# Supplementary material for: The association of dietary quality with colorectal cancer among normal weight, overweight and obese men and women: a prospective longitudinal study in the USA
Source: PubMed Central journal article supplement — BMJ Open. 2017 Jul 5;7(6):e015619. doi: 10.1136/bmjopen-2016-015619 (PMC5734399; doi:10.1136/bmjopen-2016-015619), 2017-07-05
Supplement: bmjopen-2016-015619.draft_revisions.pdf [file bmjopen-2016-015619.draft_revisions.pdf]

# BMJ Open

## Higher Dietary Quality Protects against Colorectal Cancer among Normal Weight and Overweight Men and Women but not among Obese Adults

|                                 |                                                                                                                                                                                                                                                                                                                                                                                                                                                                                                                                                                                                                                                                                    |
|---------------------------------|------------------------------------------------------------------------------------------------------------------------------------------------------------------------------------------------------------------------------------------------------------------------------------------------------------------------------------------------------------------------------------------------------------------------------------------------------------------------------------------------------------------------------------------------------------------------------------------------------------------------------------------------------------------------------------|
| Journal:                        | <i>BMJ Open</i>                                                                                                                                                                                                                                                                                                                                                                                                                                                                                                                                                                                                                                                                    |
| Manuscript ID                   | bmjopen-2016-015619                                                                                                                                                                                                                                                                                                                                                                                                                                                                                                                                                                                                                                                                |
| Article Type:                   | Research                                                                                                                                                                                                                                                                                                                                                                                                                                                                                                                                                                                                                                                                           |
| Date Submitted by the Author:   | 20-Dec-2016                                                                                                                                                                                                                                                                                                                                                                                                                                                                                                                                                                                                                                                                        |
| Complete List of Authors:       | Torres Stone, Rosalie; Clark University, Sociology; University of Massachusetts Medical School, Psychiatry<br>Waring, Molly; University of Massachusetts Medical School, Department of Quantitative Health Sciences<br>Cutrona, Sarah; University of Massachusetts Medical School, Department of Medicine<br>Kiefe, Catarina; UMass Medical School, Quantitative Health Sciences<br>Allison, Jeroan; University of Massachusetts Worcester, Department of Quantitative Health Sciences<br>Doubeni, Chyke A; University of Pennsylvania Perelman School of Medicine, Department of Family Medicine and Community Health, and the Center for Clinical Epidemiology and Biostatistics |
| <b>Primary Subject Heading</b>: | Oncology                                                                                                                                                                                                                                                                                                                                                                                                                                                                                                                                                                                                                                                                           |
| Secondary Subject Heading:      | Gastroenterology and hepatology, Epidemiology, Oncology, Public health                                                                                                                                                                                                                                                                                                                                                                                                                                                                                                                                                                                                             |
| Keywords:                       | EPIDEMIOLOGY, Gastroenterology < INTERNAL MEDICINE, NUTRITION & DIETETICS                                                                                                                                                                                                                                                                                                                                                                                                                                                                                                                                                                                                          |
|                                 |                                                                                                                                                                                                                                                                                                                                                                                                                                                                                                                                                                                                                                                                                    |

SCHOLARONE™  
Manuscripts

1  
2  
3  
4  
5  
6  
7  
8  
9 **Title: Higher Dietary Quality Protects against Colorectal Cancer among Normal Weight**  
10 **and Overweight Men and Women but not among Obese Adults**  
11  
12

13  
14  
15 Rosalie A. Torres Stone,<sup>1,2</sup> Molly E. Waring,<sup>3</sup> Sarah L. Cutrona,<sup>4</sup>  
16 Catarina I. Kiefe,<sup>3</sup> Jeroan Allison,<sup>3</sup> Chyke A. Doubeni<sup>5</sup>  
17  
18

19 <sup>1</sup>Clark University, Sociology Department, Worcester, Ma 01655 USA; <sup>2</sup>Systems and  
20 Psychosocial Advances Research Center (SPARC), Department of Psychiatry, University of  
21 Massachusetts Medical School, 222 Maple Avenue, Shrewsbury, MA 01545 USA, <sup>3</sup>Department  
22 of Quantitative Health Sciences, University of Massachusetts Medical School, Worcester, MA  
23 01605 USA; <sup>4</sup>Department of Medicine, University of Massachusetts Medical School, Worcester,  
24 MA 01605 USA <sup>5</sup>Department of Family Medicine and Community Health, and the Center for  
25 Clinical Epidemiology and Biostatistics, Perelman School of Medicine, University of  
26 Pennsylvania, Philadelphia, PA USA 19104  
27  
28  
29  
30

31  
32 **Author Note**  
33

34 Correspondence concerning this article should be addressed to Rosalie A. Torres Stone, 950  
35 Main Street, Clark University, Sociology Department, Worcester MA 01655, USA. E-mail:  
36 [rtorresstone@clarku.edu](mailto:rtorresstone@clarku.edu); Phone: 508-793-7376; Fax: 508-793-8854  
37  
38

39 **Key Words:** colorectal cancer, diet, food, and nutrition, body mass index  
40  
41

42  
43 **Manuscript Word Count: 2,999**  
44  
45  
46  
47  
48  
49  
50  
51  
52  
53  
54  
55  
56  
57  
58  
59  
60

**ABSTRACT**

**Objective:** Lower body mass index (BMI) and higher dietary quality lowers colorectal cancer (CRC) risk, but the association between diet and (CRC) risk according to BMI for men and women is not well-known.

**Methods:** We used NIH-AARP Diet and Health Study data on 398,458 persons who were 50-71 years old in 1995-1996 and followed through 2006. The exposures were the Mediterranean Diet, Healthy Eating Index-2010, and Dietary Approaches to Stop Hypertension scores; and BMI. The outcome was CRC diagnosis using cancer registry data. Cox Regression models adjusted for disease risk factors.

**Results:** Among normal-weight or overweight men, CRC risk was 25-30% lower with high as compared with low adherence to each dietary measure. The association was of borderline significance and inconsistent across the three dietary measures for obese men and women in all BMI categories.

**Conclusion:** Health benefits of consuming a higher dietary quality may include reduction of CRC risk. More research is needed for other groups defined by sex and weight.

**Public Health Implications:** The findings accentuate the need to establish a healthy food environment to reduce obesity as a cancer prevention strategy.

**Word Count: 184**

**Key Words:** colorectal cancer, diet, food, and nutrition, body mass index

## Article Summary

### Strengths and Limitations

- To our knowledge, this is the first study to examine the potential benefits of healthy eating patterns in reducing colorectal cancer risk among men and women across normal weight, overweight and obese adults.
- In this longitudinal national study of almost 400,000 adults, we found that among normal weight and overweight men, colorectal cancer risk was 25-30% lower with high adherence to each dietary measure.
- Health benefits of consuming a high-quality diet may include reduction of colorectal cancer risk.
- The findings accentuate the need to establish a health food environment to reduce obesity as a cancer prevention strategy.
- There are limitations to our study. Dietary intake was self-reported and assessed using a single baseline Food Frequency Questionnaire, thus, there is potential for non-differential measurement error. Over 90% of the sample was non-Hispanic white. Research is needed to examine whether associations are similar in other racial/ethnic groups.

### Contributors

All authors read and approved the final version of the manuscript. Rosalie A. Torres Stone drafted the original manuscript and interpreted the findings, Chyke A. Doubeni conceived of the study and participated in the analyses and interpretation of the data. Jeroan Allison and Molly E. Waring conducted the analyses and interpreted the data. Sarah L. Cutrona and Catarina I. Kiefe contributed to the interpretation of the findings and critically revised the manuscript.

### Extra data is available:

Extra data is available by submitting a proposal for each project/manuscript for review by the NIH AARP Steering Committee prior to accessing NIH AARP data and to developing an associated manuscript. A proposal must be submitted through the public website, NIH-AARP Diet & Health Study Tracking and Review System (STaRS, <https://www.nihaarpstars.com>).

### Data sharing:

No additional data is available.

### Ethical approval:

Not required. The data is de-identified.

1  
2  
3 **Word Count: 2,999**  
4

5  
6 **INTRODUCTION**  
7

8 Colorectal cancer (CRC) is the second leading cause of cancer-related deaths in the  
9 United States, claiming over 49,700 lives in 2016.(1) Modifiable risk factors such as excess  
10 body weight and unhealthy behaviors (sedentary lifestyles, unhealthy dietary patterns, and  
11 smoking) increase the risk of CRC.(2-15) Most colorectal cancers are preventable through  
12 screening, detection and removal of precancerous lesions, or healthy behaviors.(16, 17) More  
13 specifically, it has been estimated that up to 70% of colorectal cancers could be avoided by risk  
14 factor modification.(18)  
15  
16  
17  
18  
19  
20  
21  
22  
23

24 Obesity is a particularly concerning risk factor, as 37% of U.S. adults are obese.(19) A  
25 recent meta-analysis found a 30% higher risk of colon cancer in men and a 12% higher risk in  
26 women for every 5-kg/m<sup>2</sup> higher body mass index (BMI).(9) Another meta-analysis found that  
27 obese adults were at roughly 20% greater risk of developing CRC compared with those of  
28 normal weight, and risk of CRC increased 7% for every 2-kg/m<sup>2</sup> higher BMI.(10)  
29  
30  
31  
32  
33  
34  
35

36 Despite steady improvements in healthy eating patterns among US adults the overall  
37 dietary quality remains poor particularly in low income populations.(20, 21) Like obesity, diet is  
38 estimated to be one of the most important modifiable risk factors for CRC.(13-15) A dietary  
39 pattern that is rich in whole grains, vegetables, fruit, fish, legumes, and nuts and low in red and  
40 processed meat and alcohol has been linked to a substantial reduction in the risk of CRC.(2-7,  
41 13, 14) A recent narrative review of publications using the Nurses' Health Study (1976-2016)  
42 identified red and processed meat, alcohol, smoking and obesity as factors that increase the risk  
43 of CRC.(15) An ecological study suggested that 76% of the inter-country variation in colorectal  
44 cancer incidence was explained by meat, fish, and olive oil intake, with olive oil intake being  
45  
46  
47  
48  
49  
50  
51  
52  
53  
54  
55  
56  
57  
58  
59  
60

1  
2  
3 associated with reduced risk.(2) Therefore, the World Health Organization recommends  
4  
5 improving dietary quality by increasing consumption of fruit and vegetables, as well as legumes,  
6  
7 whole grains, and nuts.(22) These recommendations are similar to those defined in the Dietary  
8  
9 Guidelines, studied in the Dietary Approaches to Stop Hypertension trial,(23) and are also  
10  
11 similar to recommendations found in the alternate Mediterranean Diet examined in the Seven  
12  
13 Countries Study.(24) However, it is not known whether the potential benefits of dietary  
14  
15 interventions are similar across varying weight categories and among men and women.  
16  
17  
18  
19

20 Despite the potential benefits of a healthy BMI, many overweight and obese adults are  
21  
22 not motivated or able to lose weight,(25) raising important questions. In the absence of weight  
23  
24 loss, can a healthy diet still reduce CRC risk among overweight or obese adults? If so, does the  
25  
26 protective effect of a healthy dietary pattern vary by weight category? To our knowledge, these  
27  
28 questions have not been answered previously. Our study examined the association between  
29  
30 dietary quality and the risk of CRC and studied the variation in this association between normal  
31  
32 weight, overweight, and obese adults. Because dietary patterns and their effects have been  
33  
34 observed to be different for men and women analyses were stratified by gender.(13)  
35  
36  
37  
38

## 39 **METHODS**

40 We used data from the National Institutes of Health-AARP (formerly the American  
41  
42 Association of Retired Persons) Diet and Health Study. The NIH-AARP cohort was established  
43  
44 in 1995-1996. AARP members who were contacted, returned questionnaires eliciting  
45  
46 information on demographic and anthropometric characteristics, dietary intake, and health-  
47  
48 related behaviors. Initial response rate was 18%. Eligible participants were 50 to 71 years old  
49  
50 and resided in six U.S. states (California, Florida, Louisiana, New Jersey, North Carolina, and  
51  
52 Pennsylvania) and two metropolitan areas (Atlanta, Georgia, and Detroit, Michigan).  
53  
54  
55  
56  
57  
58  
59  
60

## Outcome

The outcome for this analysis was diagnosis with incident adenocarcinoma of the colon/rectum ascertained from tumor registries through December 31, 2006. Cancer diagnosis in participants was determined through probabilistic linkage with 8 state cancer registries. A validation study found that this approach captured approximately 90% of all cancers.(26) Cancer type and histologic characteristics were obtained from tumor registry data using International Classification of Diseases – Oncology codes [8000, 8010, 8020, 8140-43, 8210-8211, 8221, 8255, 8261-3, 8480-1, 8490, 8510, and 8574].

## Determinants

The main determinants for this analysis were three indices of dietary quality. At baseline in 1995-1996, dietary intake during the past 12 months were assessed using a 124-item Food Frequency Questionnaire. The NIH-AARP Food Frequency Questionnaire was previously validated against 24-hour dietary recall in this cohort.(26) The Diet History Questionnaire has been calibrated,(26, 27) and further validation was performed by using two 24-h recalls within a subset of the NIH-AARP Diet and Health Study.(28) By using the guidance-based food group equivalents and other nutrient variables, we calculated component and index scores for the Healthy Eating Index-2010 (HEI-2010).(29) alternate Mediterranean Diet Score,(30) and the Dietary Approaches to Stop Hypertension (DASH)(30), adjusting(30) on the basis of published descriptions of the indices, making appropriate adjustments for energy intake as described by Reedy et. al.(31)

The alternate Mediterranean Diet Score ranges from 0 to 9 with higher scores corresponding to diets more consistent with a Mediterranean diet (healthier). The score was

1  
2  
3 energy adjusted by multiplying by 2,500 calories for men and 2,000 calories for women and  
4  
5 dividing by reported energy intake.(13, 30, 32) One point each is given for: intake at or greater  
6  
7 than the sex-specific median for whole grains, vegetables, fruit, fish, legumes, and nuts; intake  
8  
9 less than the sex-specific median for red and processed meat; and the monounsaturated: saturated  
10  
11 fat ratio. Alcohol intake was scored by predetermined cut points for moderate intake (men: 10-25  
12  
13 grams per day, women: 5-15 grams per day);(13) participants with moderate alcohol intake  
14  
15 received 1 point; other intakes (none, occasional, excessive) received 0 points.  
16  
17  
18  
19

20 The Healthy Eating Index 2010 was developed for measuring dietary quality based on  
21  
22 federal guidelines.(29) It awards points based on the adequacy of intake in nine categories (total  
23  
24 fruit, whole fruit, total vegetables, greens and beans, whole grains, dairy, total protein foods, and  
25  
26 seafood and plant proteins, and fatty acids) and moderation of intake in three categories (refined  
27  
28 grains, sodium, and empty calories). The Healthy Eating Index 2010 ranges from 0 to 100 with  
29  
30 higher scores indicating better dietary quality.  
31  
32  
33

34 DASH scores capture the diet tested in 2 DASH randomized controlled feeding trials,(23,  
35  
36 33) which examined the role of dietary patterns on blood pressure. Several versions of the DASH  
37  
38 score exist, and we used the one most commonly found in the literature with U.S.  
39  
40 populations.(30) To derive the score for the DASH Diet, intake was classified into quintiles for  
41  
42 the following categories: fruits, vegetables, nuts and legumes, whole grains, low-fat dairy  
43  
44 (higher intake indicated by higher quintile) and sodium, red and processed meats, and sweetened  
45  
46 beverages (higher intake indicated by lower quintiles).(31) Based on these eight categories, the  
47  
48 DASH Score ranged from 8 to 40, with higher scores indicating better dietary quality.  
49  
50  
51  
52  
53  
54  
55  
56  
57  
58  
59  
60



1  
2  
3 BMI was calculated from height and weight self-reported at baseline and categorized  
4 based on WHO criteria (normal: 18.5 to < 25 kg/m<sup>2</sup>, overweight: 25 to < 30 kg/m<sup>2</sup>, and obese: ≥  
5  
6  
7  
8 30 kg/m<sup>2</sup>).

### 9 10 **Covariates**

11  
12 Characteristics self-reported at baseline included gender, age (50-54 years, 55-59 years,  
13 60-64 years, 65-69 years, ≥ 70 years), educational level (high school or less, some college, or  
14 college degree), and race/ethnicity (Non-Hispanic White, Non-Hispanic Black, Hispanic,  
15 Asian/Pacific Islander, American Indian/Alaskan Native). Self-reported health status was based  
16 on a single item by which respondents classified their current state of general health as excellent,  
17 very good, good, fair, or poor. Other risk factors for CRC included: smoking status (never  
18 smoked, former smoker, current smoker) and physical activity. Participants were asked how  
19 often (in the previous 12 months) they engaged in physical activity that lasted ≥ 20 minutes and  
20 caused increases in breathing or heart rate, or made the participant sweat (never, rarely, 1-3 times  
21 per month, 1-2 times per week, 3-4 times per week, ≥ 5 more times per week).

### 22 23 24 25 26 27 28 29 30 31 32 33 34 35 36 **Construction of the analytic sample**

37  
38 Of the 566,398 adults enrolled in the Diet-AARP Health Study, we excluded those who:  
39 (1) completed questionnaires by proxy (n=15,760); (2) reported a history of end-stage renal  
40 disease (1,299); (3) reported a history of cancer (8,902) or had registry confirmed prevalent  
41 cancer (50,591); (4) reported a history of colonic or rectal polyps (57,179); (5) reported any first-  
42 degree relatives with colon cancer (50,552); (6) were underweight (BMI < 18.5 kg/m<sup>2</sup>) (5,912);  
43 (7) were missing height or weight (13,944), and participants who reported implausibly high or  
44 low energy intake based on Box-Cox transformation procedures designed for this dataset  
45 (n=3,534), (28) resulting in an analytic sample of 398,458 adults.

### 46 47 48 49 50 51 52 53 54 55 56 57 **Statistical Analysis**

1  
2  
3 Univariate characteristics were examined for all variables. Chi-square tests were used to  
4 compare characteristics of participants who did and did not develop CRC over the follow-up  
5 period for categorical variables, and the ANOVA was used for continuous variables. We  
6 examined the multivariable association of participant characteristics with dietary adherence using  
7 a linear regression model treating the dietary measures as continuous. Based on known risk  
8 factors for CRC, covariates in these models included age, gender, race/ethnicity, education,  
9 smoking status, physical activity, and weight category.  
10  
11

12  
13  
14  
15  
16  
17  
18  
19  
20 Next, we examined the association of dietary patterns with incident CRC stratified by  
21 BMI category (normal, overweight, and obese) separately for men and women. Two-level  
22 dietary pattern comparisons were based on the highest and lowest tertiles of adherence.  
23  
24  
25  
26  
27 Bivariate associations were based on the log-rank test.  
28

29  
30  
31  
32  
33  
34  
35  
36  
37  
38  
39  
40  
41  
42  
43  
44  
45  
46  
47  
48  
49  
50  
51  
52  
53  
54  
55  
56  
57  
58  
59  
60  
Cox regression with person-years as the underlying time metric was used to calculate the hazard of developing CRC, within BMI category and gender groups. Separate models were constructed for each dietary index and all models were adjusted for age, race/ethnicity, smoking, and physical activity. A second set of Cox regression models was also created across weight categories that included interaction terms for weight category and dietary adherence. From this second set of models, we predicted the probability of incident CRC at 10 years for each level of dietary quality and weight by raising the baseline hazard at 10 years to the power of the exponentiated linear predictor. Confidence intervals for the predicted probabilities were constructed with the delta method for approximation of complex variance estimates using Taylor linearization.<sup>(34)</sup> We found no evidence to suggest that proportional hazards assumptions were violated.<sup>(35)</sup> All analyses were performed with Stata 14.1 (StataCorp LP, College Station, TX).

## RESULTS

1  
2  
3 At baseline, most participants were  $\geq 60$  years old (61%) and non-Hispanic white (91%);  
4  
5 59% were men (Table 1).  
6  
7  
8  
9  
10  
11  
12  
13  
14  
15  
16  
17  
18  
19  
20  
21  
22  
23  
24  
25  
26  
27  
28  
29  
30  
31  
32  
33  
34  
35  
36  
37  
38  
39  
40  
41  
42  
43  
44  
45  
46  
47  
48  
49  
50  
51  
52  
53  
54  
55  
56  
57  
58  
59  
60

For peer review only

1  
2  
3  
4  
5  
6  
7  
8  
9  
10  
11  
12  
13  
14  
15  
16  
17  
18  
19  
20  
21  
22  
23  
24  
25  
26  
27  
28  
29  
30  
31  
32  
33  
34  
35  
36  
37  
38  
39  
40  
41  
42  
43  
44  
45  
46  
47  
48  
49  
50  
51  
52  
53  
54  
55  
56  
57  
58  
59  
60

|                                                                                                                                                            | Overall | Did Not Develop Colorectal Cancer | Developed Colorectal Cancer | P-value |
|------------------------------------------------------------------------------------------------------------------------------------------------------------|---------|-----------------------------------|-----------------------------|---------|
| N                                                                                                                                                          | 398,458 | 391,943                           | 6,515                       |         |
| <b>Age (years), %</b>                                                                                                                                      |         |                                   |                             |         |
| <55                                                                                                                                                        | 17.28   | 17.42                             | 7.97                        | <0.001  |
| 55-59                                                                                                                                                      | 22.04   | 22.15                             | 15.25                       |         |
| 60-64                                                                                                                                                      | 26.29   | 26.28                             | 27.50                       |         |
| 65-69                                                                                                                                                      | 30.33   | 30.12                             | 43.29                       |         |
| > 69                                                                                                                                                       | 4.06    | 4.03                              | 5.99                        |         |
| <b>Gender</b>                                                                                                                                              |         |                                   |                             |         |
| Female, %                                                                                                                                                  | 40.60   | 40.76                             | 31.19                       | <0.001  |
| <b>Race/Ethnicity, %</b>                                                                                                                                   |         |                                   |                             |         |
| Non-Hispanic White                                                                                                                                         | 92.31   | 92.30                             | 92.84                       | 0.031   |
| Non-Hispanic-Black                                                                                                                                         | 3.99    | 3.98                              | 4.16                        |         |
| Hispanic                                                                                                                                                   | 1.99    | 2.00                              | 1.65                        |         |
| Asian/Pacific Islander                                                                                                                                     | 1.42    | 1.43                              | 1.06                        |         |
| American Indian/ Alaska Native                                                                                                                             | 0.29    | 0.29                              | 0.30                        |         |
| <b>Education, %</b>                                                                                                                                        |         |                                   |                             |         |
| High School                                                                                                                                                | 26.38   | 26.31                             | 30.40                       | <0.001  |
| Some College                                                                                                                                               | 34.24   | 34.23                             | 34.86                       |         |
| College Degree                                                                                                                                             | 39.38   | 39.45                             | 34.74                       |         |
| <b>Smoking Status, %</b>                                                                                                                                   |         |                                   |                             |         |
| Never                                                                                                                                                      | 37.00   | 37.11                             | 30.71                       | <0.001  |
| Former                                                                                                                                                     | 50.60   | 50.50                             | 56.68                       |         |
| Current                                                                                                                                                    | 12.40   | 12.39                             | 12.61                       |         |
| <b>Physical Activity (≥20 minutes in past 12 months), %</b>                                                                                                |         |                                   |                             |         |
| Never                                                                                                                                                      | 4.41    | 4.40                              | 5.32                        | <0.001  |
| Rarely                                                                                                                                                     | 13.63   | 13.61                             | 15.03                       |         |
| 1-2 times/month                                                                                                                                            | 13.74   | 13.74                             | 13.93                       |         |
| 1-2 times/week                                                                                                                                             | 21.78   | 21.78                             | 21.51                       |         |
| 2-4 times/week                                                                                                                                             | 26.99   | 27.01                             | 25.99                       |         |
| 3-5 times/week                                                                                                                                             | 19.45   | 19.47                             | 18.23                       |         |
| <b>Baseline weight status, %</b>                                                                                                                           |         |                                   |                             |         |
| Normal                                                                                                                                                     | 35.09   | 35.18                             | 29.98                       | <0.001  |
| Overweight                                                                                                                                                 | 42.81   | 42.77                             | 44.88                       |         |
| Obese                                                                                                                                                      | 22.10   | 22.05                             | 25.14                       |         |
| Weight status was based on BMI (normal weight: 18.5 to < 25 kg/m <sup>2</sup> ; overweight: 25 to < 30 kg/m <sup>2</sup> ; obese: ≥30 kg/m <sup>2</sup> ). |         |                                   |                             |         |

About 35% of the sample were normal weight, 43% were overweight, and 22% were obese.

Mean (sd; range) scores for dietary quality were 4.2 (1.7; 0 - 9) for the alternate Mediterranean

1  
2  
3 Diet, 65.9 (10.7; 18.2 - 98.4) for the Healthy Eating Index 2010, and 23.8 (4.1; 8 – 37) for the  
4  
5 DASH Diet.  
6  
7

8           During 10 years of follow-up, 6,515 participants (1.64%) were diagnosed with colorectal  
9  
10 cancer. The percent of those diagnosed with colorectal cancer was higher moving across BMI  
11  
12 categories from normal to obese (1.4%, 1.8%, 1.9%; p-value from log-rank trend test < 0.001).  
13  
14 Older age, being male, having lower levels of physical activity, smoking, having less education,  
15  
16 being overweight or obese, and poorer diet quality were associated with an increased risk of  
17  
18 colorectal cancer (p < 0.001) (Table 1). Compared to non-Hispanic whites, the incidence of  
19  
20 colorectal cancer was higher for non-Hispanic blacks and lower for Asians/Pacific Islanders (p =  
21  
22 0.031).  
23  
24  
25  
26

27           Results from the linear regression models predicting dietary adherence and the measures  
28  
29 of dietary quality are presented in Table 2.  
30  
31  
32  
33  
34  
35  
36  
37  
38  
39  
40  
41  
42  
43  
44  
45  
46  
47  
48  
49  
50  
51  
52  
53  
54  
55  
56  
57  
58  
59  
60

1  
2  
3  
4  
5  
6  
7  
8  
9  
10  
11  
12  
13  
14  
15  
16  
17  
18  
19  
20  
21  
22  
23  
24  
25  
26  
27  
28  
29  
30  
31  
32  
33  
34  
35  
36  
37  
38  
39  
40  
41  
42  
43  
44  
45  
46  
47  
48  
49  
50  
51  
52  
53  
54  
55  
56  
57  
58  
59  
60

|                                                                           | Mediterranean Diet |               | Healthy Eating Index |               | DASH Diet |               |
|---------------------------------------------------------------------------|--------------------|---------------|----------------------|---------------|-----------|---------------|
|                                                                           | $\beta$            | 95% CI        | $\beta$              | 95% CI        | $\beta$   | 95% CI        |
| <b>Age (years)</b>                                                        |                    |               |                      |               |           |               |
| <55                                                                       | ---                | ---           |                      |               |           |               |
| 55-59                                                                     | 0.16               | 0.14 – 0.18   | 1.17                 | 1.05 – 1.28   | 0.32      | 0.28 – 0.37   |
| 60-64                                                                     | 0.26               | 0.25 – 0.28   | 2.03                 | 1.92 – 2.14   | 0.63      | 0.59 – 0.68   |
| 65-69                                                                     | 0.31               | 0.30 – 0.33   | 2.62                 | 2.51 – 2.73   | 0.89      | 0.85 – 0.93   |
| > 69                                                                      | 0.37               | 0.34 – 0.41   | 3.10                 | 2.90 – 3.29   | 1.18      | 1.10 – 1.25   |
| <b>Gender</b>                                                             |                    |               |                      |               |           |               |
| Male                                                                      | ---                | ---           |                      |               |           |               |
| Female                                                                    | 0.10               | 0.08 – 0.10   | 3.80                 | 3.72 – 3.87   | 0.39      | 0.36 – 0.41   |
| <b>Race/Ethnicity</b>                                                     |                    |               |                      |               |           |               |
| Non-Hispanic White                                                        | ---                | ---           |                      |               |           |               |
| Non-Hispanic-Black                                                        | 0.31               | 0.28 – 0.34   | 0.78                 | 0.59 – 0.97   | -0.25     | -0.32 – -0.18 |
| Hispanic                                                                  | 0.05               | 0.01 – 0.10   | 0.77                 | 0.51 – 1.03   | 0.09      | -0.01 – 0.19  |
| Asian/Pacific Islander                                                    | 0.01               | -0.04 – 0.06  | -0.36                | -0.67 – -0.06 | -0.64     | -0.76 – -0.52 |
| American Indian/ Alaska Native                                            | 0.07               | -0.04 – 0.18  | 0.10                 | -0.57 – 0.77  | -0.08     | -0.34 – 0.18  |
| <b>Education</b>                                                          |                    |               |                      |               |           |               |
| High School                                                               | ---                | ---           | ---                  | ---           | ---       | ---           |
| Some College                                                              | 0.28               | 0.26 – 0.29   | 1.97                 | 1.87 – 2.06   | 0.59      | 0.55 – 0.63   |
| College Degree                                                            | 0.59               | 0.58 – 0.61   | 3.80                 | 3.70 – 3.89   | 1.29      | 1.26 – 1.33   |
| <b>Smoking Status</b>                                                     |                    |               |                      |               |           |               |
| Never                                                                     | ---                | ---           |                      |               |           |               |
| Former                                                                    | 0.02               | 0.00 – 0.03   | -0.28                | -0.36 – -0.20 | -0.18     | 0.55 – 0.63   |
| Current                                                                   | -0.71              | -0.73 – 0.69  | -5.89                | -6.01 – -5.77 | -1.90     | 1.26 – 1.33   |
| <b>Physical Activity (<math>\geq 20</math> minutes in past 12 months)</b> |                    |               |                      |               |           |               |
| Never                                                                     | ---                | ---           |                      |               |           |               |
| Rarely                                                                    | 0.14               | 0.11 – 0.17   | 1.26                 | 1.07 – 1.46   | 0.09      | 0.01 – 0.16   |
| 1-2 times/month                                                           | 0.30               | 0.27 – 0.33   | 2.71                 | 2.52 – 2.92   | 0.37      | 0.29 – 0.45   |
| 1-2 times/week                                                            | 0.52               | 0.48 – 0.55   | 4.17                 | 3.98 – 4.36   | 0.91      | 0.84 – 0.99   |
| 2-4 times/week                                                            | 0.79               | 0.76 – 0.82   | 6.05                 | 5.86 – 6.24   | 1.72      | 1.64 – 1.79   |
| 3-5 times/week                                                            | 0.88               | 0.84 – 0.91   | 6.52                 | 6.33 – 6.71   | 2.30      | 2.22 – 2.37   |
| <b>Weight Category<sup>†</sup></b>                                        |                    |               |                      |               |           |               |
| Normal                                                                    | ---                | ---           |                      |               |           |               |
| Overweight                                                                | -0.16              | -0.17 – -0.15 | -0.39                | -0.47 – -0.31 | -0.33     | -0.36 – -0.30 |
| Obese                                                                     | -0.31              | -0.32 – -0.29 | -0.88                | -0.98 – -0.78 | -0.38     | -0.42 – -0.35 |

\*From separate linear regression models for each dietary measure.  
<sup>†</sup>Weight categories were based on BMI (normal: 18.5 to < 25 kg/m<sup>2</sup>; overweight: 25 to < 30 kg/m<sup>2</sup>; obese:  $\geq 30$  kg/m<sup>2</sup>).

We found “dose-response” associations for older age, higher education, and more frequent physical activity with higher quality diet. Women had better adherence for all three dietary patterns. For the alternate Mediterranean Diet and Health Eating Index-2010, Non-Hispanic Black and Hispanic individuals exhibited small yet statistically significantly higher scores

compared to those white adults. Separate models for men and women revealed no important differences (data not shown).

Based on the multivariable models, which included adjustment for age, gender, race/ethnicity, smoking, and physical activity, the hazards of incident CRC were 25-30% lower for men with high dietary adherence who were of normal weight or who were overweight (Table 3a). Smaller differences that were not statistically significant were observed for men who were obese. In general, similar differences in the risk of incident CRC were also observed for women across all dietary quality measures (Table 3b), but these associations were not statistically significant. Women of normal weight with high adherence to the DASH diet and women who were overweight with high adherence to the Healthy Eating Index-2010 had statistically lower incidence of CRC than those with low diet quality on these measures.

**Table 3a. Hazard Ratios and 95% Confidence Intervals for Incidence of Colorectal Cancer by Baseline Dietary Pattern and Weight Category, NIH-AARP Diet and Health Study, 1996-2006, n=238,754 for men**

| Dietary Score                                  | Normal Weight |             | Overweight   |             | Obese        |             |
|------------------------------------------------|---------------|-------------|--------------|-------------|--------------|-------------|
|                                                | Hazard Ratio  | 95% CI      | Hazard Ratio | 95% CI      | Hazard Ratio | 95% CI      |
| <b>Mediterranean Diet</b>                      |               |             |              |             |              |             |
| Low Adherence                                  | ---           | ---         | ---          | ---         | ---          | ---         |
| High Adherence                                 | 0.73          | 0.60 – 0.89 | 0.73         | 0.63 – 0.84 | 0.85         | 0.69 – 1.05 |
| <b>Healthy Eating Index</b>                    |               |             |              |             |              |             |
| Low Adherence                                  | ---           | ---         | ---          | ---         | ---          | ---         |
| High Adherence                                 | 0.70          | 0.58 – 0.84 | 0.74         | 0.65 – 0.84 | 0.84         | 0.70 – 1.02 |
| <b>Dietary Approaches to Stop Hypertension</b> |               |             |              |             |              |             |
| Low Adherence                                  | ---           | ---         | ---          | ---         | ---          | ---         |
| High Adherence                                 | 0.73          | 0.61 – 0.88 | 0.75         | 0.66 – 0.85 | 0.88         | 0.73 – 1.06 |

Cox proportional hazard models adjusted for age, gender, race/ethnicity, smoking, and physical activity and include interaction terms for baseline dietary scores and weight category. Separate models were developed for each dietary pattern. Dietary categories (low, high) are based on tertiles of native score. The lowest tertile is the reference group. Weight categories were based on BMI (normal: 18.5 to < 25 kg/m<sup>2</sup>; overweight: 25 to < 30 kg/m<sup>2</sup>; obese: ≥30 kg/m<sup>2</sup>).

**Table 3b. Hazard Ratios and 95% Confidence Intervals for Incidence of Colorectal Cancer by Baseline Dietary Pattern and Weight Category, NIH-AARP Diet and Health Study, 1996-2006, n=163,238 for women**

| Dietary Score                                                                                                                                                                                                                                                                                                                                                                                                                                                                   | Normal Weight |             | Overweight   |             | Obese        |             |
|---------------------------------------------------------------------------------------------------------------------------------------------------------------------------------------------------------------------------------------------------------------------------------------------------------------------------------------------------------------------------------------------------------------------------------------------------------------------------------|---------------|-------------|--------------|-------------|--------------|-------------|
|                                                                                                                                                                                                                                                                                                                                                                                                                                                                                 | Hazard Ratio  | 95% CI      | Hazard Ratio | 95% CI      | Hazard Ratio | 95% CI      |
| <b>Mediterranean Diet</b>                                                                                                                                                                                                                                                                                                                                                                                                                                                       |               |             |              |             |              |             |
| Low Adherence                                                                                                                                                                                                                                                                                                                                                                                                                                                                   | ---           | ---         | ---          | ---         | ---          | ---         |
| High Adherence                                                                                                                                                                                                                                                                                                                                                                                                                                                                  | 0.97          | 0.77 – 1.22 | 0.99         | 0.77 – 1.27 | 0.76         | 0.56 – 1.04 |
| <b>Healthy Eating Index</b>                                                                                                                                                                                                                                                                                                                                                                                                                                                     |               |             |              |             |              |             |
| Low Adherence                                                                                                                                                                                                                                                                                                                                                                                                                                                                   | ---           | ---         | ---          | ---         | ---          | ---         |
| High Adherence                                                                                                                                                                                                                                                                                                                                                                                                                                                                  | 0.84          | 0.68 – 1.04 | 0.70         | 0.55 – 0.89 | 0.80         | 0.62 – 1.03 |
| <b>Dietary Approaches to Stop Hypertension</b>                                                                                                                                                                                                                                                                                                                                                                                                                                  |               |             |              |             |              |             |
| Low Adherence                                                                                                                                                                                                                                                                                                                                                                                                                                                                   | ---           | ---         | ---          | ---         | ---          | ---         |
| High Adherence                                                                                                                                                                                                                                                                                                                                                                                                                                                                  | 0.80          | 0.64 – 0.98 | 0.81         | 0.64 – 1.03 | 0.82         | 0.63 – 1.08 |
| Cox proportional hazard models adjusted for age, gender, race/ethnicity, smoking, and physical activity and include interaction terms for baseline dietary scores and weight category. Separate models were developed for each dietary pattern. Dietary adherence categories are based on lowest and highest tertiles. Weight categories were based on BMI (normal: 18.5 to < 25 kg/m <sup>2</sup> ; overweight: 25 to < 30 kg/m <sup>2</sup> ; obese: ≥30 kg/m <sup>2</sup> ). |               |             |              |             |              |             |

High dietary adherence was associated with a statistically significant decrease in the probability of incident CRC of about 0.6% for men who were of normal weight or overweight (Table 4a).

Smaller differences that were not statistically significant were found for men who were obese and for women from all weight categories (Tables 4a and 4b).



**Table 4a. Probability and 95% Confidence Interval of Colorectal Cancer at 10 Years by Baseline Dietary Pattern and Weight Category, NIH-AARP Diet and Health Study, 1996-2006, n=238,754 for men**

| Dietary Score        | Mediterranean Diet |                | Healthy Eating Index |                | Dietary Approaches to Stop Hypertension |                |
|----------------------|--------------------|----------------|----------------------|----------------|-----------------------------------------|----------------|
|                      | Probability        | 95% CI         | Probability          | 95% CI         | Probability                             | 95% CI         |
| <b>Normal Weight</b> |                    |                |                      |                |                                         |                |
| Low                  | 0.018              | 0.008 – 0.028  | 0.019                | 0.009 – 0.029  | 0.018                                   | 0.008 – 0.028  |
| High                 | 0.012              | 0.005 – 0.019  | 0.012                | 0.005 – 0.020  | 0.012                                   | 0.005 – 0.020  |
| Difference           | 0.006              | 0.002 – 0.010  | 0.006                | 0.002 – 0.010  | 0.006                                   | 0.002 – 0.009  |
| <b>Overweight</b>    |                    |                |                      |                |                                         |                |
| Low                  | 0.020              | 0.009 – 0.031  | 0.021                | 0.001 – 0.032  | 0.020                                   | 0.008 – 0.032  |
| High                 | 0.014              | 0.006 – 0.022  | 0.015                | 0.007 – 0.024  | 0.015                                   | 0.006 – 0.024  |
| Difference           | 0.006              | 0.002 – 0.010  | 0.005                | 0.002 – 0.009  | 0.005                                   | 0.001 – 0.008  |
| <b>Obese</b>         |                    |                |                      |                |                                         |                |
| Low                  | 0.021              | 0.009 – 0.032  | 0.021                | 0.009 – 0.033  | 0.021                                   | 0.009 – 0.033  |
| High                 | 0.018              | 0.008 – 0.028  | 0.018                | 0.008 – 0.028  | 0.019                                   | 0.007 – 0.030  |
| Difference           | 0.003              | -0.001 – 0.007 | 0.003                | -0.001 – 0.007 | 0.002                                   | -0.001 – 0.006 |

Probabilities are based on a Cox model that adjusts for age, gender, race/ethnicity, smoking, and physical activity and include interaction terms for baseline dietary scores and weight category. Separate models were developed for each dietary pattern. Dietary adherence categories are based on lowest and highest tertiles. Weight categories were based on BMI (normal: 18.5 to < 25 kg/m<sup>2</sup>; overweight: 25 to < 30 kg/m<sup>2</sup>; obese: ≥30 kg/m<sup>2</sup>). Differences at last decimal place may not be exact because of rounding.

**Table 4b. Probability and 95% Confidence Interval of Colorectal Cancer at 10 Years by Baseline Dietary Pattern and Weight Category, NIH-AARP Diet and Health Study, 1996-2006, n=163,238 for women**

| Dietary Score        | Mediterranean Diet |                | Healthy Eating Index |                | Dietary Approaches to Stop Hypertension |                |
|----------------------|--------------------|----------------|----------------------|----------------|-----------------------------------------|----------------|
|                      | Probability        | 95% CI         | Probability          | 95% CI         | Probability                             | 95% CI         |
| <b>Normal Weight</b> |                    |                |                      |                |                                         |                |
| Low                  | 0.011              | -0.000 – 0.022 | 0.012                | -0.000 – 0.024 | 0.012                                   | -0.000 – 0.024 |
| High                 | 0.010              | -0.001 – 0.021 | 0.010                | -0.000 – 0.021 | 0.010                                   | -0.000 – 0.020 |
| Difference           | 0.000              | -0.001 – 0.003 | 0.002                | -0.001 – 0.004 | 0.002                                   | -0.001 – 0.005 |
| <b>Overweight</b>    |                    |                |                      |                |                                         |                |
| Low                  | 0.012              | -0.001 – 0.025 | 0.013                | -0.001 – 0.027 | 0.013                                   | -0.001 – 0.028 |
| High                 | 0.012              | -0.001 – 0.024 | 0.009                | -0.000 – 0.019 | 0.011                                   | -0.001 – 0.023 |
| Difference           | 0.000              | -0.003 – 0.003 | 0.004                | -0.001 – 0.009 | 0.002                                   | -0.001 – 0.006 |
| <b>Obese</b>         |                    |                |                      |                |                                         |                |
| Low                  | 0.014              | -0.001 – 0.029 | 0.014                | -0.001 – 0.029 | 0.014                                   | -0.001 – 0.028 |
| High                 | 0.012              | -0.001 – 0.024 | 0.012                | -0.001 – 0.025 | 0.012                                   | -0.001 – 0.024 |
| Difference           | 0.003              | -0.001 – 0.007 | 0.002                | -0.002 – 0.006 | 0.002                                   | -0.002 – 0.006 |

Probabilities are based on a Cox model that adjusts for age, gender, race/ethnicity, smoking, and physical activity and include interaction terms for baseline dietary scores and weight category. Separate models were developed for each dietary pattern. Dietary categories (low, high) are based on tertiles of native score. Weight categories were based on BMI (normal: 18.5 to < 25 kg/m<sup>2</sup>; overweight: 25 to < 30 kg/m<sup>2</sup>; obese: ≥30 kg/m<sup>2</sup>). Differences at last decimal place may not be exact because of rounding.

## DISCUSSION

In this large national study of nearly 400,000 older adults, we found that high quality diets as measured by three diet quality indices (alternate Mediterranean Diet Score, the Healthy Eating Index 2010, and the Dietary Approaches to Stop Hypertension Score) were each associated with lower risk of CRC among normal weight and overweight men. Additionally, high quality diets as measured by the DASH were associated with lower incidence of CRC among normal weight women, and high diet quality measured by the Healthy Eating Index was associated with lower risk among overweight women. Diet quality was not associated with risk of CRC among either obese men or obese women.

Although previous studies have not examined differences according to baseline weight status, our findings are consistent with previous studies that demonstrate that higher dietary quality is associated with reduced risk of colorectal adenoma in general.(13) A review of epidemiological studies investigating the associations between dietary patterns including the DASH, the Mediterranean Diet, and the Healthy Eating Index has also shown a consistently protective effect against colorectal adenoma and cancer incidence of higher scores on all of the dietary indexes for men, but was less conclusive for women.(13, 36) Results from a large prospective examination of four established DASH indexes found that greater compliance with the DASH dietary pattern is protective against CRC for both men and women.(37) This consistency across the three dietary patterns is not surprising because each of these dietary approaches is built on a similar foundation of fresh fruits and vegetables, whole grains, and low saturated fat.

There are physiologic mechanisms through which diet may be protective against CRC and also through which this protective effect may differ for men and for women. For example, studies focused on individual nutrients suggest that olive oil may exert a protective effect by

1  
2  
3 influencing secondary bile acid patterns in the colon. This may in turn affect polyamine  
4 metabolism in colonic enterocytes, reducing progression from normal mucosa to adenoma and  
5 carcinoma.(3) Fiber intake may reduce the contact between carcinogens and the lining of the  
6 colon/rectum and increase stool bulk which dilutes fecal carcinogens and decreases transit  
7 time.(2, 7) Red and processed meat may exert a carcinogenic effect due to heme iron, N-nitro  
8 compounds and heterocyclic amines generated during cooking at high temperatures as well as a  
9 pro-neoplastic effect due to increased adiposity and insulin. Other studies suggest that dietary  
10 patterns that include a high consumption of high saturated fatty acid intake may increase CRC  
11 risk via their effects on serum insulin concentrations and on the bioavailability of insulin-like  
12 growth factor-I (IGF-I).(38) Whole grain intake has been associated with decreased fasting  
13 insulin level and improved insulin sensitivity.(7, 39) The differential response of dietary intake  
14 to risk of CRC incidence by sex in our study could be explained by differences in the etiology of  
15 CRC between men and women.(13) Studies have indicated that women are more likely to  
16 develop proximal CRC compared to men.(40) Because proximal and distal CRC appear to arise  
17 from different pathways it is possible that the response to dietary intake varies by proximal and  
18 distal location type.(40)

19  
20  
21  
22  
23  
24  
25  
26  
27  
28  
29  
30  
31  
32  
33  
34  
35  
36  
37  
38  
39  
40  
41  
42  
43  
44  
45  
46  
47  
48  
49  
50  
51  
52  
53  
54  
55  
56  
57  
58  
59  
60

These results support initiatives to establish a healthy food environment to support whole grains, vegetables, fruit and plant based proteins to reduce obesity as a cancer prevention strategy.(31, 41) There is growing evidence that local food environments influence access and availability to health eating patterns.(42) A study investigating the associations of supermarket availability and healthy dietary patterns found that participants who have no supermarkets near their homes were 25-46 percent less likely to have a healthy diet.(7, 41) Fostering a food environment that makes it easier for US adults to consume a high-quality diet would provide

1  
2  
3 health benefits to the population, both in terms of potential prevention of CRC and also other  
4  
5 chronic diseases linked to dietary intake such as diabetes and cardiovascular disease.(31, 32, 42-  
6  
7  
8 44)

9  
10 Our study has some limitations. Dietary intake was self-reported and assessed using a  
11  
12 single baseline Food Frequency Questionnaire, thus, there is potential for non-differential  
13  
14 measurement error.(45) With only a single measure, we could not examine changes in dietary  
15  
16 intake over time. It is possible that the observed differences between men and women are  
17  
18 artifacts from how the data were collected. For example, it has been suggested that differential  
19  
20 bias could be introduced by the way women and men complete the Food Frequency  
21  
22 Questionnaire.(45, 46) It is also possible that women in the AARP (as a group) have more  
23  
24 variation in diet patterns and perception of dietary intake (and weight status) over time than  
25  
26 men.(26) Additionally, there is evidence that difference in dietary patterns may vary for men  
27  
28 and women who respond in a similar manner to the same survey.(13) Over 90% of the sample  
29  
30 was non-Hispanic white. The research consistently shows that incident rates of CRC and obesity  
31  
32 prevalence are higher in African Americans compared to whites.(47, 48) Research is needed to  
33  
34 examine whether associations are similar in other racial/ethnic groups.  
35  
36  
37  
38  
39

40  
41 This longitudinal national study of almost 400,000 adults found that among normal-  
42  
43 weight and overweight men, CRC risk was 25-30% lower with high adherence to each dietary  
44  
45 measure. High adherence to the DASH diet was associated with lower risk among normal  
46  
47 weight women, and high adherence to the Healthy Eating Index was associated with lower risk  
48  
49 among overweight women. Diet quality was not associated with cancer risk among obese adults.  
50  
51 Health benefits of consuming a high-quality diet may include reduction of CRC risk.  
52  
53  
54  
55  
56  
57  
58  
59  
60

1  
2  
3 **Acknowledgments:** This research was supported [in part] by the Intramural Research Program  
4 of the NIH, National Cancer Institute. Cancer incidence data from the Atlanta metropolitan area  
5 were collected by the Georgia Center for Cancer Statistics, Department of Epidemiology, Rollins  
6 School of Public Health, Emory University, Atlanta, Georgia. Cancer incidence data from  
7 California were collected by the California Cancer Registry, California Department of Public  
8 Health's Cancer Surveillance and Research Branch, Sacramento, California. Cancer incidence  
9 data from the Detroit metropolitan area were collected by the Michigan Cancer Surveillance  
10 Program, Community Health Administration, Lansing, Michigan. The Florida cancer incidence  
11 data used in this report were collected by the Florida Cancer Data System (Miami, Florida) under  
12 contract with the Florida Department of Health, Tallahassee, Florida. The views expressed herein  
13 are solely those of the authors and do not necessarily reflect those of the FCDC or FDOH.  
14 Cancer incidence data from Louisiana were collected by the Louisiana Tumor Registry,  
15 Louisiana State University Health Sciences Center School of Public Health, New Orleans,  
16 Louisiana. Cancer incidence data from New Jersey were collected by the New Jersey State  
17 Cancer Registry, The Rutgers Cancer Institute of New Jersey, New Brunswick, New Jersey.  
18 Cancer incidence data from North Carolina were collected by the North Carolina Central Cancer  
19 Registry, Raleigh, North Carolina. Cancer incidence data from Pennsylvania were supplied by  
20 the Division of Health Statistics and Research, Pennsylvania Department of Health, Harrisburg,  
21 Pennsylvania. The Pennsylvania Department of Health specifically disclaims responsibility for  
22 any analyses, interpretations or conclusions. Cancer incidence data from Arizona were collected  
23 by the Arizona Cancer Registry, Division of Public Health Services, Arizona Department of  
24 Health Services, Phoenix, Arizona. Cancer incidence data from Texas were collected by the  
25 Texas Cancer Registry, Cancer Epidemiology and Surveillance Branch, Texas Department of  
26 State Health Services, Austin, Texas. Cancer incidence data from Nevada were collected by the  
27 Nevada Central Cancer Registry, Division of Public and Behavioral Health, State of Nevada  
28 Department of Health and Human Services, Carson City, Nevada.

29  
30 We are indebted to the participants in the NIH-AARP Diet and Health Study for their  
31 outstanding cooperation. We also thank Sigurd Hermansen and Kerry Grace Morrissey from  
32 Westat for study outcomes ascertainment and management and Leslie Carroll at Information  
33 Management Services for data support and analysis.

34  
35 The authors want to gratefully acknowledge and thank Drs. Rachel Ballard-Barbash and Jill  
36 Reedy for their invaluable feedback on the manuscript.

37  
38 **Competing Interests:** None declared

39  
40 **Funding Support:** The content of this manuscript was developed with funding from the  
41 National Cancer Institute at the National Institutes of Health (U01-CA1517361, PI: Doubeni).  
42 The contents of this manuscript do not necessarily reflect the views of the funding agencies and  
43 you should not assume endorsement by the Federal Government.

44  
45 Research reported in this publication was supported by the National Institute of Minority Health  
46 and Health Disparities of the National Institutes of Health under Award Number P60MD006912  
47 (PI: Allison). The content is solely the responsibility of the authors and does not necessarily  
48 represent the official views of the National Institutes of Health.

1  
2  
3  
4  
5  
6  
7  
8  
9  
10  
11  
12  
13  
14  
15  
16  
17  
18  
19  
20  
21  
22  
23  
24  
25  
26  
27  
28  
29  
30  
31  
32  
33  
34  
35  
36  
37  
38  
39  
40  
41  
42  
43  
44  
45  
46  
47  
48  
49  
50  
51  
52  
53  
54  
55  
56  
57  
58  
59  
60

Partial support for Dr. Waring provided by NIH grants KL2TR000160 and U01HL105268.

Dr. Cutrona was supported by the National Center for Advancing Translational Sciences of the National Institutes of Health under award number KL2TR000160. The content is solely the responsibility of the authors and does not necessarily represent the official views of the NIH.

For peer review only

## References

1. Society AC. Cancer Facts & Figures Atlanta, 2016.
2. Huxley RR, Ansary-Moghaddam A, Clifton P, et al. The impact of dietary and lifestyle risk factors on risk of colorectal cancer: a quantitative overview of the epidemiological evidence. *Int J Cancer* 2009;125(1):171-80. doi: 10.1002/ijc.24343 [published Online First: 2009/04/08]
3. Stoneham M, Goldacre M, Seagroatt V, et al. Olive oil, diet and colorectal cancer: an ecological study and a hypothesis. *J Epidemiol Community Health* 2000;54(10):756-60. [published Online First: 2000/09/16]
4. Kontou N, Psaltopoulou T, Soupos N, et al. The mediating effect of Mediterranean diet on the relation between smoking and colorectal cancer: a case-control study. *Eur J Public Health* 2012 doi: cks109 [pii]  
10.1093/eurpub/cks109 [published Online First: 2012/08/22]
5. Fuchs CS, Giovannucci EL, Colditz GA, et al. Dietary fiber and the risk of colorectal cancer and adenoma in women. *N Engl J Med* 1999;340(3):169-76. doi: 10.1056/NEJM199901213400301 [published Online First: 1999/01/23]
6. Park Y, Hunter DJ, Spiegelman D, et al. Dietary fiber intake and risk of colorectal cancer: a pooled analysis of prospective cohort studies. *JAMA* 2005;294(22):2849-57. doi: 294/22/2849 [pii]  
10.1001/jama.294.22.2849 [published Online First: 2005/12/15]
7. Aune D, Chan DS, Lau R, et al. Dietary fibre, whole grains, and risk of colorectal cancer: systematic review and dose-response meta-analysis of prospective studies. *BMJ* 2011;343:d6617. [published Online First: 2011/11/15]
8. Doubeni CA, Major JM, Laiyemo AO, et al. Contribution of Behavioral Risk Factors and Obesity to Socioeconomic Differences in Colorectal Cancer Incidence. *JNCI Journal of the National Cancer Institute* 2012;104(18):1353-62. doi: 10.1093/jnci/djs346
9. Larsson SC, Wolk A. Obesity and colon and rectal cancer risk: a meta-analysis of prospective studies. *Am J Clin Nutr* 2007;86(3):556-65. doi: 86/3/556 [pii] [published Online First: 2007/09/08]
10. Moghaddam AA, Woodward M, Huxley R. Obesity and risk of colorectal cancer: a meta-analysis of 31 studies with 70,000 events. *Cancer Epidemiol Biomarkers Prev* 2007;16(12):2533-47. doi: 16/12/2533 [pii]  
10.1158/1055-9965.EPI-07-0708 [published Online First: 2007/12/19]
11. Howard RA, Freedman DM, Park Y, et al. Physical activity, sedentary behavior, and the risk of colon and rectal cancer in the NIH-AARP Diet and Health Study. *Cancer Causes Control* 2008;19(9):939-53. doi: 10.1007/s10552-008-9159-0 [published Online First: 2008/04/26]
12. Siegel EM, Ulrich CM, Poole EM, et al. The effects of obesity and obesity-related conditions on colorectal cancer prognosis. *Cancer Control* 2010;17(1):52-7. [published Online First: 2009/12/17]
13. Reedy J, Mitrou PN, Krebs-Smith SM, et al. Index-based dietary patterns and risk of colorectal cancer: the NIH-AARP Diet and Health Study. *Am J Epidemiol* 2008;168(1):38-48. doi: kwn097 [pii]  
10.1093/aje/kwn097 [published Online First: 2008/06/06]
14. Bamia C, Lagiou P, Buckland G, et al. Mediterranean diet and colorectal cancer risk: results from a European cohort. *Eur J Epidemiol* 2013;28(4):317-28. doi: 10.1007/s10654-013-9795-x
15. Lee DH, Keum N, Giovannucci EL. Colorectal Cancer Epidemiology in the Nurses' Health Study. *American Journal of Public Health* 2016;106(9):1599-607. doi: 10.2105/AJPH.2016.303320

16. Pignone M, Rich M, Teutsch SM, et al. Screening for colorectal cancer in adults at average risk: a summary of the evidence for the U.S. Preventive Services Task Force. *Ann Intern Med* 2002;137(2):132-41.
17. Lebowitz B, Capiak K, Neugut AI, et al. Risk of colorectal adenomas and advanced neoplasia in Hispanic, black and white patients undergoing screening colonoscopy. *Aliment Pharmacol Ther* 2012;35(12):1467-73. doi: 10.1111/j.1365-2036.2012.05119.x
18. Platz EA, Willett WC, Colditz GA, et al. Proportion of colon cancer risk that might be preventable in a cohort of middle-aged US men. *Cancer Causes Control* 2000;11(7):579-88.
19. Ogden CL, Carroll MD, Kit BK, et al. Prevalence of childhood and adult obesity in the United States, 2011-2012. *JAMA* 2014;311(8):806-14. doi: 10.1001/jama.2014.732
20. Wang DD, Leung CW, Li Y, et al. Trends in dietary quality among adults in the United States, 1999 through 2010. *JAMA Internal Medicine* 2014;174(10):1587-95. doi: 10.1001/jamainternmed.2014.3422
21. Krebs-Smith SM, Guenther PM, Subar AF, et al. Americans Do Not Meet Federal Dietary Recommendations. *The Journal of Nutrition* 2010;140(10):1832-38. doi: 10.3945/jn.110.124826
22. Amine E, Baba N, Belhadj M, et al. Diet, nutrition and the prevention of chronic diseases: report of a Joint WHO/FAO Expert Consultation: World Health Organization 2002.
23. Sacks FM, Obarzanek E, Windhauser MM, et al. Rationale and design of the Dietary Approaches to Stop Hypertension trial (DASH): a multicenter controlled-feeding study of dietary patterns to lower blood pressure. *Annals of Epidemiology* 1995;5(2):108-18.
24. Knopps KB, de Groot LM, Kromhout D, et al. Mediterranean diet, lifestyle factors, and 10-year mortality in elderly European men and women: The Hale project. *JAMA* 2004;292(12):1433-39. doi: 10.1001/jama.292.12.1433
25. Jensen MD, Ryan DH, Apovian CM, et al. 2013 AHA/ACC/TOS Guideline for the Management of Overweight and Obesity in Adults: A Report of the American College of Cardiology/American Heart Association Task Force on Practice Guidelines and The Obesity Society. *Journal of the American College of Cardiology* 2014;63(25\_PA) doi: 10.1016/j.jacc.2013.11.004
26. Schatzkin A, Subar AF, Thompson FE, et al. Design and serendipity in establishing a large cohort with wide dietary intake distributions: the National Institutes of Health-American Association of Retired Persons Diet and Health Study. *Am J Epidemiol* 2001;154(12):1119-25.
27. Thompson FE, Subar AF, Brown CC, et al. Cognitive research enhances accuracy of food frequency questionnaire reports: results of an experimental validation study. *Journal of the American Dietetic Association* 2002;102(2):212-25.
28. Thompson FE, Kipnis V, Midthune D, et al. Performance of a food-frequency questionnaire in the US NIH-AARP (National Institutes of Health-American Association of Retired Persons) Diet and Health Study. *Public Health Nutr* 2008;11(2):183-95. doi: 10.1017/S1368980007000419
29. Guenther PM, Kirkpatrick SI, Reedy J, et al. The Healthy Eating Index-2010 is a valid and reliable measure of diet quality according to the 2010 Dietary Guidelines for Americans. *J Nutr* 2014;144(3):399-407. doi: 10.3945/jn.113.183079
30. Fung TT, Hu FB, McCullough ML, et al. Diet Quality Is Associated with the Risk of Estrogen Receptor-Negative Breast Cancer in Postmenopausal Women. *The Journal of Nutrition* 2006;136(2):466-72.
31. Reedy J, Krebs-Smith SM, Miller PE, et al. Higher diet quality is associated with decreased risk of all-cause, cardiovascular disease, and cancer mortality among older adults. *J Nutr* 2014;144(6):881-9. doi: 10.3945/jn.113.189407
32. Mitrou PN, Kipnis V, Thiebaut AC, et al. Mediterranean dietary pattern and prediction of all-cause mortality in a US population: results from the NIH-AARP Diet and Health Study. *Arch Intern Med* 2007;167(22):2461-8. doi: 10.1001/archinternmed.2007.2461 [pii]



- 1  
2  
3 10.1001/archinte.167.22.2461 [published Online First: 2007/12/12]  
4  
5 33. Appel LJ, Moore TJ, Obarzanek E, et al. A clinical trial of the effects of dietary patterns on blood  
6 pressure. *New England Journal of Medicine* 1997;336(16):1117-24.  
7  
8 34. Xu J, Long S. Confidence intervals for predicted outcomes in regression models for categorical  
9 outcomes. *The Stata Journal* 2005;5(4):537-59.  
10  
11 35. Cleves M, Gould W, Gutierrez RG, et al. An Introduction to Survival Analysis Using Stata, Third Edition  
12 College Station, TX: Stata Press 2010.  
13  
14 36. Miller PE, Lesko SM, Muscat JE, et al. Dietary patterns and colorectal adenoma and cancer risk: a  
15 review of the epidemiological evidence. *Nutr Cancer* 2010;62(4):413-24. doi:  
16 10.1080/01635580903407114  
17  
18 37. Miller PE, Cross AJ, Subar AF, et al. Comparison of 4 established DASH diet indexes: examining  
19 associations of index scores and colorectal cancer. *Am J Clin Nutr* 2013;98(3):794-803. doi:  
20 10.3945/ajcn.113.063602  
21  
22 38. Sandhu MS, Dunger DB, Giovannucci EL. Insulin, Insulin-Like Growth Factor-I (IGF-I), IGF Binding  
23 Proteins, Their Biologic Interactions, and Colorectal Cancer. *Journal of the National Cancer*  
24 *Institute* 2002;94(13):972-80.  
25  
26 39. Pereira MA, Jacobs Jr DR, Van Horn L, et al. Dairy consumption, obesity, and the insulin resistance  
27 syndrome in young adults: the CARDIA Study. *Jama* 2002;287(16):2081-89.  
28  
29 40. Jacobs ET, Thompson PA, Martinez ME. Diet, gender, and colorectal neoplasia. *Journal of clinical*  
30 *gastroenterology* 2007;41(8):731-46. doi: 10.1097/MCG.0b013e3180338e56  
31  
32 41. Moore LV, Diez Roux AV, Nettleton JA, et al. Associations of the Local Food Environment with Diet  
33 Quality—A Comparison of Assessments based on Surveys and Geographic Information Systems:  
34 The Multi-Ethnic Study of Atherosclerosis. *American Journal of Epidemiology* 2008;167(8):917-  
35 24. doi: 10.1093/aje/kwm394  
36  
37 42. Horowitz CR, Colson KA, Hebert PL, et al. Barriers to buying healthy foods for people with diabetes:  
38 evidence of environmental disparities. *Am J Public Health* 2004;94(9):1549-54.  
39  
40 43. Sofi F, Cesari F, Abbate R, et al. Adherence to Mediterranean diet and health status: meta-analysis.  
41 *BMJ* 2008;337:a1344. [published Online First: 2008/09/13]  
42  
43 44. Trichopoulou A, Costacou T, Bamia C, et al. Adherence to a Mediterranean diet and survival in a  
44 Greek population. *N Engl J Med* 2003;348(26):2599-608. doi: 10.1056/NEJMoa025039  
45  
46 45. Subar AF, Kipnis V, Troiano RP, et al. Using intake biomarkers to evaluate the extent of dietary  
47 misreporting in a large sample of adults: the OPEN study. *Am J Epidemiol* 2003;158(1):1-13.  
48  
49 46. Kipnis V, Subar AF, Midthune D, et al. Structure of dietary measurement error: results of the OPEN  
50 biomarker study. *American Journal of Epidemiology* 2003;158(1):14-21.  
51  
52 47. Ward E, Jemal A, Cokkinides V, et al. Cancer disparities by race/ethnicity and socioeconomic status.  
53 *CA Cancer J Clin* 2004;54(2):78-93.  
54  
55 48. Irby K, Anderson WF, Henson DE, et al. Emerging and widening colorectal carcinoma disparities  
56 between Blacks and Whites in the United States (1975-2002). *Cancer Epidemiol Biomarkers Prev*  
57 2006;15(4):792-7. doi: 10.1158/1055-9965.EPI-05-0879  
58  
59  
60

## STROBE Statement—checklist of items that should be included in reports of observational studies

|                              | Item No | Recommendation                                                                                                                                                                                                                                                                                                                                                                                                                                                                                                                                                                                                                                                                                                                    |
|------------------------------|---------|-----------------------------------------------------------------------------------------------------------------------------------------------------------------------------------------------------------------------------------------------------------------------------------------------------------------------------------------------------------------------------------------------------------------------------------------------------------------------------------------------------------------------------------------------------------------------------------------------------------------------------------------------------------------------------------------------------------------------------------|
| <b>Title and abstract</b>    | 1       | (a) Indicate the study's design with a commonly used term in the title or the abstract <u><a href="#">see pg. 1</a></u><br>(b) Provide in the abstract an informative and balanced summary of what was done and what was found <u><a href="#">see pg. 2</a></u>                                                                                                                                                                                                                                                                                                                                                                                                                                                                   |
| <b>Introduction</b>          |         |                                                                                                                                                                                                                                                                                                                                                                                                                                                                                                                                                                                                                                                                                                                                   |
| Background/rationale         | 2       | Explain the scientific background and rationale for the investigation being reported <u><a href="#">see pgs. 4-5</a></u>                                                                                                                                                                                                                                                                                                                                                                                                                                                                                                                                                                                                          |
| Objectives                   | 3       | State specific objectives, including any prespecified hypotheses <u><a href="#">see pgs. 4-5</a></u>                                                                                                                                                                                                                                                                                                                                                                                                                                                                                                                                                                                                                              |
| <b>Methods</b>               |         |                                                                                                                                                                                                                                                                                                                                                                                                                                                                                                                                                                                                                                                                                                                                   |
| Study design                 | 4       | Present key elements of study design early in the paper <u><a href="#">see pg. 5</a></u>                                                                                                                                                                                                                                                                                                                                                                                                                                                                                                                                                                                                                                          |
| Setting                      | 5       | Describe the setting, locations, and relevant dates, including periods of recruitment, exposure, follow-up, and data collection                                                                                                                                                                                                                                                                                                                                                                                                                                                                                                                                                                                                   |
| Participants                 | 6       | (a) <i>Cohort study</i> —Give the eligibility criteria, and the sources and methods of selection of participants. Describe methods of follow-up<br><i>Case-control study</i> —Give the eligibility criteria, and the sources and methods of case ascertainment and control selection. Give the rationale for the choice of cases and controls<br><i>Cross-sectional study</i> —Give the eligibility criteria, and the sources and methods of selection of participants <u><a href="#">see pg. 5</a></u><br>(b) <i>Cohort study</i> —For matched studies, give matching criteria and number of exposed and unexposed<br><i>Case-control study</i> —For matched studies, give matching criteria and the number of controls per case |
| Variables                    | 7       | Clearly define all outcomes, exposures, predictors, potential confounders, and effect modifiers. Give diagnostic criteria, if applicable <u><a href="#">see pgs. 6-8</a></u>                                                                                                                                                                                                                                                                                                                                                                                                                                                                                                                                                      |
| Data sources/<br>measurement | 8*      | For each variable of interest, give sources of data and details of methods of assessment (measurement). Describe comparability of assessment methods if there is more than one group                                                                                                                                                                                                                                                                                                                                                                                                                                                                                                                                              |
| Bias                         | 9       | Describe any efforts to address potential sources of bias                                                                                                                                                                                                                                                                                                                                                                                                                                                                                                                                                                                                                                                                         |
| Study size                   | 10      | Explain how the study size was arrived at                                                                                                                                                                                                                                                                                                                                                                                                                                                                                                                                                                                                                                                                                         |
| Quantitative variables       | 11      | Explain how quantitative variables were handled in the analyses. If applicable, describe which groupings were chosen and why                                                                                                                                                                                                                                                                                                                                                                                                                                                                                                                                                                                                      |
| Statistical methods          | 12      | (a) Describe all statistical methods, including those used to control for confounding<br>(b) Describe any methods used to examine subgroups and interactions<br>(c) Explain how missing data were addressed<br>(d) <i>Cohort study</i> —If applicable, explain how loss to follow-up was addressed<br><i>Case-control study</i> —If applicable, explain how matching of cases and controls was addressed<br><i>Cross-sectional study</i> —If applicable, describe analytical methods taking account of sampling strategy <u><a href="#">see pgs. 8-9</a></u><br>(e) Describe any sensitivity analyses                                                                                                                             |

Continued on next page

**Results**

|                  |     |                                                                                                                                                                                                                                                                                                                                                                                                                                     |
|------------------|-----|-------------------------------------------------------------------------------------------------------------------------------------------------------------------------------------------------------------------------------------------------------------------------------------------------------------------------------------------------------------------------------------------------------------------------------------|
| Participants     | 13* | (a) Report numbers of individuals at each stage of study—eg numbers potentially eligible, examined for eligibility, confirmed eligible, included in the study, completing follow-up, and analysed <u>see pg. 8</u><br>(b) Give reasons for non-participation at each stage<br>(c) Consider use of a flow diagram                                                                                                                    |
| Descriptive data | 14* | (a) Give characteristics of study participants (eg demographic, clinical, social) and information on exposures and potential confounders <u>see pgs. 9-11</u><br>(b) Indicate number of participants with missing data for each variable of interest <u>see pg. 8</u><br>(c) <i>Cohort study</i> —Summarise follow-up time (eg, average and total amount)                                                                           |
| Outcome data     | 15* | <i>Cohort study</i> —Report numbers of outcome events or summary measures over time<br><i>Case-control study</i> —Report numbers in each exposure category, or summary measures of exposure<br><i>Cross-sectional study</i> —Report numbers of outcome events or summary measures <u>see pg. 6</u>                                                                                                                                  |
| Main results     | 16  | (a) Give unadjusted estimates and, if applicable, confounder-adjusted estimates and their precision (eg, 95% confidence interval). Make clear which confounders were adjusted for and why they were included <u>see pgs. 11-15</u><br>(b) Report category boundaries when continuous variables were categorized<br>(c) If relevant, consider translating estimates of relative risk into absolute risk for a meaningful time period |
| Other analyses   | 17  | Report other analyses done—eg analyses of subgroups and interactions, and sensitivity analyses                                                                                                                                                                                                                                                                                                                                      |

**Discussion**

|                  |    |                                                                                                                                                                                                  |
|------------------|----|--------------------------------------------------------------------------------------------------------------------------------------------------------------------------------------------------|
| Key results      | 18 | Summarise key results with reference to study objectives <u>see pgs. 16-19</u>                                                                                                                   |
| Limitations      | 19 | Discuss limitations of the study, taking into account sources of potential bias or imprecision. Discuss both direction and magnitude of any potential bias <u>see pg. 18</u>                     |
| Interpretation   | 20 | Give a cautious overall interpretation of results considering objectives, limitations, multiplicity of analyses, results from similar studies, and other relevant evidence <u>see pgs. 16-18</u> |
| Generalisability | 21 | Discuss the generalisability (external validity) of the study results <u>see pgs. 16-18</u>                                                                                                      |

**Other information**

|         |    |                                                                                                                                                                                     |
|---------|----|-------------------------------------------------------------------------------------------------------------------------------------------------------------------------------------|
| Funding | 22 | Give the source of funding and the role of the funders for the present study and, if applicable, for the original study on which the present article is based <u>see pgs. 19-20</u> |
|---------|----|-------------------------------------------------------------------------------------------------------------------------------------------------------------------------------------|

\*Give information separately for cases and controls in case-control studies and, if applicable, for exposed and unexposed groups in cohort and cross-sectional studies.

**Note:** An Explanation and Elaboration article discusses each checklist item and gives methodological background and published examples of transparent reporting. The STROBE checklist is best used in conjunction with this article (freely available on the Web sites of PLoS Medicine at <http://www.plosmedicine.org/>, Annals of Internal Medicine at <http://www.annals.org/>, and Epidemiology at <http://www.epidem.com/>). Information on the STROBE Initiative is available at [www.strobe-statement.org](http://www.strobe-statement.org).

# BMJ Open

## The Association of Dietary Quality with Colorectal Cancer among Normal Weight, Overweight, and Obese Men and Women: A Prospective Longitudinal Study

|                                 |                                                                                                                                                                                                                                                                                                                                                                                                                                                                                                                                                                                                                                                                                    |
|---------------------------------|------------------------------------------------------------------------------------------------------------------------------------------------------------------------------------------------------------------------------------------------------------------------------------------------------------------------------------------------------------------------------------------------------------------------------------------------------------------------------------------------------------------------------------------------------------------------------------------------------------------------------------------------------------------------------------|
| Journal:                        | <i>BMJ Open</i>                                                                                                                                                                                                                                                                                                                                                                                                                                                                                                                                                                                                                                                                    |
| Manuscript ID                   | bmjopen-2016-015619.R1                                                                                                                                                                                                                                                                                                                                                                                                                                                                                                                                                                                                                                                             |
| Article Type:                   | Research                                                                                                                                                                                                                                                                                                                                                                                                                                                                                                                                                                                                                                                                           |
| Date Submitted by the Author:   | 16-Feb-2017                                                                                                                                                                                                                                                                                                                                                                                                                                                                                                                                                                                                                                                                        |
| Complete List of Authors:       | Torres Stone, Rosalie; Clark University, Sociology; University of Massachusetts Medical School, Psychiatry<br>Waring, Molly; University of Massachusetts Medical School, Department of Quantitative Health Sciences<br>Cutrona, Sarah; University of Massachusetts Medical School, Department of Medicine<br>Kiefe, Catarina; UMass Medical School, Quantitative Health Sciences<br>Allison, Jeroan; University of Massachusetts Worcester, Department of Quantitative Health Sciences<br>Doubeni, Chyke A; University of Pennsylvania Perelman School of Medicine, Department of Family Medicine and Community Health, and the Center for Clinical Epidemiology and Biostatistics |
| <b>Primary Subject Heading</b>: | Oncology                                                                                                                                                                                                                                                                                                                                                                                                                                                                                                                                                                                                                                                                           |
| Secondary Subject Heading:      | Gastroenterology and hepatology, Epidemiology, Oncology, Public health                                                                                                                                                                                                                                                                                                                                                                                                                                                                                                                                                                                                             |
| Keywords:                       | EPIDEMIOLOGY, Gastroenterology < INTERNAL MEDICINE, NUTRITION & DIETETICS                                                                                                                                                                                                                                                                                                                                                                                                                                                                                                                                                                                                          |
|                                 |                                                                                                                                                                                                                                                                                                                                                                                                                                                                                                                                                                                                                                                                                    |

SCHOLARONE™  
Manuscripts

1  
2  
3  
4  
5  
6  
7  
8  
9 **Title: The Association of Dietary Quality with Colorectal Cancer among Normal Weight,**  
10 **Overweight, and Obese Men and Women: A Prospective Longitudinal Study**  
11  
12

13  
14  
15 Rosalie A. Torres Stone,<sup>1,2</sup> Molly E. Waring,<sup>3</sup> Sarah L. Cutrona,<sup>4</sup>  
16 Catarina I. Kiefe,<sup>3</sup> Jeroan Allison,<sup>3</sup> Chyke A. Doubeni<sup>5</sup>  
17  
18

19 <sup>1</sup>Clark University, Sociology Department, Worcester, Ma 01655 USA; <sup>2</sup>Systems and  
20 Psychosocial Advances Research Center (SPARC), Department of Psychiatry, University of  
21 Massachusetts Medical School, 222 Maple Avenue, Shrewsbury, MA 01545 USA, <sup>3</sup>Department  
22 of Quantitative Health Sciences, University of Massachusetts Medical School, Worcester, MA  
23 01605 USA; <sup>4</sup>Department of Medicine, University of Massachusetts Medical School, Worcester,  
24 MA 01605 USA <sup>5</sup>Department of Family Medicine and Community Health, and the Center for  
25 Clinical Epidemiology and Biostatistics, Perelman School of Medicine, University of  
26 Pennsylvania, Philadelphia, PA USA 19104  
27  
28  
29  
30

31  
32 **Author Note**  
33

34 Correspondence concerning this article should be addressed to Rosalie A. Torres Stone, 950  
35 Main Street, Clark University, Sociology Department, Worcester MA 01655, USA. E-mail:  
36 [rtorresstone@clarku.edu](mailto:rtorresstone@clarku.edu); Phone: 508-793-7376; Fax: 508-793-8854  
37  
38

39  
40 **Key Words:** colorectal cancer, diet, food, and nutrition, body mass index  
41  
42

43 **Manuscript Word Count: 3,209**  
44  
45  
46  
47  
48  
49  
50  
51  
52  
53  
54  
55  
56  
57  
58  
59  
60

**ABSTRACT**

**Objective:** Lower body mass index (BMI) and higher dietary quality reduces the risk of colorectal cancer (CRC) risk, but we lack a full understanding of how this association varies according to BMI for men and women.

**Methods:** We used data from the NIH-AARP Diet and Health Study consisting of 398,458 persons who were 50-71 years old in 1995-1996 and followed through 2006. Exposures were dietary quality as reflected by the Mediterranean Diet, the Healthy Eating Index-2010, and the Dietary Approaches to Stop Hypertension score, stratified by BMI category. The outcome was CRC diagnosis from cancer registry data. Cox Regression models adjusted for disease risk factors.

**Results:** Over a mean duration of 123 months of follow-up, there were 6,515 new diagnoses of colorectal cancer (1,953 among the normal weight, 2,924 among the overweight, and 1,638 among the obese; 4,483 among men and 2,032 among women). For normal-weight and overweight men, dietary adherence in the highest tertile (versus the lowest tertile) was associated with 25-30% lower CRC risk for each of the three measures. In addition, a gradient effect linked increasing dietary adherence with decreasing CRC risk. The associations were of borderline significance and inconsistent across the three dietary measures for obese men and women in all BMI categories.

**Conclusion:** These findings illustrate the value of healthy eating habits among men who normal weight and provide evidence to inform new strategies for cancer prevention.

**Public Health Implications:** The findings accentuate the need to establish strategies to improve diet quality and prevent obesity as a cancer prevention strategy.

**Word Count: 255**

1  
2  
3 **Key Words:** colorectal cancer, diet, food, and nutrition, body mass index

4 **Article Summary**

5  
6  
7 **Strengths and Limitations**

- 8  
9
- 10 • To our knowledge, this is the first study to examine the potential benefits of healthy eating patterns in reducing colorectal cancer risk among men and women who are at normal weight, overweight and obese adults.
  - 11 • In this longitudinal national study of 398,458 adults, we found that among normal weight and overweight men, colorectal cancer risk was 25-30% lower with high adherence to each dietary measure (Mediterranean Diet, Healthy Eating Index-2010, and the Dietary Approaches to Stop Hypertension). Findings were inconsistent among obese men and women of all weight categories.
  - 12 • Dietary intake was self-reported and assessed using a single baseline Food Frequency Questionnaire, thus, there is potential for non-differential measurement error. With only a single measure, we could not examine changes in dietary intake over time. Over 90% of the sample was non-Hispanic white. Research is needed to examine whether associations are similar in other racial/ethnic groups and to better understand the inconsistency in the results for women.
- 13  
14  
15  
16  
17  
18  
19  
20  
21  
22  
23  
24  
25  
26  
27

28 **Contributors**

29 All authors read and approved the final version of the manuscript. Rosalie A. Torres Stone drafted the original manuscript and interpreted the findings, Chyke A. Doubeni conceived of the study and participated in the analyses and interpretation of the data. Jeroan Allison and Molly E. Waring conducted the analyses and interpreted the data. Sarah L. Cutrona and Catarina I. Kiefe contributed to the interpretation of the findings and critically revised the manuscript.

30  
31  
32  
33  
34  
35  
36  
37

38 **Extra data is available:**

39 Extra data is available by submitting a proposal for each project/manuscript for review by the NIH AARP Steering Committee prior to accessing NIH AARP data and to developing an associated manuscript. A proposal must be submitted through the public website, NIH-AARP Diet & Health Study Tracking and Review System (STaRS, <https://www.nihaarpstars.com>).

40  
41  
42  
43  
44  
45  
46

47 **Data sharing:**

48 No additional data is available.

49  
50  
51

52 **Ethical approval:**

53 Not required. The data is de-identified.

54  
55  
56  
57  
58  
59  
60

1  
2  
3  
4  
5 **Word Count: 3,209**  
6

7 **INTRODUCTION**  
8

9  
10 Colorectal cancer (CRC) is the third leading cause of cancer-related deaths in the United  
11 States, claiming over 49,190 lives in 2016.<sup>1</sup> Modifiable risk factors such as excess body weight  
12 and unhealthy behaviors (sedentary lifestyles, unhealthy dietary patterns, and smoking) increase  
13 the risk of CRC.<sup>2-15</sup> Most colorectal cancers are preventable through screening, detection and  
14 removal of precancerous lesions, or by engaging in healthful behaviors.<sup>16 17</sup> More specifically, it  
15 has been estimated that up to 70% of colorectal cancers could be avoided by risk factor  
16 modification.<sup>18</sup>  
17  
18  
19  
20  
21  
22  
23  
24  
25

26 Obesity is a particularly concerning risk factor, as 37% of U.S. adults are obese.<sup>19</sup> A  
27 recent meta-analysis found a 30% higher risk of colon cancer in men and a 12% higher risk in  
28 women for every 5-kg/m<sup>2</sup> increase in body mass index (BMI).<sup>9</sup> Another meta-analysis found  
29 that obese adults were at roughly 20% greater risk of developing CRC compared with those of  
30 normal weight, and the risk of CRC increased 7% for every 2-kg/m<sup>2</sup> higher BMI.<sup>10</sup>  
31  
32  
33  
34  
35  
36  
37

38 Like obesity, diet is estimated to be one of the most important modifiable risk factors for  
39 CRC.<sup>13-15</sup> A dietary pattern that is rich in whole grains, vegetables, fruit, fish, legumes, and nuts  
40 and low in red and processed meat and alcohol has been linked to a substantial reduction in the  
41 risk of CRC.<sup>2-7 13 14</sup> Therefore, the World Health Organization recommends improving dietary  
42 quality by increasing consumption of fruit and vegetables, as well as legumes, whole grains, and  
43 nuts.<sup>20</sup> These recommendations are similar to those studied in the Dietary Approaches to Stop  
44 Hypertension trial,<sup>21 22</sup> and are also similar to recommendations found in the alternate  
45 Mediterranean Diet examined in the Seven Countries Study.<sup>13 23</sup>  
46  
47  
48  
49  
50  
51  
52  
53  
54  
55  
56  
57  
58  
59  
60



1  
2  
3  
4  
5  
6  
7  
8  
9  
10  
11  
12  
13  
14  
15  
16  
17  
18  
19  
20  
21  
22  
23  
24  
25  
26  
27  
28  
29  
30  
31  
32  
33  
34  
35  
36  
37  
38  
39  
40  
41  
42  
43  
44  
45  
46  
47  
48  
49  
50  
51  
52  
53  
54  
55  
56  
57  
58  
59  
60

Despite the potential benefits of a healthy BMI, many overweight and obese adults are not motivated or able to lose weight,<sup>24</sup> raising important questions. In the absence of weight loss, can a healthy diet still reduce CRC risk among overweight or obese adults? Likewise, because diet is emphasized as a means for weight loss, those who may be of normal weight may also lack the motivation to engage in health eating. These considerations raise unanswered questions about how the association of health eating patterns varies by weight categories. Therefore, our study examined the association between dietary quality and the risk of CRC and studied the variation in this association among normal weight, overweight, and obese adults. Because dietary patterns have been observed to be different for men and women analyses were stratified by gender.<sup>13</sup>

## METHODS

We used data from the National Institutes of Health-AARP (formerly the American Association of Retired Persons) Diet and Health Study. The NIH-AARP cohort was established in 1995-1996. AARP members who were contacted, returned questionnaires eliciting information on demographic and anthropometric characteristics, dietary intake, and health-related behaviors. The initial response rate was 18%. Eligible participants were 50 to 71 years old and resided in six U.S. states (California, Florida, Louisiana, New Jersey, North Carolina, and Pennsylvania) and two metropolitan areas (Atlanta, Georgia, and Detroit, Michigan).

## Outcome

The outcome for this analysis was diagnosis with incident adenocarcinoma of the colon/rectum ascertained from tumor registries through December 31, 2006. Cancer diagnosis in participants was determined through probabilistic linkage with 8 state cancer registries. A

1  
2  
3 validation study found that this approach captured approximately 90% of all cancers.<sup>25</sup> Cancer  
4  
5 type and histologic characteristics were obtained from tumor registry data using International  
6  
7 Classification of Diseases – Oncology codes [8000, 8010, 8020, 8140-43, 8210-8211, 8221,  
8  
9 8255, 8261-3, 8480-1, 8490, 8510, and 8574].  
10  
11

## 12 **Determinants**

13  
14  
15 The main determinants for this analysis were three indices of dietary quality. At baseline  
16  
17 in 1995-1996, dietary intake during the past 12 months were assessed using a 124-item Food  
18  
19 Frequency Questionnaire. The NIH-AARP Food Frequency Questionnaire was previously  
20  
21 validated against 24-hour dietary recall in this cohort.<sup>25</sup> The Diet History Questionnaire has been  
22  
23 calibrated,<sup>25 26</sup> and further validation was performed by using two 24-h recalls within a subset of  
24  
25 the NIH-AARP Diet and Health Study.<sup>27</sup> By using the guidance-based food group equivalents  
26  
27 and other nutrient variables, we calculated component and index scores for the Healthy Eating  
28  
29 Index-2010 (HEI-2010),<sup>28</sup> the alternate Mediterranean Diet Score,<sup>29</sup> and the Dietary Approaches  
30  
31 to Stop Hypertension (DASH),<sup>29</sup> according to algorithms described by Reedy et. al.<sup>30</sup>  
32  
33  
34  
35

36  
37 The alternate Mediterranean Diet Score ranges from 0 to 9 with higher scores  
38  
39 corresponding to diets more consistent with a Mediterranean diet. The score was energy  
40  
41 adjusted by multiplying by 2,500 calories for men and 2,000 calories for women and dividing by  
42  
43 reported energy intake.<sup>13 29 31</sup> One point each is given for: intake at or greater than the sex-  
44  
45 specific median for whole grains, vegetables, fruit, fish, legumes, and nuts; intake less than the  
46  
47 sex-specific median for red and processed meat; and the monounsaturated: saturated fat ratio.  
48  
49 Alcohol intake was scored by predetermined cut points for moderate intake (men: 10-25 grams  
50  
51 per day, women: 5-15 grams per day);<sup>13</sup> participants with moderate alcohol intake received 1  
52  
53  
54  
55  
56  
57  
58  
59  
60

1  
2  
3 point; other intakes (none, occasional, excessive) received 0 points. Mediterranean Diet Scores  
4  
5 were energy adjusted.  
6  
7

8 The Healthy Eating Index 2010 was developed for measuring dietary quality based on  
9 federal guidelines.<sup>28</sup> It awards points based on the adequacy of intake in nine categories (total  
10 fruit, whole fruit, total vegetables, greens and beans, whole grains, dairy, total protein foods, and  
11 seafood and plant proteins, and fatty acids) and moderation of intake in three categories (refined  
12 grains, sodium, and empty calories). The Healthy Eating Index 2010 ranges from 0 to 100 with  
13 higher scores indicating better dietary quality. HEIX scores were not energy adjusted.  
14  
15  
16  
17  
18  
19  
20  
21

22 DASH scores capture the diet tested in two DASH randomized controlled feeding trials,<sup>21</sup>  
23  
24<sup>32</sup> which examined the role of dietary patterns on blood pressure. Several versions of the DASH  
25 score exist, and we used the one most commonly found in the literature with U.S. populations.<sup>29</sup>  
26  
27 To derive the score for the DASH Diet, intake was classified into quintiles for the following  
28 categories: fruits, vegetables, nuts and legumes, whole grains, low-fat dairy (higher intake  
29 indicated by higher quintile) and sodium, red and processed meats, and sweetened beverages  
30 (higher intake indicated by lower quintiles).<sup>30</sup> Based on these eight categories, the DASH Score  
31 ranged from 8 to 40, with higher scores indicating better dietary quality. DASH score were  
32 energy adjusted.  
33  
34  
35  
36  
37  
38  
39  
40  
41  
42

43 BMI was calculated from height and weight self-reported at baseline and categorized  
44 based on WHO criteria (normal: 18.5 to < 25 kg/m<sup>2</sup>, overweight: 25 to < 30 kg/m<sup>2</sup>, and obese: ≥  
45 30 kg/m<sup>2</sup>).  
46  
47  
48  
49

## 50 **Covariates**

51

52 Characteristics self-reported at baseline included gender, age (50-54 years, 55-59 years,  
53 60-64 years, 65-69 years, ≥ 70 years), educational level (high school or less, some college, or  
54  
55  
56  
57  
58  
59  
60

college degree), and race/ethnicity (Non-Hispanic White, Non-Hispanic Black, Hispanic, Asian/Pacific Islander, American Indian/Alaskan Native). Other risk factors for CRC included: smoking status (never smoked, former smoker, current smoker) and physical activity.

Participants were asked how often (in the previous 12 months) they engaged in physical activity that lasted  $\geq 20$  minutes and caused increases in breathing or heart rate, or made the participant sweat (never, rarely, 1-3 times per month, 1-2 times per week, 3-4 times per week,  $\geq 5$  more times per week).

### Construction of the analytic sample

Of the 566,398 adults enrolled in the Diet-AARP Health Study, we excluded those who: (1) completed questionnaires by proxy ( $n=15,760$ ); (2) reported a history of end-stage renal disease (1,299); (3) reported a history of cancer (8,902) or had registry confirmed prevalent cancer (50,591); (4) reported a history of colonic or rectal polyps (57,179); (5) reported any first-degree relatives with colon cancer (50,552); (6) were underweight ( $BMI < 18.5 \text{ kg/m}^2$ ) (5,912); (7) were missing height or weight (13,944); or (8) reported implausibly high or low energy intake based on Box-Cox transformation procedures designed for this dataset ( $n=3,534$ ),<sup>27</sup> resulting in an analytic sample of 398,458 adults.

### Statistical Analysis

Univariate characteristics were examined for all variables. Chi-square tests were used to compare characteristics of participants who did and did not develop CRC over the follow-up period for categorical variables, and the ANOVA was used for continuous variables. We examined the multivariable association of participant characteristics with dietary adherence using a linear regression model treating the dietary measures as continuous. Based on known risk factors for CRC, covariates in these models included age, gender, race/ethnicity, education, smoking status, physical activity, and weight category.

1  
2  
3 Next, we examined the association of dietary patterns with incident CRC stratified by  
4 BMI category (normal, overweight, and obese) separately for men and women. Two-level  
5 dietary pattern comparisons were based on the highest and lowest tertiles of adherence.  
6  
7  
8  
9  
10 Bivariate associations were based on the log-rank test.  
11

12  
13 Cox regression with duration of observation as the underlying time metric was used to  
14 calculate the hazard of developing CRC, within BMI category and gender groups. Separate  
15 models were constructed for each dietary index and all models were adjusted for age,  
16  
17  
18  
19  
20  
21  
22  
23  
24  
25  
26  
27  
28  
29  
30  
31  
32  
33  
34  
35  
36  
37  
38  
39  
40  
41  
42  
43  
44  
45  
46  
47  
48  
49  
50  
51  
52  
53  
54  
55  
56  
57  
58  
59  
60

Cox regression with duration of observation as the underlying time metric was used to calculate the hazard of developing CRC, within BMI category and gender groups. Separate models were constructed for each dietary index and all models were adjusted for age, race/ethnicity, smoking, and physical activity. A first set of Cox models took dietary exposure as a dichotomous measure stratifying on gender and weight categories. A second set of Cox regression models was also created across all weight categories that included interaction terms for weight category and dietary adherence. From this second set of models, we predicted the probability of incident CRC at 10 years for each level of dietary quality and weight by raising the baseline hazard at 10 years to the power of the exponentiated linear predictor. Confidence intervals for the predicted probabilities were constructed with the delta method for approximation of complex variance estimates using Taylor linearization.<sup>33</sup> We found no evidence to suggest that proportional hazards assumptions were violated.<sup>34</sup> All analyses were performed with Stata 14.1 (StataCorp LP, College Station, TX).

## RESULTS

At baseline, most participants were  $\geq 60$  years old (61%) and non-Hispanic white (91%); 59% were men (Table 1).

**Table 1. Baseline Characteristics of Sample by Subsequent Diagnosis of Colorectal Cancer over 10 Years of Follow Up, NIH-AARP Diet and Health Study, 1995-2006**

|                                                                                                                                                                  | Overall           | Did Not Develop Colorectal Cancer | Developed Colorectal Cancer | P-value |
|------------------------------------------------------------------------------------------------------------------------------------------------------------------|-------------------|-----------------------------------|-----------------------------|---------|
| N                                                                                                                                                                | 398,458           | 391,943                           | 6,515                       |         |
| <b>Age (years), %</b>                                                                                                                                            |                   |                                   |                             |         |
| <55                                                                                                                                                              | 17.28             | 17.42                             | 7.97                        | <0.001  |
| 55-59                                                                                                                                                            | 22.04             | 22.15                             | 15.25                       |         |
| 60-64                                                                                                                                                            | 26.29             | 26.28                             | 27.50                       |         |
| 65-69                                                                                                                                                            | 30.33             | 30.12                             | 43.29                       |         |
| > 69                                                                                                                                                             | 4.06              | 4.03                              | 5.99                        |         |
| <b>Gender</b>                                                                                                                                                    |                   |                                   |                             |         |
| Female, %                                                                                                                                                        | 40.60             | 40.76                             | 31.19                       | <0.001  |
| <b>Race/Ethnicity, %</b>                                                                                                                                         |                   |                                   |                             |         |
| Non-Hispanic White                                                                                                                                               | 92.31             | 92.30                             | 92.84                       | 0.031   |
| Non-Hispanic-Black                                                                                                                                               | 3.99              | 3.98                              | 4.16                        |         |
| Hispanic                                                                                                                                                         | 1.99              | 2.00                              | 1.65                        |         |
| Asian/Pacific Islander                                                                                                                                           | 1.42              | 1.43                              | 1.06                        |         |
| American Indian/ Alaska Native                                                                                                                                   | 0.29              | 0.29                              | 0.30                        |         |
| <b>Education, %</b>                                                                                                                                              |                   |                                   |                             |         |
| High School                                                                                                                                                      | 26.38             | 26.31                             | 30.40                       | <0.001  |
| Some College                                                                                                                                                     | 34.24             | 34.23                             | 34.86                       |         |
| College Degree                                                                                                                                                   | 39.38             | 39.45                             | 34.74                       |         |
| <b>Smoking Status, %</b>                                                                                                                                         |                   |                                   |                             |         |
| Never                                                                                                                                                            | 37.00             | 37.11                             | 30.71                       | <0.001  |
| Former                                                                                                                                                           | 50.60             | 50.50                             | 56.68                       |         |
| Current                                                                                                                                                          | 12.40             | 12.39                             | 12.61                       |         |
| <b>Physical Activity (<math>\geq 20</math> minutes in past 12 months), %</b>                                                                                     |                   |                                   |                             |         |
| Never                                                                                                                                                            | 4.41              | 4.40                              | 5.32                        | <0.001  |
| Rarely                                                                                                                                                           | 13.63             | 13.61                             | 15.03                       |         |
| 1-2 times/month                                                                                                                                                  | 13.74             | 13.74                             | 13.93                       |         |
| 1-2 times/week                                                                                                                                                   | 21.78             | 21.78                             | 21.51                       |         |
| 2-4 times/week                                                                                                                                                   | 26.99             | 27.01                             | 25.99                       |         |
| 3-5 times/week                                                                                                                                                   | 19.45             | 19.47                             | 18.23                       |         |
| <b>Baseline weight status, %</b>                                                                                                                                 |                   |                                   |                             |         |
| Normal                                                                                                                                                           | 35.09             | 35.18                             | 29.98                       | <0.001  |
| Overweight                                                                                                                                                       | 42.81             | 42.77                             | 44.88                       |         |
| Obese                                                                                                                                                            | 22.10             | 22.05                             | 25.14                       |         |
| <b>Dietary Scores (mean <math>\pm</math> sd)</b>                                                                                                                 |                   |                                   |                             |         |
| Mediterranean Diet                                                                                                                                               | 4.16 $\pm$ 1.71   | 4.15 $\pm$ 1.71                   | 3.99 $\pm$ 1.72             | < 0.001 |
| Health Eating Index                                                                                                                                              | 65.94 $\pm$ 10.75 | 65.97 $\pm$ 10.74                 | 64.42 $\pm$ 11.01           | <0.001  |
| Dietary Approaches to Stop HTN                                                                                                                                   | 23.85 $\pm$ 4.10  | 23.85 $\pm$ 4.11                  | 23.41 $\pm$ 4.11            | <0.001  |
| Weight status was based on BMI (normal weight: 18.5 to < 25 kg/m <sup>2</sup> ; overweight: 25 to < 30 kg/m <sup>2</sup> ; obese: $\geq 30$ kg/m <sup>2</sup> ). |                   |                                   |                             |         |

About 35% of the sample were normal weight, 43% were overweight, and 22% were obese.

Mean (sd; range) scores for dietary quality were 4.2 (1.7; 0 - 9) for the alternate Mediterranean

1  
2  
3 Diet, 65.9 (10.7; 18.2 - 98.4) for the Healthy Eating Index 2010, and 23.8 (4.1; 8 – 37) for the  
4  
5 DASH Diet.  
6  
7

8 Over a mean follow-up duration of 123 months, 6,515 participants (1.64%) were  
9  
10 diagnosed with colorectal cancer. There were 6,515 new diagnoses of colorectal cancer (1,953  
11  
12 among the normal weight, 2,924 among the overweight, and 1,638 among the obese; 4,483  
13  
14 among men and 2,032 among women). Of all new diagnoses, 9.7% were Stage 0; 38.4% were  
15  
16 Stage 1; 14.0% were Stage 2; 22.7% were Stage 3; and 15.3% were Stage 4. The percent of  
17  
18 those diagnosed with colorectal cancer increased moving across BMI categories from normal to  
19  
20 overweight to obese (1.4%, 1.8%, 1.9%; p-value from log-rank trend test < 0.001). Older age,  
21  
22 being male, having lower levels of physical activity, smoking, having less education, being  
23  
24 overweight or obese, and lower diet quality were associated with an increased risk of colorectal  
25  
26 cancer (p < 0.001) (Table 1). Compared to non-Hispanic whites, the incidence of colorectal  
27  
28 cancer was higher for non-Hispanic blacks and lower for Asians/Pacific Islanders (p = 0.031).  
29  
30  
31  
32  
33

34 For the overall population, the hazard of incident colorectal cancer diagnosis was 33.3%  
35  
36 less for women compared to men. Compared to those who had normal weight, the hazard of  
37  
38 incident colorectal cancer diagnosis was 13.1% greater for those who were overweight and  
39  
40 30.6% greater for those who were obese.  
41  
42

43 Results from the linear regression models predicting dietary adherence and the measures  
44  
45 of dietary quality are presented in Table 2.  
46  
47  
48  
49  
50  
51  
52  
53  
54  
55  
56  
57  
58  
59  
60

**Table 2. Multivariable Association of Participant Characteristics with Dietary Patterns, NIH-AARP Diet and Health Study, 1996-2006\***

|                                                                           | Mediterranean Diet |               | Healthy Eating Index |               | DASH Diet |               |
|---------------------------------------------------------------------------|--------------------|---------------|----------------------|---------------|-----------|---------------|
|                                                                           | $\beta$            | 95% CI        | $\beta$              | 95% CI        | $\beta$   | 95% CI        |
| <b>Age (years)</b>                                                        |                    |               |                      |               |           |               |
| <55                                                                       | ---                | ---           |                      |               |           |               |
| 55-59                                                                     | 0.16               | 0.14 – 0.18   | 1.17                 | 1.05 – 1.28   | 0.32      | 0.28 – 0.37   |
| 60-64                                                                     | 0.26               | 0.25 – 0.28   | 2.03                 | 1.92 – 2.14   | 0.63      | 0.59 – 0.68   |
| 65-69                                                                     | 0.31               | 0.30 – 0.33   | 2.62                 | 2.51 – 2.73   | 0.89      | 0.85 – 0.93   |
| > 69                                                                      | 0.37               | 0.34 – 0.41   | 3.10                 | 2.90 – 3.29   | 1.18      | 1.10 – 1.25   |
| <b>Gender</b>                                                             |                    |               |                      |               |           |               |
| Male                                                                      | ---                | ---           |                      |               |           |               |
| Female                                                                    | 0.10               | 0.08 – 0.10   | 3.80                 | 3.72 – 3.87   | 0.39      | 0.36 – 0.41   |
| <b>Race/Ethnicity</b>                                                     |                    |               |                      |               |           |               |
| Non-Hispanic White                                                        | ---                | ---           |                      |               |           |               |
| Non-Hispanic-Black                                                        | 0.31               | 0.28 – 0.34   | 0.78                 | 0.59 – 0.97   | -0.25     | -0.32 – -0.18 |
| Hispanic                                                                  | 0.05               | 0.01 – 0.10   | 0.77                 | 0.51 – 1.03   | 0.09      | -0.01 – 0.19  |
| Asian/Pacific Islander                                                    | 0.01               | -0.04 – 0.06  | -0.36                | -0.67 – -0.06 | -0.64     | -0.76 – -0.52 |
| American Indian/ Alaska Native                                            | 0.07               | -0.04 – 0.18  | 0.10                 | -0.57 – 0.77  | -0.08     | -0.34 – 0.18  |
| <b>Education</b>                                                          |                    |               |                      |               |           |               |
| High School                                                               | ---                | ---           | ---                  | ---           | ---       | ---           |
| Some College                                                              | 0.28               | 0.26 – 0.29   | 1.97                 | 1.87 – 2.06   | 0.59      | 0.55 – 0.63   |
| College Degree                                                            | 0.59               | 0.58 – 0.61   | 3.80                 | 3.70 – 3.89   | 1.29      | 1.26 – 1.33   |
| <b>Smoking Status</b>                                                     |                    |               |                      |               |           |               |
| Never                                                                     | ---                | ---           |                      |               |           |               |
| Former                                                                    | 0.02               | 0.00 – 0.03   | -0.28                | -0.36 – -0.20 | -0.18     | 0.55 – 0.63   |
| Current                                                                   | -0.71              | -0.73 – -0.69 | -5.89                | -6.01 – -5.77 | -1.90     | 1.26 – 1.33   |
| <b>Physical Activity (<math>\geq 20</math> minutes in past 12 months)</b> |                    |               |                      |               |           |               |
| Never                                                                     | ---                | ---           |                      |               |           |               |
| Rarely                                                                    | 0.14               | 0.11 – 0.17   | 1.26                 | 1.07 – 1.46   | 0.09      | 0.01 – 0.16   |
| 1-2 times/month                                                           | 0.30               | 0.27 – 0.33   | 2.71                 | 2.52 – 2.92   | 0.37      | 0.29 – 0.45   |
| 1-2 times/week                                                            | 0.52               | 0.48 – 0.55   | 4.17                 | 3.98 – 4.36   | 0.91      | 0.84 – 0.99   |
| 2-4 times/week                                                            | 0.79               | 0.76 – 0.82   | 6.05                 | 5.86 – 6.24   | 1.72      | 1.64 – 1.79   |
| 3-5 times/week                                                            | 0.88               | 0.84 – 0.91   | 6.52                 | 6.33 – 6.71   | 2.30      | 2.22 – 2.37   |
| <b>Weight Category<sup>†</sup></b>                                        |                    |               |                      |               |           |               |
| Normal                                                                    | ---                | ---           |                      |               |           |               |
| Overweight                                                                | -0.16              | -0.17 – -0.15 | -0.39                | -0.47 – -0.31 | -0.33     | -0.36 – -0.30 |
| Obese                                                                     | -0.31              | -0.32 – -0.29 | -0.88                | -0.98 – -0.78 | -0.38     | -0.42 – -0.35 |

\*From separate linear regression models for each dietary measure.  
<sup>†</sup>Weight categories were based on BMI (normal: 18.5 to < 25 kg/m<sup>2</sup>; overweight: 25 to < 30 kg/m<sup>2</sup>; obese:  $\geq 30$  kg/m<sup>2</sup>).

We found “dose-response” associations for older age, higher education, and more frequent physical activity with higher quality diet. Women had better adherence for all three dietary patterns. For the alternate Mediterranean Diet and Health Eating Index-2010, Non-Hispanic Black and Hispanic individuals exhibited small yet statistically significantly higher scores



compared to those white adults. Separate models for men and women revealed no important differences (data not shown).

The first set of multivariable models examined the association of being in the top (versus bottom) tertile of dietary adherence with the outcome of CRC. Based on these models, which included adjustment for age, gender, race/ethnicity, smoking, and physical activity, the hazards of incident CRC were 25-30% lower for men with high dietary adherence who were of normal weight or who were overweight (Table 3a). Smaller and inconsistent associations were found for men who were obese and for women of all weight categories (Table 3b).

**Table 3a. Hazard Ratios and 95% Confidence Intervals for Incidence of Colorectal Cancer by Baseline Dietary Pattern and Weight Category, NIH-AARP Diet and Health Study for Men, 1996-2006 (n=182,762)**

| Dietary Score                                  | Normal Weight |             | Overweight   |             | Obese        |             |
|------------------------------------------------|---------------|-------------|--------------|-------------|--------------|-------------|
|                                                | Hazard Ratio  | 95% CI      | Hazard Ratio | 95% CI      | Hazard Ratio | 95% CI      |
| <b>Mediterranean Diet</b>                      |               |             |              |             |              |             |
| Low Adherence                                  | ---           | ---         | ---          | ---         | ---          | ---         |
| High Adherence                                 | 0.73          | 0.60 – 0.89 | 0.73         | 0.63 – 0.84 | 0.85         | 0.69 – 1.05 |
| <b>Healthy Eating Index</b>                    |               |             |              |             |              |             |
| Low Adherence                                  | ---           | ---         | ---          | ---         | ---          | ---         |
| High Adherence                                 | 0.70          | 0.58 – 0.84 | 0.74         | 0.65 - 0.84 | 0.84         | 0.70 – 1.02 |
| <b>Dietary Approaches to Stop Hypertension</b> |               |             |              |             |              |             |
| Low Adherence                                  | ---           | ---         | ---          | ---         | ---          | ---         |
| High Adherence                                 | 0.73          | 0.61 – 0.88 | 0.75         | 0.66 - 0.85 | 0.88         | 0.73 – 1.06 |

Cox proportional hazard models adjusted for age, gender, race/ethnicity, smoking, and physical activity. Separate models were developed for each dietary pattern and weight category. Dietary categories (low, high) are based on tertiles of native score. The lowest tertile is the reference group. Weight categories were based on BMI (normal: 18.5 to < 25 kg/m<sup>2</sup>; overweight: 25 to < 30 kg/m<sup>2</sup>; obese: ≥30 kg/m<sup>2</sup>).

**Table 3b. Hazard Ratios and 95% Confidence Intervals for Incidence of Colorectal Cancer by Baseline Dietary Pattern and Weight Category, NIH-AARP Diet and Health Study for Women, 1996-2006 (n=125,281)**

| Dietary Score                                                                                                                                                                                                                                                                                                                                                                                                          | Normal Weight |             | Overweight   |             | Obese        |             |
|------------------------------------------------------------------------------------------------------------------------------------------------------------------------------------------------------------------------------------------------------------------------------------------------------------------------------------------------------------------------------------------------------------------------|---------------|-------------|--------------|-------------|--------------|-------------|
|                                                                                                                                                                                                                                                                                                                                                                                                                        | Hazard Ratio  | 95% CI      | Hazard Ratio | 95% CI      | Hazard Ratio | 95% CI      |
| <b>Mediterranean Diet</b>                                                                                                                                                                                                                                                                                                                                                                                              |               |             |              |             |              |             |
| Low Adherence                                                                                                                                                                                                                                                                                                                                                                                                          | ---           | ---         | ---          | ---         | ---          | ---         |
| High Adherence                                                                                                                                                                                                                                                                                                                                                                                                         | 0.97          | 0.77 – 1.22 | 0.99         | 0.77 – 1.27 | 0.76         | 0.56 – 1.04 |
| <b>Healthy Eating Index</b>                                                                                                                                                                                                                                                                                                                                                                                            |               |             |              |             |              |             |
| Low Adherence                                                                                                                                                                                                                                                                                                                                                                                                          | ---           | ---         | ---          | ---         | ---          | ---         |
| High Adherence                                                                                                                                                                                                                                                                                                                                                                                                         | 0.84          | 0.68 – 1.04 | 0.70         | 0.55 – 0.89 | 0.80         | 0.62 – 1.03 |
| <b>Dietary Approaches to Stop Hypertension</b>                                                                                                                                                                                                                                                                                                                                                                         |               |             |              |             |              |             |
| Low Adherence                                                                                                                                                                                                                                                                                                                                                                                                          | ---           | ---         | ---          | ---         | ---          | ---         |
| High Adherence                                                                                                                                                                                                                                                                                                                                                                                                         | 0.80          | 0.64 – 0.98 | 0.81         | 0.64 – 1.03 | 0.82         | 0.63 – 1.08 |
| Cox proportional hazard models adjusted for age, gender, race/ethnicity, smoking, and physical activity.. Separate models were developed for each dietary pattern and weight category. Dietary adherence categories are based on lowest and highest tertiles. Weight categories were based on BMI (normal: 18.5 to < 25 kg/m <sup>2</sup> ; overweight: 25 to < 30 kg/m <sup>2</sup> ; obese: ≥30 kg/m <sup>2</sup> ). |               |             |              |             |              |             |

Finally, based on the multivariable model Cox regression models, we predicted incidence of new colorectal cancer at 10 years. For this set of models, dietary quality was entered in quintiles. As shown in Table 4a, we found statistically significant linear trends, suggesting a gradient affect associating increasing adherence to high-quality dietary patterns with decreasing incidence of colorectal cancer at 10 years. Gradient effects were strongest for men who were of normal weight or overweight, and less strong for men who were obese. The findings were more mixed for women (Table 4b). For both men and women, the absolute predicted rates of colorectal cancer were consistently less than 2.5%.

1  
2  
3  
4  
5  
6  
7  
8  
9  
10  
11  
12  
13  
14  
15  
16  
17  
18  
19  
20  
21  
22  
23  
24  
25  
26  
27  
28  
29  
30  
31  
32  
33  
34  
35  
36  
37  
38  
39  
40  
41  
42  
43  
44  
45  
46  
47  
48  
49  
50  
51  
52  
53  
54  
55  
56  
57  
58  
59  
60

**Table 4a. Probability and 95% Confidence Interval of Colorectal Cancer at 10 Years by Baseline Dietary Pattern and Weight Category, NIH-AARP Diet and Health Study for Men, 1996-2006 (n=182,762)**

| Dietary Score                                                                                                                                                                                                                                                                                                                                                                                                        | Mediterranean Diet |               | Healthy Eating Index |               | Dietary Approaches to Stop Hypertension |               |
|----------------------------------------------------------------------------------------------------------------------------------------------------------------------------------------------------------------------------------------------------------------------------------------------------------------------------------------------------------------------------------------------------------------------|--------------------|---------------|----------------------|---------------|-----------------------------------------|---------------|
|                                                                                                                                                                                                                                                                                                                                                                                                                      | Probability        | 95% CI        | Probability          | 95% CI        | Probability                             | 95% CI        |
| <b>Normal Weight</b>                                                                                                                                                                                                                                                                                                                                                                                                 |                    |               |                      |               |                                         |               |
| Quintile 1                                                                                                                                                                                                                                                                                                                                                                                                           | 0.018              | 0.010 - 0.259 | 0.019                | 0.011 - 0.027 | 0.019                                   | 0.011 - 0.027 |
| Quintile 2                                                                                                                                                                                                                                                                                                                                                                                                           | 0.016              | 0.001 - 0.024 | 0.017                | 0.009 - 0.025 | 0.017                                   | 0.009 - 0.025 |
| Quintile 3                                                                                                                                                                                                                                                                                                                                                                                                           | 0.014              | 0.007 - 0.021 | 0.015                | 0.008 - 0.021 | 0.015                                   | 0.008 - 0.022 |
| Quintile 4                                                                                                                                                                                                                                                                                                                                                                                                           | 0.014              | 0.007 - 0.020 | 0.013                | 0.007 - 0.191 | 0.015                                   | 0.008 - 0.022 |
| Quintile 5                                                                                                                                                                                                                                                                                                                                                                                                           | 0.011              | 0.005 - 0.157 | 0.012                | 0.006 - 0.018 | 0.012                                   | 0.006 - 0.018 |
| p-for-trend                                                                                                                                                                                                                                                                                                                                                                                                          | 0.0001             |               | <0.0001              |               | 0.0001                                  |               |
| <b>Overweight</b>                                                                                                                                                                                                                                                                                                                                                                                                    |                    |               |                      |               |                                         |               |
| Quintile 1                                                                                                                                                                                                                                                                                                                                                                                                           | 0.200              | 0.011 - 0.029 | 0.022                | 0.012 - 0.032 | 0.021                                   | 0.001 - 0.031 |
| Quintile 2                                                                                                                                                                                                                                                                                                                                                                                                           | 0.017              | 0.009 - 0.025 | 0.017                | 0.009 - 0.025 | 0.018                                   | 0.010 - 0.026 |
| Quintile 3                                                                                                                                                                                                                                                                                                                                                                                                           | 0.017              | 0.009 - 0.025 | 0.016                | 0.009 - 0.024 | 0.016                                   | 0.009 - 0.024 |
| Quintile 4                                                                                                                                                                                                                                                                                                                                                                                                           | 0.014              | 0.008 - 0.021 | 0.018                | 0.009 - 0.026 | 0.016                                   | 0.008 - 0.023 |
| Quintile 5                                                                                                                                                                                                                                                                                                                                                                                                           | 0.015              | 0.008 - 0.022 | 0.014                | 0.007 - 0.020 | 0.016                                   | 0.008 - 0.023 |
| p-for-trend                                                                                                                                                                                                                                                                                                                                                                                                          | 0.0003             |               | <0.0001              |               | <0.0000                                 |               |
| <b>Obese</b>                                                                                                                                                                                                                                                                                                                                                                                                         |                    |               |                      |               |                                         |               |
| Quintile 1                                                                                                                                                                                                                                                                                                                                                                                                           | 0.021              | 0.011 - 0.031 | 0.022                | 0.012 - 0.032 | 0.024                                   | 0.013 - 0.035 |
| Quintile 2                                                                                                                                                                                                                                                                                                                                                                                                           | 0.018              | 0.010 - 0.027 | 0.021                | 0.011 - 0.030 | 0.017                                   | 0.009 - 0.026 |
| Quintile 3                                                                                                                                                                                                                                                                                                                                                                                                           | 0.021              | 0.011 - 0.031 | 0.018                | 0.001 - 0.027 | 0.019                                   | 0.010 - 0.028 |
| Quintile 4                                                                                                                                                                                                                                                                                                                                                                                                           | 0.020              | 0.010 - 0.029 | 0.020                | 0.010 - 0.029 | 0.020                                   | 0.010 - 0.029 |
| Quintile 5                                                                                                                                                                                                                                                                                                                                                                                                           | 0.015              | 0.007 - 0.024 | 0.017                | 0.009 - 0.026 | 0.019                                   | 0.010 - 0.028 |
| p-for-trend                                                                                                                                                                                                                                                                                                                                                                                                          | 0.0944             |               | <0.0184              |               | 0.1150                                  |               |
| Probabilities are based on a Cox model that adjusts for age, gender, race/ethnicity, smoking, and physical activity and include interaction terms for baseline dietary scores and weight category. Separate models were developed for each dietary pattern. Weight categories were based on BMI (normal: 18.5 to < 25 kg/m <sup>2</sup> ; overweight: 25 to < 30 kg/m <sup>2</sup> ; obese: ≥30 kg/m <sup>2</sup> ). |                    |               |                      |               |                                         |               |

**Table 4b. Probability and 95% Confidence Interval of Colorectal Cancer at 10 Years by Baseline Dietary Pattern and Weight Category, NIH-AARP Diet and Health Study for Women, 1996-2006 (n=125,281)**

| Dietary Score        | Mediterranean Diet |               | Healthy Eating Index |               | Dietary Approaches to Stop Hypertension |               |
|----------------------|--------------------|---------------|----------------------|---------------|-----------------------------------------|---------------|
|                      | Probability        | 95% CI        | Probability          | 95% CI        | Probability                             | 95% CI        |
| <b>Normal Weight</b> |                    |               |                      |               |                                         |               |
| Quintile 1           | 0.011              | 0.001 - 0.021 | 0.013                | 0.001 - 0.024 | 0.012                                   | 0.001 - 0.023 |
| Quintile 2           | 0.009              | 0.006 - 0.017 | 0.010                | 0.001 - 0.019 | 0.011                                   | 0.001 - 0.020 |
| Quintile 3           | 0.010              | 0.001 - 0.020 | 0.009                | 0.000 - 0.018 | 0.009                                   | 0.000 - 0.017 |
| Quintile 4           | 0.011              | 0.001 - 0.209 | 0.010                | 0.001 - 0.018 | 0.011                                   | 0.001 - 0.021 |
| Quintile 5           | 0.010              | 0.000 - 0.020 | 0.011                | 0.001 - 0.022 | 0.009                                   | 0.001 - 0.018 |
| p-for-trend          | 0.7829             |               | 0.1574               |               | 0.0585                                  |               |
| <b>Overweight</b>    |                    |               |                      |               |                                         |               |
| Quintile 1           | 0.012              | 0.001 - 0.323 | 0.014                | 0.001 - 0.027 | 0.013                                   | 0.001 - 0.026 |
| Quintile 2           | 0.012              | 0.001 - 0.023 | 0.012                | 0.001 - 0.024 | 0.012                                   | 0.001 - 0.023 |
| Quintile 3           | 0.011              | 0.001 - 0.021 | 0.013                | 0.001 - 0.026 | 0.012                                   | 0.001 - 0.024 |
| Quintile 4           | 0.012              | 0.001 - 0.023 | 0.011                | 0.001 - 0.020 | 0.010                                   | 0.000 - 0.019 |
| Quintile 5           | 0.012              | 0.000 - 0.023 | 0.010                | 0.000 - 0.019 | 0.011                                   | 0.001 - 0.021 |
| p-for-trend          | 0.8314             |               | 0.0015               |               | 0.0343                                  |               |
| <b>Obese</b>         |                    |               |                      |               |                                         |               |
| Quintile 1           | 0.014              | 0.001 - 0.028 | 0.016                | 0.001 - 0.030 | 0.014                                   | 0.001 - 0.028 |
| Quintile 2           | 0.015              | 0.001 - 0.029 | 0.014                | 0.001 - 0.026 | 0.015                                   | 0.001 - 0.030 |
| Quintile 3           | 0.011              | 0.001 - 0.022 | 0.014                | 0.001 - 0.028 | 0.012                                   | 0.001 - 0.024 |
| Quintile 4           | 0.011              | 0.000 - 0.021 | 0.013                | 0.001 - 0.026 | 0.012                                   | 0.000 - 0.023 |
| Quintile 5           | 0.014              | 0.000 - 0.028 | 0.012                | 0.001 - 0.232 | 0.013                                   | 0.001 - 0.025 |
| p-for-trend          | 0.2932             |               | 0.0378               |               | 0.0569                                  |               |

Probabilities are based on a Cox model that adjusts for age, gender, race/ethnicity, smoking, and physical activity and include interaction terms for baseline dietary scores and weight category. Separate models were developed for each dietary pattern. Weight categories were based on BMI (normal: 18.5 to < 25 kg/m<sup>2</sup>; overweight: 25 to < 30 kg/m<sup>2</sup>; obese: ≥30 kg/m<sup>2</sup>).

## DISCUSSION

In this large national study of nearly 400,000 of middle aged and older adults, we found that high quality diets as measured by three diet quality indices (alternate Mediterranean Diet Score, the Healthy Eating Index 2010, and the Dietary Approaches to Stop Hypertension Score) were each associated with lower risk of CRC among normal weight and overweight men. We also found an important gradient effect linking improving dietary quality with lower incident colorectal cancer for men. Associations were inconsistent and of smaller magnitude among obese men and women of all weight categories.

1  
2  
3  
4  
5  
6  
7  
8  
9  
10  
11  
12  
13  
14  
15  
16  
17  
18  
19  
20  
21  
22  
23  
24  
25  
26  
27  
28  
29  
30  
31  
32  
33  
34  
35  
36  
37  
38  
39  
40  
41  
42  
43  
44  
45  
46  
47  
48  
49  
50  
51  
52  
53  
54  
55  
56  
57  
58  
59  
60

Although previous studies have not examined differences according to baseline weight status, our findings are consistent with other studies demonstrating that higher dietary quality is associated with reduced risk of colorectal adenoma in general.<sup>13</sup> For example, a recent narrative review of publications using the Nurses' Health Study (1976-2016) identified red and processed meat, alcohol, smoking and obesity as factors that increase the risk of CRC.<sup>15</sup> Likewise, an ecological study suggested that 76% of the inter-country variation in colorectal cancer incidence was explained by meat, fish, and olive oil intake, with olive oil intake being associated with reduced risk.<sup>2</sup>

A review of epidemiological studies investigating the associations between dietary patterns including the DASH, the Mediterranean Diet, and the Healthy Eating Index has also shown a consistently reduced risk of colorectal adenoma and cancer incidence of higher scores on all of the dietary indexes for men, but was less conclusive for women.<sup>13 35</sup> Another large prospective examination of four established DASH indexes found that greater compliance with the DASH dietary pattern was associated with a reduced risk of CRC for both men and women.<sup>36</sup> This consistency across the three dietary patterns is not surprising because each of these dietary approaches is built on a similar foundation of fresh fruits and vegetables, whole grains, and low saturated fat.

There are physiologic mechanisms through which diet may be associated with a reduced risk of CRC and through which this association may differ for men and for women. For example, studies focused on individual nutrients suggest that olive oil may exert a reduced risk of CRC by influencing secondary bile acid patterns in the colon. This may in turn affect polyamine metabolism in colonic enterocytes, reducing progression from normal mucosa to adenoma and carcinoma.<sup>3</sup> Fiber intake may reduce the contact between carcinogens and the

1  
2  
3 lining of the colon/rectum and increase stool bulk, which dilutes fecal carcinogens and decreases  
4 transit time.<sup>2,7</sup> Red and processed meat may exert a carcinogenic effect due to heme iron, N-nitro  
5 compounds and heterocyclic amines generated during cooking at high temperatures as well as a  
6 pro-neoplastic effect due to increased adiposity and insulin. Other studies suggest that dietary  
7 patterns that include a high consumption of high saturated fatty acid intake may increase CRC  
8 risk via their effects on serum insulin concentrations and on the bioavailability of insulin-like  
9 growth factor-I (IGF-I).<sup>37</sup> Whole grain intake has been associated with decreased fasting insulin  
10 level and improved insulin sensitivity.<sup>7,38</sup>

11  
12 The differential response of dietary intake to risk of CRC incidence by sex in our study  
13 could be explained by differences in the etiology of CRC between men and women.<sup>13</sup> Studies  
14 have indicated that women are more likely to develop proximal CRC compared to men.<sup>39</sup>  
15 Because proximal and distal CRC appear to arise from different pathways it is possible that the  
16 response to dietary intake varies by proximal and distal location type.<sup>39</sup> Hormonal factors may  
17 also be responsible for sex differences CRC etiology. Studies of postmenopausal hormone  
18 therapy and colorectal cancer report a reduction in risk of colon cancer and a decrease in the risk  
19 of rectal cancer for postmenopausal women who had ever taken hormone therapy compared with  
20 women who never used hormones. The CRC risk reduction appears to be stronger for current and  
21 long-term hormone users.<sup>40,41</sup>

22  
23 The association was of borderline significance and inconsistent across the three dietary  
24 measures for obese men and women. It is plausible that the beneficial effects of a healthy diet  
25 are attenuated by the inflammatory, hormonal, and other metabolic changes induced by obesity  
26 that promote colorectal carcinogenesis.<sup>42</sup> For example, the gut microbiome that provides  
27  
28  
29  
30  
31  
32  
33  
34  
35  
36  
37  
38  
39  
40  
41  
42  
43  
44  
45  
46  
47  
48  
49  
50  
51  
52  
53  
54  
55  
56  
57  
58  
59  
60

1  
2  
3 important metabolic capabilities, is responsive to alterations of diet,<sup>43</sup> and has been shown in  
4  
5 obese people to be different from, and less diverse than, those of the non-obese.<sup>44</sup>  
6  
7

8 Our study has some limitations. Our analytic dataset excluded those with family history  
9  
10 of colorectal cancer and are therefore only generalize to those who are of average risk. Medical  
11  
12 co-morbidity was not included as a covariate in the multivariable models. Our study population  
13  
14 was relatively homogenous with upper-to-middle class Americans in urban centers: non-whites  
15  
16 comprised a relatively small proportion of our sample. Dietary intake was self-reported and  
17  
18 assessed using a single baseline Food Frequency Questionnaire, thus, there is potential for non-  
19  
20 differential measurement error.<sup>45</sup> With only a single measure, we could not examine changes in  
21  
22 dietary intake over time. It is possible that the observed differences between men and women are  
23  
24 artifacts from how the data were collected. For example, it has been suggested that differential  
25  
26 bias could be introduced by the way women and men complete the Food Frequency  
27  
28 Questionnaire.<sup>45 46</sup> Women in the AARP (as a group) may have more variation in diet patterns  
29  
30 and perception of dietary intake (and weight status) over time than men.<sup>25</sup> Additionally, there is  
31  
32 evidence that difference in dietary patterns may vary for men and women who respond in a  
33  
34 similar manner to the same survey.<sup>13</sup> Over 90% of the sample was non-Hispanic white. The  
35  
36 research consistently shows that incident rates of CRC and obesity prevalence are higher in  
37  
38 African Americans compared to whites.<sup>47 48</sup> Although our sample was drawn from a nationally  
39  
40 representative sample, it is not representative of adults in that age group because individuals  
41  
42 from low socioeconomic status were not included. This is important because despite steady  
43  
44 improvements in healthy eating patterns among US adults the overall dietary quality remains  
45  
46 poor particularly in low income populations.<sup>49 50</sup>  
47  
48  
49  
50  
51  
52  
53  
54  
55  
56  
57  
58  
59  
60

## CONCLUSION

This longitudinal national study of 398,458 middle aged and older adults found that among normal-weight and overweight men, CRC risk was 25-30% lower with high adherence to each dietary measure. Diet quality was not associated with cancer risk among obese adults. Health benefits of consuming a high-quality diet extend to normal weight men, offering potential insights about approaches to cancer prevention. Additional research is needed to understand the inconsistent results for women.



1  
2  
3 **Acknowledgments:** This research was supported [in part] by the Intramural Research Program  
4 of the NIH, National Cancer Institute. Cancer incidence data from the Atlanta metropolitan area  
5 were collected by the Georgia Center for Cancer Statistics, Department of Epidemiology, Rollins  
6 School of Public Health, Emory University, Atlanta, Georgia. Cancer incidence data from  
7 California were collected by the California Cancer Registry, California Department of Public  
8 Health's Cancer Surveillance and Research Branch, Sacramento, California. Cancer incidence  
9 data from the Detroit metropolitan area were collected by the Michigan Cancer Surveillance  
10 Program, Community Health Administration, Lansing, Michigan. The Florida cancer incidence  
11 data used in this report were collected by the Florida Cancer Data System (Miami, Florida) under  
12 contract with the Florida Department of Health, Tallahassee, Florida. The views expressed herein  
13 are solely those of the authors and do not necessarily reflect those of the FCDC or FDOH.  
14 Cancer incidence data from Louisiana were collected by the Louisiana Tumor Registry,  
15 Louisiana State University Health Sciences Center School of Public Health, New Orleans,  
16 Louisiana. Cancer incidence data from New Jersey were collected by the New Jersey State  
17 Cancer Registry, The Rutgers Cancer Institute of New Jersey, New Brunswick, New Jersey.  
18 Cancer incidence data from North Carolina were collected by the North Carolina Central Cancer  
19 Registry, Raleigh, North Carolina. Cancer incidence data from Pennsylvania were supplied by  
20 the Division of Health Statistics and Research, Pennsylvania Department of Health, Harrisburg,  
21 Pennsylvania. The Pennsylvania Department of Health specifically disclaims responsibility for  
22 any analyses, interpretations or conclusions. Cancer incidence data from Arizona were collected  
23 by the Arizona Cancer Registry, Division of Public Health Services, Arizona Department of  
24 Health Services, Phoenix, Arizona. Cancer incidence data from Texas were collected by the  
25 Texas Cancer Registry, Cancer Epidemiology and Surveillance Branch, Texas Department of  
26 State Health Services, Austin, Texas. Cancer incidence data from Nevada were collected by the  
27 Nevada Central Cancer Registry, Division of Public and Behavioral Health, State of Nevada  
28 Department of Health and Human Services, Carson City, Nevada.

29  
30 We are indebted to the participants in the NIH-AARP Diet and Health Study for their  
31 outstanding cooperation. We also thank Sigurd Hermansen and Kerry Grace Morrissey from  
32 Westat for study outcomes ascertainment and management and Leslie Carroll at Information  
33 Management Services for data support and analysis.

34  
35 The authors want to gratefully acknowledge and thank Drs. Rachel Ballard-Barbash and Jill  
36 Reedy for their invaluable feedback on the manuscript.

37  
38 **Competing Interests:** None declared

39  
40 **Funding Support:** The content of this manuscript was developed with funding from the  
41 National Cancer Institute at the National Institutes of Health (U01-CA1517361, PI: Doubeni).  
42 The contents of this manuscript do not necessarily reflect the views of the funding agencies and  
43 you should not assume endorsement by the Federal Government.

44  
45 Research reported in this publication was supported by the National Institute of Minority Health  
46 and Health Disparities of the National Institutes of Health under Award Number P60MD006912  
47 (PI: Allison). The content is solely the responsibility of the authors and does not necessarily  
48 represent the official views of the National Institutes of Health.

1  
2  
3 Partial support for Dr. Waring provided by NIH grants KL2TR000160 and U01HL105268.  
4  
5

6 Dr. Cutrona was supported by the National Center for Advancing Translational Sciences of the  
7 National Institutes of Health under award number KL2TR000160. The content is solely the  
8 responsibility of the authors and does not necessarily represent the official views of the NIH.  
9  
10  
11  
12  
13  
14  
15  
16  
17  
18  
19  
20  
21  
22  
23  
24  
25  
26  
27  
28  
29  
30  
31  
32  
33  
34  
35  
36  
37  
38  
39  
40  
41  
42  
43  
44  
45  
46  
47  
48  
49  
50  
51  
52  
53  
54  
55  
56  
57  
58  
59  
60

For peer review only

## References

1. Siegel RL, Miller KD, Jemal A. Cancer statistics, 2016. *CA: a cancer journal for clinicians* 2016;66(1):7-30.
2. Huxley RR, Ansary-Moghaddam A, Clifton P, et al. The impact of dietary and lifestyle risk factors on risk of colorectal cancer: a quantitative overview of the epidemiological evidence. *Int J Cancer* 2009;125(1):171-80. doi: 10.1002/ijc.24343 [published Online First: 2009/04/08]
3. Stoneham M, Goldacre M, Seagroatt V, et al. Olive oil, diet and colorectal cancer: an ecological study and a hypothesis. *J Epidemiol Community Health* 2000;54(10):756-60. [published Online First: 2000/09/16]
4. Kontou N, Psaltopoulou T, Soupos N, et al. The mediating effect of Mediterranean diet on the relation between smoking and colorectal cancer: a case-control study. *Eur J Public Health* 2012 doi: cks109 [pii] 10.1093/eurpub/cks109 [published Online First: 2012/08/22]
5. Fuchs CS, Giovannucci EL, Colditz GA, et al. Dietary fiber and the risk of colorectal cancer and adenoma in women. *N Engl J Med* 1999;340(3):169-76. doi: 10.1056/NEJM199901213400301 [published Online First: 1999/01/23]
6. Park Y, Hunter DJ, Spiegelman D, et al. Dietary fiber intake and risk of colorectal cancer: a pooled analysis of prospective cohort studies. *JAMA* 2005;294(22):2849-57. doi: 294/22/2849 [pii] 10.1001/jama.294.22.2849 [published Online First: 2005/12/15]
7. Aune D, Chan DS, Lau R, et al. Dietary fibre, whole grains, and risk of colorectal cancer: systematic review and dose-response meta-analysis of prospective studies. *BMJ* 2011;343:d6617. [published Online First: 2011/11/15]
8. Doubeni CA, Major JM, Laiyemo AO, et al. Contribution of Behavioral Risk Factors and Obesity to Socioeconomic Differences in Colorectal Cancer Incidence. *JNCI Journal of the National Cancer Institute* 2012;104(18):1353-62. doi: 10.1093/jnci/djs346
9. Larsson SC, Wolk A. Obesity and colon and rectal cancer risk: a meta-analysis of prospective studies. *Am J Clin Nutr* 2007;86(3):556-65. doi: 86/3/556 [pii] [published Online First: 2007/09/08]
10. Moghaddam AA, Woodward M, Huxley R. Obesity and risk of colorectal cancer: a meta-analysis of 31 studies with 70,000 events. *Cancer Epidemiol Biomarkers Prev* 2007;16(12):2533-47. doi: 16/12/2533 [pii] 10.1158/1055-9965.EPI-07-0708 [published Online First: 2007/12/19]
11. Howard RA, Freedman DM, Park Y, et al. Physical activity, sedentary behavior, and the risk of colon and rectal cancer in the NIH-AARP Diet and Health Study. *Cancer Causes Control* 2008;19(9):939-53. doi: 10.1007/s10552-008-9159-0 [published Online First: 2008/04/26]
12. Siegel EM, Ulrich CM, Poole EM, et al. The effects of obesity and obesity-related conditions on colorectal cancer prognosis. *Cancer Control* 2010;17(1):52-7. [published Online First: 2009/12/17]
13. Reedy J, Mitrou PN, Krebs-Smith SM, et al. Index-based dietary patterns and risk of colorectal cancer: the NIH-AARP Diet and Health Study. *Am J Epidemiol* 2008;168(1):38-48. doi: kwn097 [pii] 10.1093/aje/kwn097 [published Online First: 2008/06/06]
14. Bamia C, Lagiou P, Buckland G, et al. Mediterranean diet and colorectal cancer risk: results from a European cohort. *Eur J Epidemiol* 2013;28(4):317-28. doi: 10.1007/s10654-013-9795-x
15. Lee DH, Keum N, Giovannucci EL. Colorectal Cancer Epidemiology in the Nurses' Health Study. *American Journal of Public Health* 2016;106(9):1599-607. doi: 10.2105/AJPH.2016.303320

16. Pignone M, Rich M, Teutsch SM, et al. Screening for colorectal cancer in adults at average risk: a summary of the evidence for the U.S. Preventive Services Task Force. *Ann Intern Med* 2002;137(2):132-41.
17. Lebowitz B, Capiak K, Neugut AI, et al. Risk of colorectal adenomas and advanced neoplasia in Hispanic, black and white patients undergoing screening colonoscopy. *Aliment Pharmacol Ther* 2012;35(12):1467-73. doi: 10.1111/j.1365-2036.2012.05119.x
18. Platz EA, Willett WC, Colditz GA, et al. Proportion of colon cancer risk that might be preventable in a cohort of middle-aged US men. *Cancer Causes Control* 2000;11(7):579-88.
19. Ogden CL, Carroll MD, Kit BK, et al. Prevalence of childhood and adult obesity in the United States, 2011-2012. *JAMA* 2014;311(8):806-14. doi: 10.1001/jama.2014.732
20. Amine E, Baba N, Belhadj M, et al. Diet, nutrition and the prevention of chronic diseases: report of a Joint WHO/FAO Expert Consultation: World Health Organization 2002.
21. Sacks FM, Obarzanek E, Windhauser MM, et al. Rationale and design of the Dietary Approaches to Stop Hypertension trial (DASH): a multicenter controlled-feeding study of dietary patterns to lower blood pressure. *Annals of epidemiology* 1995;5(2):108-18.
22. Karanja NM, Obarzanek E, Lin P-H, et al. Descriptive characteristics of the dietary patterns used in the Dietary Approaches to Stop Hypertension trial. *Journal of the American Dietetic Association* 1999;99(8):S19-S27.
23. Knuops KB, de Groot LM, Kromhout D, et al. Mediterranean diet, lifestyle factors, and 10-year mortality in elderly European men and women: The Hale project. *JAMA* 2004;292(12):1433-39. doi: 10.1001/jama.292.12.1433
24. Jensen MD, Ryan DH, Apovian CM, et al. 2013 AHA/ACC/TOS Guideline for the Management of Overweight and Obesity in Adults: A Report of the American College of Cardiology/American Heart Association Task Force on Practice Guidelines and The Obesity Society. *Journal of the American College of Cardiology* 2014;63(25\_PA) doi: 10.1016/j.jacc.2013.11.004
25. Schatzkin A, Subar AF, Thompson FE, et al. Design and serendipity in establishing a large cohort with wide dietary intake distributions: the National Institutes of Health-American Association of Retired Persons Diet and Health Study. *Am J Epidemiol* 2001;154(12):1119-25.
26. Thompson FE, Subar AF, Brown CC, et al. Cognitive research enhances accuracy of food frequency questionnaire reports: results of an experimental validation study. *Journal of the American Dietetic Association* 2002;102(2):212-25.
27. Thompson FE, Kipnis V, Midthune D, et al. Performance of a food-frequency questionnaire in the US NIH-AARP (National Institutes of Health-American Association of Retired Persons) Diet and Health Study. *Public Health Nutr* 2008;11(2):183-95. doi: 10.1017/S1368980007000419
28. Guenther PM, Kirkpatrick SI, Reedy J, et al. The Healthy Eating Index-2010 is a valid and reliable measure of diet quality according to the 2010 Dietary Guidelines for Americans. *J Nutr* 2014;144(3):399-407. doi: 10.3945/jn.113.183079
29. Fung TT, Hu FB, McCullough ML, et al. Diet Quality Is Associated with the Risk of Estrogen Receptor-Negative Breast Cancer in Postmenopausal Women. *The Journal of Nutrition* 2006;136(2):466-72.
30. Reedy J, Krebs-Smith SM, Miller PE, et al. Higher diet quality is associated with decreased risk of all-cause, cardiovascular disease, and cancer mortality among older adults. *J Nutr* 2014;144(6):881-9. doi: 10.3945/jn.113.189407
31. Mitrou PN, Kipnis V, Thiebaut AC, et al. Mediterranean dietary pattern and prediction of all-cause mortality in a US population: results from the NIH-AARP Diet and Health Study. *Arch Intern Med* 2007;167(22):2461-8. doi: 10.1001/archinte.167.22.2461 [pii] 10.1001/archinte.167.22.2461 [published Online First: 2007/12/12]

- 1  
2  
3  
4  
5  
6  
7  
8  
9  
10  
11  
12  
13  
14  
15  
16  
17  
18  
19  
20  
21  
22  
23  
24  
25  
26  
27  
28  
29  
30  
31  
32  
33  
34  
35  
36  
37  
38  
39  
40  
41  
42  
43  
44  
45  
46  
47  
48  
49  
50  
51  
52  
53  
54  
55  
56  
57  
58  
59  
60
32. Appel LJ, Moore TJ, Obarzanek E, et al. A clinical trial of the effects of dietary patterns on blood pressure. *New England Journal of Medicine* 1997;336(16):1117-24.
  33. Xu J, Long S. Confidence intervals for predicted outcomes in regression models for categorical outcomes. *The Stata Journal* 2005;5(4):537-59.
  34. Cleves M, Gould W, Gutierrez RG, et al. An Introduction to Survival Analysis Using Stata, Third Edition College Station, TX: Stata Press 2010.
  35. Miller PE, Lesko SM, Muscat JE, et al. Dietary patterns and colorectal adenoma and cancer risk: a review of the epidemiological evidence. *Nutr Cancer* 2010;62(4):413-24. doi: 10.1080/01635580903407114
  36. Miller PE, Cross AJ, Subar AF, et al. Comparison of 4 established DASH diet indexes: examining associations of index scores and colorectal cancer. *Am J Clin Nutr* 2013;98(3):794-803. doi: 10.3945/ajcn.113.063602
  37. Sandhu MS, Dunger DB, Giovannucci EL. Insulin, Insulin-Like Growth Factor-I (IGF-I), IGF Binding Proteins, Their Biologic Interactions, and Colorectal Cancer. *Journal of the National Cancer Institute* 2002;94(13):972-80.
  38. Pereira MA, Jacobs Jr DR, Van Horn L, et al. Dairy consumption, obesity, and the insulin resistance syndrome in young adults: the CARDIA Study. *Jama* 2002;287(16):2081-89.
  39. Jacobs ET, Thompson PA, Martinez ME. Diet, gender, and colorectal neoplasia. *Journal of clinical gastroenterology* 2007;41(8):731-46. doi: 10.1097/MCG.0b013e3180338e56
  40. Grodstein F, Newcomb PA, Stampfer MJ. Postmenopausal hormone therapy and the risk of colorectal cancer: a review and meta-analysis. *Am J Med* 1999;106(5):574-82.
  41. Morch LS, Lidegaard O, Keiding N, et al. The influence of hormone therapies on colon and rectal cancer. *Eur J Epidemiol* 2016;31(5):481-9. doi: 10.1007/s10654-016-0116-z
  42. Dai Z, Xu Y-C, Niu L. Obesity and colorectal cancer risk: a meta-analysis of cohort studies. *World Journal of Gastroenterology* 2007;13(31):4199.
  43. David LA, Maurice CF, Carmody RN, et al. Diet rapidly and reproducibly alters the human gut microbiome. *Nature* 2014;505(7484):559-63. doi: 10.1038/nature12820 <http://www.nature.com/nature/journal/v505/n7484/abs/nature12820.html#supplementary-information>
  44. Turnbaugh PJ, Hamady M, Yatsunencko T, et al. A core gut microbiome in obese and lean twins. *Nature* 2009;457(7228):480-84. doi: [http://www.nature.com/nature/journal/v457/n7228/suppinfo/nature07540\\_S1.html](http://www.nature.com/nature/journal/v457/n7228/suppinfo/nature07540_S1.html)
  45. Subar AF, Kipnis V, Troiano RP, et al. Using intake biomarkers to evaluate the extent of dietary misreporting in a large sample of adults: the OPEN study. *Am J Epidemiol* 2003;158(1):1-13.
  46. Kipnis V, Subar AF, Midthune D, et al. Structure of dietary measurement error: results of the OPEN biomarker study. *American Journal of Epidemiology* 2003;158(1):14-21.
  47. Ward E, Jemal A, Cokkinides V, et al. Cancer disparities by race/ethnicity and socioeconomic status. *CA Cancer J Clin* 2004;54(2):78-93.
  48. Irby K, Anderson WF, Henson DE, et al. Emerging and widening colorectal carcinoma disparities between Blacks and Whites in the United States (1975-2002). *Cancer Epidemiol Biomarkers Prev* 2006;15(4):792-7. doi: 10.1158/1055-9965.EPI-05-0879
  49. Wang DD, Leung CW, Li Y, et al. Trends in dietary quality among adults in the United States, 1999 through 2010. *JAMA Internal Medicine* 2014;174(10):1587-95. doi: 10.1001/jamainternmed.2014.3422
  50. Krebs-Smith SM, Guenther PM, Subar AF, et al. Americans Do Not Meet Federal Dietary Recommendations. *The Journal of Nutrition* 2010;140(10):1832-38. doi: 10.3945/jn.110.124826

## STROBE Statement—checklist of items that should be included in reports of observational studies

|                              | Item No | Recommendation                                                                                                                                                                                                                                                                                                                                                                                                                                                                                                                                                                                                                                                                                                                    |
|------------------------------|---------|-----------------------------------------------------------------------------------------------------------------------------------------------------------------------------------------------------------------------------------------------------------------------------------------------------------------------------------------------------------------------------------------------------------------------------------------------------------------------------------------------------------------------------------------------------------------------------------------------------------------------------------------------------------------------------------------------------------------------------------|
| <b>Title and abstract</b>    | 1       | (a) Indicate the study's design with a commonly used term in the title or the abstract <u><a href="#">see pg. 1</a></u><br>(b) Provide in the abstract an informative and balanced summary of what was done and what was found <u><a href="#">see pg. 2</a></u>                                                                                                                                                                                                                                                                                                                                                                                                                                                                   |
| <b>Introduction</b>          |         |                                                                                                                                                                                                                                                                                                                                                                                                                                                                                                                                                                                                                                                                                                                                   |
| Background/rationale         | 2       | Explain the scientific background and rationale for the investigation being reported <u><a href="#">see pgs. 4-5</a></u>                                                                                                                                                                                                                                                                                                                                                                                                                                                                                                                                                                                                          |
| Objectives                   | 3       | State specific objectives, including any prespecified hypotheses <u><a href="#">see pgs. 4-5</a></u>                                                                                                                                                                                                                                                                                                                                                                                                                                                                                                                                                                                                                              |
| <b>Methods</b>               |         |                                                                                                                                                                                                                                                                                                                                                                                                                                                                                                                                                                                                                                                                                                                                   |
| Study design                 | 4       | Present key elements of study design early in the paper <u><a href="#">see pg. 5</a></u>                                                                                                                                                                                                                                                                                                                                                                                                                                                                                                                                                                                                                                          |
| Setting                      | 5       | Describe the setting, locations, and relevant dates, including periods of recruitment, exposure, follow-up, and data collection                                                                                                                                                                                                                                                                                                                                                                                                                                                                                                                                                                                                   |
| Participants                 | 6       | (a) <i>Cohort study</i> —Give the eligibility criteria, and the sources and methods of selection of participants. Describe methods of follow-up<br><i>Case-control study</i> —Give the eligibility criteria, and the sources and methods of case ascertainment and control selection. Give the rationale for the choice of cases and controls<br><i>Cross-sectional study</i> —Give the eligibility criteria, and the sources and methods of selection of participants <u><a href="#">see pg. 5</a></u><br>(b) <i>Cohort study</i> —For matched studies, give matching criteria and number of exposed and unexposed<br><i>Case-control study</i> —For matched studies, give matching criteria and the number of controls per case |
| Variables                    | 7       | Clearly define all outcomes, exposures, predictors, potential confounders, and effect modifiers. Give diagnostic criteria, if applicable <u><a href="#">see pgs. 6-8</a></u>                                                                                                                                                                                                                                                                                                                                                                                                                                                                                                                                                      |
| Data sources/<br>measurement | 8*      | For each variable of interest, give sources of data and details of methods of assessment (measurement). Describe comparability of assessment methods if there is more than one group                                                                                                                                                                                                                                                                                                                                                                                                                                                                                                                                              |
| Bias                         | 9       | Describe any efforts to address potential sources of bias                                                                                                                                                                                                                                                                                                                                                                                                                                                                                                                                                                                                                                                                         |
| Study size                   | 10      | Explain how the study size was arrived at                                                                                                                                                                                                                                                                                                                                                                                                                                                                                                                                                                                                                                                                                         |
| Quantitative variables       | 11      | Explain how quantitative variables were handled in the analyses. If applicable, describe which groupings were chosen and why                                                                                                                                                                                                                                                                                                                                                                                                                                                                                                                                                                                                      |
| Statistical methods          | 12      | (a) Describe all statistical methods, including those used to control for confounding<br>(b) Describe any methods used to examine subgroups and interactions<br>(c) Explain how missing data were addressed<br>(d) <i>Cohort study</i> —If applicable, explain how loss to follow-up was addressed<br><i>Case-control study</i> —If applicable, explain how matching of cases and controls was addressed<br><i>Cross-sectional study</i> —If applicable, describe analytical methods taking account of sampling strategy <u><a href="#">see pgs. 8-9</a></u><br>(e) Describe any sensitivity analyses                                                                                                                             |

Continued on next page

**Results**

|                  |     |                                                                                                                                                                                                                                                                                                                                                                                                                                     |
|------------------|-----|-------------------------------------------------------------------------------------------------------------------------------------------------------------------------------------------------------------------------------------------------------------------------------------------------------------------------------------------------------------------------------------------------------------------------------------|
| Participants     | 13* | (a) Report numbers of individuals at each stage of study—eg numbers potentially eligible, examined for eligibility, confirmed eligible, included in the study, completing follow-up, and analysed <u>see pg. 8</u><br>(b) Give reasons for non-participation at each stage<br>(c) Consider use of a flow diagram                                                                                                                    |
| Descriptive data | 14* | (a) Give characteristics of study participants (eg demographic, clinical, social) and information on exposures and potential confounders <u>see pgs. 9-11</u><br>(b) Indicate number of participants with missing data for each variable of interest <u>see pg. 8</u><br>(c) <i>Cohort study</i> —Summarise follow-up time (eg, average and total amount)                                                                           |
| Outcome data     | 15* | <i>Cohort study</i> —Report numbers of outcome events or summary measures over time<br><i>Case-control study</i> —Report numbers in each exposure category, or summary measures of exposure<br><i>Cross-sectional study</i> —Report numbers of outcome events or summary measures <u>see pg. 6</u>                                                                                                                                  |
| Main results     | 16  | (a) Give unadjusted estimates and, if applicable, confounder-adjusted estimates and their precision (eg, 95% confidence interval). Make clear which confounders were adjusted for and why they were included <u>see pgs. 11-15</u><br>(b) Report category boundaries when continuous variables were categorized<br>(c) If relevant, consider translating estimates of relative risk into absolute risk for a meaningful time period |
| Other analyses   | 17  | Report other analyses done—eg analyses of subgroups and interactions, and sensitivity analyses                                                                                                                                                                                                                                                                                                                                      |

**Discussion**

|                  |    |                                                                                                                                                                                                  |
|------------------|----|--------------------------------------------------------------------------------------------------------------------------------------------------------------------------------------------------|
| Key results      | 18 | Summarise key results with reference to study objectives <u>see pgs. 16-19</u>                                                                                                                   |
| Limitations      | 19 | Discuss limitations of the study, taking into account sources of potential bias or imprecision. Discuss both direction and magnitude of any potential bias <u>see pg. 18</u>                     |
| Interpretation   | 20 | Give a cautious overall interpretation of results considering objectives, limitations, multiplicity of analyses, results from similar studies, and other relevant evidence <u>see pgs. 16-18</u> |
| Generalisability | 21 | Discuss the generalisability (external validity) of the study results <u>see pgs. 16-18</u>                                                                                                      |

**Other information**

|         |    |                                                                                                                                                                                     |
|---------|----|-------------------------------------------------------------------------------------------------------------------------------------------------------------------------------------|
| Funding | 22 | Give the source of funding and the role of the funders for the present study and, if applicable, for the original study on which the present article is based <u>see pgs. 19-20</u> |
|---------|----|-------------------------------------------------------------------------------------------------------------------------------------------------------------------------------------|

\*Give information separately for cases and controls in case-control studies and, if applicable, for exposed and unexposed groups in cohort and cross-sectional studies.

**Note:** An Explanation and Elaboration article discusses each checklist item and gives methodological background and published examples of transparent reporting. The STROBE checklist is best used in conjunction with this article (freely available on the Web sites of PLoS Medicine at <http://www.plosmedicine.org/>, Annals of Internal Medicine at <http://www.annals.org/>, and Epidemiology at <http://www.epidem.com/>). Information on the STROBE Initiative is available at [www.strobe-statement.org](http://www.strobe-statement.org).

# BMJ Open

## The Association of Dietary Quality with Colorectal Cancer among Normal Weight, Overweight, and Obese Men and Women: A Prospective Longitudinal Study

|                                 |                                                                                                                                                                                                                                                                                                                                                                                                                                                                                                                                                                                                                                                                                    |
|---------------------------------|------------------------------------------------------------------------------------------------------------------------------------------------------------------------------------------------------------------------------------------------------------------------------------------------------------------------------------------------------------------------------------------------------------------------------------------------------------------------------------------------------------------------------------------------------------------------------------------------------------------------------------------------------------------------------------|
| Journal:                        | <i>BMJ Open</i>                                                                                                                                                                                                                                                                                                                                                                                                                                                                                                                                                                                                                                                                    |
| Manuscript ID                   | bmjopen-2016-015619.R2                                                                                                                                                                                                                                                                                                                                                                                                                                                                                                                                                                                                                                                             |
| Article Type:                   | Research                                                                                                                                                                                                                                                                                                                                                                                                                                                                                                                                                                                                                                                                           |
| Date Submitted by the Author:   | 19-Apr-2017                                                                                                                                                                                                                                                                                                                                                                                                                                                                                                                                                                                                                                                                        |
| Complete List of Authors:       | Torres Stone, Rosalie; Clark University, Sociology; University of Massachusetts Medical School, Psychiatry<br>Waring, Molly; University of Massachusetts Medical School, Department of Quantitative Health Sciences<br>Cutrona, Sarah; University of Massachusetts Medical School, Department of Medicine<br>Kiefe, Catarina; UMass Medical School, Quantitative Health Sciences<br>Allison, Jeroan; University of Massachusetts Worcester, Department of Quantitative Health Sciences<br>Doubeni, Chyke A; University of Pennsylvania Perelman School of Medicine, Department of Family Medicine and Community Health, and the Center for Clinical Epidemiology and Biostatistics |
| <b>Primary Subject Heading</b>: | Oncology                                                                                                                                                                                                                                                                                                                                                                                                                                                                                                                                                                                                                                                                           |
| Secondary Subject Heading:      | Gastroenterology and hepatology, Epidemiology, Oncology, Public health                                                                                                                                                                                                                                                                                                                                                                                                                                                                                                                                                                                                             |
| Keywords:                       | EPIDEMIOLOGY, Gastroenterology < INTERNAL MEDICINE, NUTRITION & DIETETICS                                                                                                                                                                                                                                                                                                                                                                                                                                                                                                                                                                                                          |
|                                 |                                                                                                                                                                                                                                                                                                                                                                                                                                                                                                                                                                                                                                                                                    |

SCHOLARONE™  
Manuscripts



1  
2  
3  
4  
5  
6  
7  
8  
9 **Title: The Association of Dietary Quality with Colorectal Cancer among Normal Weight,**  
10 **Overweight, and Obese Men and Women: A Prospective Longitudinal Study**  
11  
12

13  
14  
15 Rosalie A. Torres Stone,<sup>1,2</sup> Molly E. Waring,<sup>3</sup> Sarah L. Cutrona,<sup>4</sup>  
16 Catarina I. Kiefe,<sup>3</sup> Jeroan Allison,<sup>3</sup> Chyke A. Doubeni<sup>5</sup>  
17  
18

19 <sup>1</sup>Clark University, Sociology Department, Worcester, Ma 01655 USA; <sup>2</sup>Systems and  
20 Psychosocial Advances Research Center (SPARC), Department of Psychiatry, University of  
21 Massachusetts Medical School, 222 Maple Avenue, Shrewsbury, MA 01545 USA, <sup>3</sup>Department  
22 of Quantitative Health Sciences, University of Massachusetts Medical School, Worcester, MA  
23 01605 USA; <sup>4</sup>Department of Medicine, University of Massachusetts Medical School, Worcester,  
24 MA 01605 USA <sup>5</sup>Department of Family Medicine and Community Health, and the Center for  
25 Clinical Epidemiology and Biostatistics, Perelman School of Medicine, University of  
26 Pennsylvania, Philadelphia, PA USA 19104  
27  
28  
29  
30

31  
32 **Author Note**  
33

34 Correspondence concerning this article should be addressed to Rosalie A. Torres Stone, 950  
35 Main Street, Clark University, Sociology Department, Worcester MA 01655, USA. E-mail:  
36 [rtorresstone@clarku.edu](mailto:rtorresstone@clarku.edu); Phone: 508-793-7376; Fax: 508-793-8854  
37  
38

39  
40 **Key Words:** colorectal cancer, diet, food, and nutrition, body mass index  
41  
42

43 **Manuscript Word Count: 3,302**  
44  
45  
46  
47  
48  
49  
50  
51  
52  
53  
54  
55  
56  
57  
58  
59  
60

**ABSTRACT**

**Objective:** Lower body mass index (BMI) and higher dietary quality reduce the risk of colorectal cancer (CRC). A full understanding of how these associations vary by sex and weight is lacking.

**Methods:** We used data from the NIH-AARP Diet and Health Study for 398,458 persons who were 50-71 years old in 1995-1996 and followed through 2006. Exposures were dietary quality as reflected by the Mediterranean Diet, the Healthy Eating Index-2010, and the Dietary Approaches to Stop Hypertension score, stratified by BMI category. The outcome was CRC diagnosis from cancer registry data. Cox Regression models adjusted for disease risk factors.

**Results:** Over a mean duration of 123 months of follow-up, there were 6,515 new diagnoses of colorectal cancer (1,953 among the normal weight, 2,924 among the overweight, and 1,638 among the obese; 4,483 among men and 2,032 among women). For normal weight and overweight men, we found a strong dose-response pattern for the association of increasing quintile of dietary quality with decreasing risk of CRC; this pattern was observed for obese men as well, but less consistently across the three measures of dietary quality. The findings were of smaller magnitude and less consistent for women, but still suggesting associations of similar direction.

**Conclusion:** We observed that increased dietary quality was associated with lower risk of incident CRC up to 10 years later for men regardless of baseline weight category.

**Public Health Implications:** The findings accentuate the need to establish strategies to improve diet quality and prevent obesity as a cancer prevention strategy.

**Word Count: 252**

**Key Words:** colorectal cancer, diet, food, and nutrition, body mass index

## Article Summary

### Strengths and Limitations

- To our knowledge, this is the first study to examine the potential benefits of healthy eating patterns in reducing colorectal cancer risk among men and women who are at normal weight, overweight and obese adults.
- In this longitudinal national study of 398,458 adults, we found that the incidence of colorectal cancer decreased in a generally consistent dose-response manner with increasing adherence to three dietary measures (Mediterranean Diet, Healthy Eating Index-2010, and Dietary Approaches to Stop Hypertension) for men who were of normal weight or overweight. Similar findings were of smaller magnitude and more inconsistent among men who were obese and among women of all weight categories.
- Dietary intake was self-reported and assessed using a single baseline Food Frequency Questionnaire, thus, there is potential for non-differential measurement error. With only a single measure, we could not examine changes in dietary intake over time. Over 90% of the sample was non-Hispanic white. Research is needed to examine whether associations are similar in other racial/ethnic groups and to better understand the inconsistency in the results for women.

### Contributors

All authors read and approved the final version of the manuscript. Rosalie A. Torres Stone drafted the original manuscript and interpreted the findings, Chyke A. Doubeni conceived of the study and participated in the analyses and interpretation of the data. Jeroan Allison and Molly E. Waring conducted the analyses and interpreted the data. Sarah L. Cutrona and Catarina I. Kiefe contributed to the interpretation of the findings and critically revised the manuscript.

### Extra data is available:

Extra data is available by submitting a proposal for each project/manuscript for review by the NIH AARP Steering Committee prior to accessing NIH AARP data and to developing an associated manuscript. A proposal must be submitted through the public website, NIH-AARP Diet & Health Study Tracking and Review System (STaRS, <https://www.nihaarpstars.com>).

### Conflict of Interest:

None declared

### Data sharing:

No additional data is available.

### Ethical approval:

Not required. The data is de-identified.

1  
2  
3 **Word Count: 3,209**  
4

5  
6 **INTRODUCTION**  
7

8 Colorectal cancer (CRC) is the third leading cause of cancer-related deaths in the United  
9 States, resulting in an estimated more than 49,000 deaths in 2016.<sup>1</sup> Modifiable risk factors such  
10 as excess body weight and unhealthy behaviors (sedentary lifestyles, unhealthy dietary patterns,  
11 and smoking) increase the risk of CRC.<sup>2-15</sup> Most colorectal cancers are preventable through  
12 screening, detection and removal of precancerous lesions, or by engaging in healthful  
13 behaviors.<sup>16 17</sup> More specifically, it has been estimated that up to 70% of colorectal cancers  
14 could be avoided by risk factor modification.<sup>18</sup>  
15  
16  
17  
18  
19  
20  
21  
22  
23

24 Obesity is a particularly concerning risk factor, as 37% of U.S. adults are obese.<sup>19</sup> A  
25 recent meta-analysis found a 30% higher risk of colon cancer in men and a 12% higher risk in  
26 women for every 5-kg/m<sup>2</sup> increase in body mass index (BMI).<sup>9</sup> Another meta-analysis found  
27 that obese adults were at roughly 20% greater risk of developing CRC compared with those of  
28 normal weight, and the risk of CRC increased 7% for every 2-kg/m<sup>2</sup> higher BMI.<sup>10</sup>  
29  
30  
31  
32  
33  
34  
35

36 Like obesity, diet is estimated to be one of the most important modifiable risk factors for  
37 CRC.<sup>13-15</sup> A dietary pattern that is rich in whole grains, vegetables, fruit, fish, legumes, and nuts  
38 and low in red and processed meat and alcohol has been linked to a substantial reduction in the  
39 risk of CRC.<sup>2-7 13 14</sup> Therefore, the World Health Organization recommends improving dietary  
40 quality by increasing consumption of fruit and vegetables, as well as legumes, whole grains, and  
41 nuts.<sup>20</sup> These recommendations are similar to those studied in the Dietary Approaches to Stop  
42 Hypertension trial,<sup>21 22</sup> and are also similar to recommendations found in the Mediterranean Diet  
43 examined in the Seven Countries Study.<sup>13 23</sup>  
44  
45  
46  
47  
48  
49  
50  
51  
52  
53  
54  
55  
56  
57  
58  
59  
60

1  
2  
3  
4  
5  
6  
7  
8  
9  
10  
11  
12  
13  
14  
15  
16  
17  
18  
19  
20  
21  
22  
23  
24  
25  
26  
27  
28  
29  
30  
31  
32  
33  
34  
35  
36  
37  
38  
39  
40  
41  
42  
43  
44  
45  
46  
47  
48  
49  
50  
51  
52  
53  
54  
55  
56  
57  
58  
59  
60

Despite the potential benefits of a healthy BMI, many overweight and obese adults are not motivated or able to lose weight,<sup>24</sup> raising important questions. In the absence of weight loss, can a healthy diet still reduce CRC risk among overweight or obese adults? Likewise, because diet is emphasized as a means for weight loss, those who may be of normal weight may also lack the motivation to engage in health eating. These considerations raise unanswered questions about how the association of health eating patterns varies by weight categories. Therefore, our study examined the association between dietary quality and the risk of CRC and studied the variation in this association among normal weight, overweight, and obese adults. Because dietary patterns have been observed to be different for men and women analyses were stratified by gender.<sup>13</sup>

## METHODS

We used data from the National Institutes of Health-AARP (formerly the American Association of Retired Persons) Diet and Health Study. The NIH-AARP cohort was established in 1995-1996. AARP members who were contacted, returned questionnaires eliciting information on demographic and anthropometric characteristics, dietary intake, and health-related behaviors. The initial response rate was 18%. Eligible participants were 50 to 71 years old and resided in six U.S. states (California, Florida, Louisiana, New Jersey, North Carolina, and Pennsylvania) and two metropolitan areas (Atlanta, Georgia, and Detroit, Michigan).

## Outcome

The outcome for this analysis was diagnosis with incident adenocarcinoma of the colon/rectum ascertained from tumor registries through December 31, 2006. Cancer diagnosis in

1  
2  
3 participants was determined through probabilistic linkage with 8 state cancer registries. A  
4  
5 validation study found that this approach captured approximately 90% of all cancers.<sup>25</sup> Cancer  
6  
7 type and histologic characteristics were obtained from tumor registry data using International  
8  
9 Classification of Diseases – Oncology codes [8000, 8010, 8020, 8140-43, 8210-8211, 8221,  
10  
11 8255, 8261-3, 8480-1, 8490, 8510, and 8574].  
12  
13

## 14 15 16 17 18 **Determinants**

19  
20 The main determinants for this analysis were three indices of dietary quality. At baseline  
21  
22 in 1995-1996, dietary intake during the past 12 months were assessed using a 124-item Food  
23  
24 Frequency Questionnaire. The NIH-AARP Food Frequency Questionnaire was previously  
25  
26 validated against 24-hour dietary recall in this cohort.<sup>25</sup> The Diet History Questionnaire has been  
27  
28 calibrated,<sup>25 26</sup> and further validation was performed by using two 24-h recalls within a subset of  
29  
30 the NIH-AARP Diet and Health Study.<sup>27</sup> By using the guidance-based food group equivalents  
31  
32 and other nutrient variables, we calculated component and index scores for the Healthy Eating  
33  
34 Index-2010 (HEI-2010),<sup>28</sup> the Mediterranean Diet Score,<sup>29</sup> and the Dietary Approaches to Stop  
35  
36 Hypertension (DASH),<sup>29</sup> according to algorithms described by Reedy et. al.<sup>30</sup>  
37  
38  
39  
40

41 The Mediterranean Diet Score ranges from 0 to 9 with higher scores corresponding to  
42  
43 diets more consistent with a Mediterranean diet.<sup>13 29 31</sup> One point each is given for: intake at or  
44  
45 greater than the sex-specific median for vegetables, fruit, nuts, legumes, fish, and whole grains;  
46  
47 and intake less than the sex-specific median for the monounsaturated: saturated fat ratio and red  
48  
49 and processed meat. Alcohol intake was scored by predetermined cut points for moderate intake  
50  
51 (men: 10-25 grams per day, women: 5-15 grams per day);<sup>13</sup> participants with moderate alcohol  
52  
53 intake received 1 point; other intakes (none, occasional, excessive) received 0 points.  
54  
55  
56  
57  
58  
59  
60

1  
2  
3 The Healthy Eating Index 2010 was developed for measuring dietary quality based on  
4 federal guidelines.<sup>28</sup> It awards points based on the adequacy of intake in nine categories (total  
5 vegetables, greens and beans, total fruit, whole fruit, whole grains, dairy, total protein foods, and  
6 seafood and plant proteins, fatty acids) and moderation of intake in three categories (sodium,  
7 refined grains, and empty calories). The Healthy Eating Index 2010 ranges from 0 to 100 with  
8 higher scores indicating better dietary quality.  
9

10  
11 DASH scores capture the diet tested in two DASH randomized controlled feeding trials,<sup>21</sup>  
12  
13  
14  
15  
16  
17  
18  
19  
20  
21  
22  
23  
24  
25  
26  
27  
28  
29  
30  
31  
32  
33  
34  
35  
36  
37  
38  
39  
40  
41  
42  
43  
44  
45  
46  
47  
48  
49  
50  
51  
52  
53  
54  
55  
56  
57  
58  
59  
60  
DASH scores capture the diet tested in two DASH randomized controlled feeding trials,<sup>21</sup>  
which examined the role of dietary patterns on blood pressure. Several versions of the DASH  
score exist, and we used the one most commonly found in the literature with U.S. populations.<sup>29</sup>  
To derive the score for the DASH Diet, intake was classified into quintiles for the following  
categories: fruits, vegetables, nuts and legumes, whole grains, low-fat dairy (higher intake  
indicated by higher quintile) and sodium, red and processed meats, and sweetened beverages  
(higher intake indicated by lower quintiles).<sup>30</sup> Based on these eight categories, the DASH Score  
ranged from 8 to 40, with higher scores indicating better dietary quality. DASH score were  
energy adjusted.

BMI was calculated from height and weight self-reported at baseline and categorized  
based on WHO criteria (normal: 18.5 to < 25 kg/m<sup>2</sup>, overweight: 25 to < 30 kg/m<sup>2</sup>, and obese: ≥  
30 kg/m<sup>2</sup>).

### Covariates

Characteristics self-reported at baseline included gender, age (50-54 years, 55-59 years,  
60-64 years, 65-69 years, ≥ 70 years), educational level (high school or less, some college, or  
college degree), and race/ethnicity (Non-Hispanic White, Non-Hispanic Black, Hispanic,

1  
2  
3 Asian/Pacific Islander, American Indian/Alaskan Native). Other risk factors for CRC included:  
4  
5 smoking status (never smoked, former smoker, current smoker) and physical activity.  
6  
7

8 Participants were asked how often (in the previous 12 months) they engaged in physical activity  
9  
10 that lasted  $\geq 20$  minutes and caused increases in breathing or heart rate, or made the participant  
11  
12 sweat (never, rarely, 1-3 times per month, 1-2 times per week, 3-4 times per week,  $\geq 5$  more  
13  
14 times per week).  
15  
16

### 17 18 19 **Construction of the analytic sample**

20  
21 Of the 566,398 adults enrolled in the Diet-AARP Health Study, we excluded those who:  
22  
23 (1) completed questionnaires by proxy (n=15,760); (2) reported a history of end-stage renal  
24  
25 disease (1,299); (3) reported a history of cancer (8,902) or had registry confirmed prevalent  
26  
27 cancer (50,591); (4) reported a history of colonic or rectal polyps (57,179); (5) reported any first-  
28  
29 degree relatives with colon cancer (50,552); (6) were underweight (BMI  $< 18.5$  kg/m<sup>2</sup>) (5,912);  
30  
31 (7) were missing height or weight (13,944); or (8) reported implausibly high or low energy  
32  
33 intake based on Box-Cox transformation procedures designed for this dataset (n=3,534),<sup>27</sup>  
34  
35 resulting in an analytic sample of 398,458 adults.  
36  
37  
38  
39  
40  
41  
42

### 43 **Statistical Analysis**

44  
45 Univariate and summary characteristics were examined for all variables. Chi-square tests  
46  
47 were used to compare characteristics of participants who did and did not develop CRC over the  
48  
49 follow-up period for categorical variables, and the ANOVA was used for continuous variables.  
50  
51 Bivariate analyses also examined the association of each composite dietary measure and several  
52  
53 sets of food groups with the incidence of colorectal cancer. Linear regression models  
54  
55 characterized the association of participant characteristics with dietary adherence, treating the  
56  
57  
58  
59  
60



1  
2  
3 dietary measures as continuous. Based on known risk factors for CRC, covariates in all models  
4 included age, gender, race/ethnicity, education, smoking status, physical activity, and weight  
5 category. All models were also adjusted for energy intake.  
6  
7  
8  
9

10 Cox regression with duration of observation as the underlying time metric was used to  
11 calculate the hazard of developing CRC for a series of multivariable models. All models entered  
12 the dietary measures as quintiles and included adjustment for age, race/ethnicity, education,  
13 smoking, physical activity, and energy intake. The first set of models were based on stratified  
14 subsamples, being estimated separately for each gender-weight category and each dietary  
15 measure. A second set of Cox regression models was also created across all weight categories  
16 that included interaction terms for weight category and dietary adherence. From this second set  
17 of models, we predicted the probability of incident CRC at 10 years for each level of dietary  
18 quality and weight by raising the baseline hazard at 10 years to the power of the exponentiated  
19 linear predictor. Confidence intervals for the predicted probabilities were constructed with the  
20 delta method for approximation of complex variance estimates using Taylor linearization.<sup>33</sup>  
21  
22 Statistical “trend” tests were performed with the post-regression orthogonal polynomial contrast  
23 function of Stata 14.2 We found no evidence to suggest that proportional hazards assumptions  
24 were violated.<sup>34</sup> All analyses were performed with Stata 14.2 (StataCorp LP, College Station,  
25 TX).  
26  
27  
28  
29  
30  
31  
32  
33  
34  
35  
36  
37  
38  
39  
40  
41  
42  
43  
44  
45  
46  
47

## 48 RESULTS

49 At baseline, most participants were  $\geq 60$  years old (61%) and non-Hispanic white (91%);  
50 59% were men (Table 1).  
51  
52  
53  
54  
55  
56  
57  
58  
59  
60

**Table 1. Baseline Characteristics of Sample by Subsequent Diagnosis of Colorectal Cancer over 10 Years of Follow Up, NIH-AARP Diet and Health Study, 1995-2006**

|                                                                              | Overall | Did Not Develop Colorectal Cancer | Developed Colorectal Cancer | P-value |
|------------------------------------------------------------------------------|---------|-----------------------------------|-----------------------------|---------|
| N                                                                            | 398,458 | 391,943                           | 6,515                       |         |
| <b>Age (years), %</b>                                                        |         |                                   |                             |         |
| <55                                                                          | 17.28   | 17.42                             | 7.97                        | <0.001  |
| 55-59                                                                        | 22.04   | 22.15                             | 15.25                       |         |
| 60-64                                                                        | 26.29   | 26.28                             | 27.50                       |         |
| 65-69                                                                        | 30.33   | 30.12                             | 43.29                       |         |
| > 69                                                                         | 4.06    | 4.03                              | 5.99                        |         |
| <b>Gender</b>                                                                |         |                                   |                             |         |
| Female, %                                                                    | 40.60   | 40.76                             | 31.19                       | <0.001  |
| <b>Race/Ethnicity, %</b>                                                     |         |                                   |                             |         |
| Non-Hispanic White                                                           | 92.31   | 92.30                             | 92.84                       | 0.031   |
| Non-Hispanic-Black                                                           | 3.99    | 3.98                              | 4.16                        |         |
| Hispanic                                                                     | 1.99    | 2.00                              | 1.65                        |         |
| Asian/Pacific Islander                                                       | 1.42    | 1.43                              | 1.06                        |         |
| American Indian/ Alaska Native                                               | 0.29    | 0.29                              | 0.30                        |         |
| <b>Education, %</b>                                                          |         |                                   |                             |         |
| High School                                                                  | 26.38   | 26.31                             | 30.40                       | <0.001  |
| Some College                                                                 | 34.24   | 34.23                             | 34.86                       |         |
| College Degree                                                               | 39.38   | 39.45                             | 34.74                       |         |
| <b>Smoking Status, %</b>                                                     |         |                                   |                             |         |
| Never                                                                        | 37.00   | 37.11                             | 30.71                       | <0.001  |
| Former                                                                       | 50.60   | 50.50                             | 56.68                       |         |
| Current                                                                      | 12.40   | 12.39                             | 12.61                       |         |
| <b>Physical Activity (<math>\geq 20</math> minutes in past 12 months), %</b> |         |                                   |                             |         |
| Never                                                                        | 4.41    | 4.40                              | 5.32                        | <0.001  |
| Rarely                                                                       | 13.63   | 13.61                             | 15.03                       |         |
| 1-2 times/month                                                              | 13.74   | 13.74                             | 13.93                       |         |
| 1-2 times/week                                                               | 21.78   | 21.78                             | 21.51                       |         |
| 2-4 times/week                                                               | 26.99   | 27.01                             | 25.99                       |         |
| 3-5 times/week                                                               | 19.45   | 19.47                             | 18.23                       |         |
| <b>Baseline weight status, %</b>                                             |         |                                   |                             |         |
| Normal                                                                       | 35.09   | 35.18                             | 29.98                       | <0.001  |
| Overweight                                                                   | 42.81   | 42.77                             | 44.88                       |         |
| Obese                                                                        | 22.10   | 22.05                             | 25.14                       |         |
| <b>Dietary Scores (mean <math>\pm</math> sd)</b>                             |         |                                   |                             |         |
| Mediterranean Diet                                                           | 4.20    | 4.20                              | 4.06                        | <0.001  |
| Health Eating Index                                                          | 65.94   | 65.97                             | 64.42                       | <0.001  |
| Dietary Approaches to Stop HTN                                               | 23.85   | 23.85                             | 23.41                       | <0.001  |
| <b>Food Consumption</b>                                                      |         |                                   |                             |         |
| Whole grain oz./day                                                          | 0.997   | 0.998                             | 0.962                       | 0.001   |
| Dark green vegetable cups/day                                                | 0.242   | 0.242                             | 0.221                       | <0.001  |
| Dry beans and peas cups/day                                                  | 0.101   | 0.101                             | 0.100                       | 0.472   |
| Fruit (excluding juice) cups/day                                             | 1.264   | 1.265                             | 1.223                       | 0.003   |
| Chicken and poultry oz./day                                                  | 0.968   | 0.968                             | 0.932                       | 0.003   |
| Fish high in omega-3 oz./day                                                 | 0.169   | 0.169                             | 0.165                       | 0.051   |
| Franks, sausages, luncheon meats oz./day                                     | 0.564   | 0.563                             | 0.628                       | <0.001  |
| Beef, pork, veal, lamb oz./day                                               | 1.625   | 1.622                             | 1.774                       | 0.001   |

Weight status was based on BMI (normal weight: 18.5 to < 25 kg/m<sup>2</sup>; overweight: 25 to < 30 kg/m<sup>2</sup>; obese:  $\geq 30$  kg/m<sup>2</sup>).  
Food consumption based on equivalent values from MyPyramid Equivalents Database (MPED).

1  
2  
3 About 35% of the sample were normal weight, 43% were overweight, and 22% were obese.  
4  
5 Mean (sd; range) scores for dietary quality were 4.2 (1.8; 0 - 9) for the Mediterranean Diet, 65.9  
6  
7 (10.7; 18.2 - 98.4) for the Healthy Eating Index 2010, and 23.8 (4.1; 8 - 37) for the DASH Diet.  
8  
9

10 Over a mean follow-up duration of 123 months, 6,515 participants (1.64%) were  
11  
12 diagnosed with colorectal cancer. There were 6,515 new diagnoses of colorectal cancer (1,953  
13  
14 among the normal weight, 2,924 among the overweight, and 1,638 among the obese; 4,483  
15  
16 among men and 2,032 among women). Of all new diagnoses, 9.7% were Stage 0; 38.4% were  
17  
18 Stage 1; 14.0% were Stage 2; 22.7% were Stage 3; and 15.3% were Stage 4. The percent of  
19  
20 those diagnosed with colorectal cancer increased moving across BMI categories from normal to  
21  
22 overweight to obese (1.4%, 1.7%, 1.9%; p-value from log-rank trend test < 0.0001).  
23  
24  
25  
26

27 From bivariate analyses, older age, being male, having lower levels of physical activity,  
28  
29 smoking, having less education, and being overweight or obese were associated with an  
30  
31 increased risk of colorectal cancer ( $p < 0.001$ ) (Table 1). Compared to non-Hispanic whites, the  
32  
33 incidence of colorectal cancer was higher for non-Hispanic blacks and lower for Asians/Pacific  
34  
35 Islanders ( $p = 0.031$ ). Those who developed colorectal cancer had lower scores for dietary  
36  
37 adherence and consumed more red and processed meats, less whole grains, less dark green  
38  
39 vegetables, and less fruits.  
40  
41  
42

43 Based on an overall multivariable model for the entire study population, the hazard of  
44  
45 incident colorectal cancer diagnosis was 32% less for women compared to men (aOR; 95% CI:  
46  
47 0.68; 0.64 - 0.73). Compared to those who had normal weight, the hazard of incident colorectal  
48  
49 cancer diagnosis was 13% greater for those who were overweight (aOR; 95% CI: 1.13; 1.05 -  
50  
51 1.21) and 30% greater for those who were obese (aOR; 95% CI: 1.30; 1.20 - 1.40).  
52  
53  
54  
55  
56  
57  
58  
59  
60

1  
2  
3  
4  
5  
6  
7  
8  
9  
10  
11  
12  
13  
14  
15  
16  
17  
18  
19  
20  
21  
22  
23  
24  
25  
26  
27  
28  
29  
30  
31  
32  
33  
34  
35  
36  
37  
38  
39  
40  
41  
42  
43  
44  
45  
46  
47  
48  
49  
50  
51  
52  
53  
54  
55  
56  
57  
58  
59  
60

|                                                                           | Mediterranean Diet |               | Healthy Eating Index |               | DASH Diet |               |
|---------------------------------------------------------------------------|--------------------|---------------|----------------------|---------------|-----------|---------------|
|                                                                           | $\beta$            | 95% CI        | $\beta$              | 95% CI        | $\beta$   | 95% CI        |
| <b>Age (years)</b>                                                        |                    |               |                      |               |           |               |
| <55                                                                       | ---                | ---           | ---                  | ---           | ---       | ---           |
| 55-59                                                                     | 0.14               | 0.12 - 0.16   | 1.07                 | 0.96 - 1.18   | 0.36      | 0.31 - 0.40   |
| 60-64                                                                     | 0.24               | 0.22 - 0.25   | 1.85                 | 1.74 - 1.95   | 0.70      | 0.66 - 0.74   |
| 65-69                                                                     | 0.27               | 0.25 - 0.29   | 2.30                 | 2.19 - 2.40   | 1.00      | 0.96 - 1.05   |
| > 69                                                                      | 0.30               | 0.27 - 0.33   | 2.73                 | 2.53 - 2.92   | 1.31      | 1.23 - 1.38   |
| <b>Gender</b>                                                             |                    |               |                      |               |           |               |
| Male                                                                      | ---                | ---           | ---                  | ---           | ---       | ---           |
| Female                                                                    | 0.49               | 0.47 - 0.50   | 2.71                 | 2.64 - 2.79   | 0.77      | 0.74 - 0.80   |
| <b>Race/Ethnicity</b>                                                     |                    |               |                      |               |           |               |
| Non-Hispanic White                                                        | ---                | ---           | ---                  | ---           | ---       | ---           |
| Non-Hispanic-Black                                                        | 0.25               | 0.22 - 0.28   | 1.03                 | 0.86 - 1.22   | -0.34     | -0.41 - -0.27 |
| Hispanic                                                                  | 0.01               | -0.03 - 0.04  | 0.89                 | 0.63 - 1.15   | 0.04      | -0.06 - 0.14  |
| Asian/Pacific Islander                                                    | -0.08              | -0.12 - -0.03 | -0.57                | -0.87 - -0.27 | -0.57     | -0.68 - -0.45 |
| American Indian/ Alaska Native                                            | 0.00               | -0.11 - 0.11  | 0.31                 | -0.34 - 0.97  | -0.15     | -0.41 - 0.10  |
| <b>Education</b>                                                          |                    |               |                      |               |           |               |
| High School                                                               | ---                | ---           | ---                  | ---           | ---       | ---           |
| Some College                                                              | 0.25               | 0.24 - 0.27   | 1.80                 | 1.71 - 1.90   | 0.65      | 0.62 - 0.68   |
| College Degree                                                            | 0.55               | 0.54 - 0.57   | 3.53                 | 3.44 - 3.62   | 1.39      | 1.35 - 1.42   |
| <b>Smoking Status</b>                                                     |                    |               |                      |               |           |               |
| Never                                                                     | ---                | ---           | ---                  | ---           | ---       | ---           |
| Former                                                                    | 0.01               | -0.00 - 0.24  | -0.30                | -0.38 - -0.22 | -0.17     | -0.20 - -0.14 |
| Current                                                                   | -0.64              | -0.67 - 0.62  | -5.48                | -5.61 - -5.37 | -2.04     | -2.08 - -1.99 |
| <b>Physical Activity (<math>\geq 20</math> minutes in past 12 months)</b> |                    |               |                      |               |           |               |
| Never                                                                     | ---                | ---           | ---                  | ---           | ---       | ---           |
| Rarely                                                                    | 0.14               | 0.11 - 0.17   | 1.15                 | 0.96 - 1.35   | 0.13      | 0.05 - 0.20   |
| 1-2 times/month                                                           | 0.30               | 0.26 - 0.33   | 2.52                 | 2.32 - 2.71   | 0.44      | 0.37 - 0.52   |
| 1-2 times/week                                                            | 0.52               | 0.48 - 0.55   | 4.09                 | 3.90 - 4.28   | 0.94      | 0.87 - 1.01   |
| 2-4 times/week                                                            | 0.77               | 0.75 - 0.80   | 5.98                 | 5.79 - 6.16   | 1.74      | 1.76 - 1.81   |
| 3-5 times/week                                                            | 0.89               | 0.84 - 0.90   | 6.68                 | 6.49 - 6.87   | 2.24      | 2.17 - 2.31   |
| <b>Weight Category</b>                                                    |                    |               |                      |               |           |               |
| Normal                                                                    | ---                | ---           | ---                  | ---           | ---       | ---           |
| Overweight                                                                | -0.14              | -0.15 - -0.13 | -0.32                | -0.40 - -0.24 | -0.35     | -0.38 - -0.32 |
| Obese                                                                     | -0.24              | -0.25 - -0.22 | -0.56                | -0.66 - -0.47 | -0.50     | -0.53 - -0.46 |

From separate linear regression models for each dietary measure, with adjustment for energy intake. Weight categories were based on BMI (normal: 18.5 to < 25 kg/m<sup>2</sup>; overweight: 25 to < 30 kg/m<sup>2</sup>; obese:  $\geq 30$  kg/m<sup>2</sup>).

Results from the linear regression models predicting dietary adherence and the measures of dietary quality are presented in Table 2. We found “dose-response” associations for older age, higher education, and more frequent physical activity with better scores for each dietary measure. Women had better adherence for all three dietary patterns. Those who were non-Hispanic Black had better dietary scores for the Mediterranean Diet and the Health Eating Index,

but had lower DASH scores. Asians/Pacific Islanders had slightly lower scores on all three dietary measures. Separate models for men and women revealed no important differences (data not shown).

**Table 3a. Hazard Ratios and 95% Confidence Intervals for Incidence of Colorectal Cancer by Baseline Dietary Pattern and Weight Category, NIH-AARP Diet and Health Study for Men, 1996-2006 (n=182,762)**

| Dietary Score                                                                                                                                                                                                                                                                                                                                                                                                                                                                             | Normal Weight |             | Overweight   |             | Obese        |             |
|-------------------------------------------------------------------------------------------------------------------------------------------------------------------------------------------------------------------------------------------------------------------------------------------------------------------------------------------------------------------------------------------------------------------------------------------------------------------------------------------|---------------|-------------|--------------|-------------|--------------|-------------|
|                                                                                                                                                                                                                                                                                                                                                                                                                                                                                           | Hazard Ratio  | 95% CI      | Hazard Ratio | 95% CI      | Hazard Ratio | 95% CI      |
| <b>Mediterranean Diet Quintiles</b>                                                                                                                                                                                                                                                                                                                                                                                                                                                       |               |             |              |             |              |             |
| 1                                                                                                                                                                                                                                                                                                                                                                                                                                                                                         | ---           | ---         | ---          | ---         | ---          | ---         |
| 2                                                                                                                                                                                                                                                                                                                                                                                                                                                                                         | 0.79          | 0.66 - 0.96 | 0.83         | 0.73 - 0.95 | 0.97         | 0.80 - 1.17 |
| 3                                                                                                                                                                                                                                                                                                                                                                                                                                                                                         | 0.66          | 0.54 - 0.82 | 0.91         | 0.79 - 1.04 | 0.99         | 0.82 - 1.21 |
| 4                                                                                                                                                                                                                                                                                                                                                                                                                                                                                         | 0.67          | 0.54 - 0.84 | 0.77         | 0.66 - 0.91 | 0.78         | 0.62 - 1.00 |
| 5                                                                                                                                                                                                                                                                                                                                                                                                                                                                                         | 0.65          | 0.51 - 0.83 | 0.73         | 0.60 - 0.88 | 0.79         | 0.59 - 1.08 |
| p for trend                                                                                                                                                                                                                                                                                                                                                                                                                                                                               | 0.0004        |             | 0.0013       |             | 0.0508       |             |
| <b>Healthy Eating Index Quintiles</b>                                                                                                                                                                                                                                                                                                                                                                                                                                                     |               |             |              |             |              |             |
| 1                                                                                                                                                                                                                                                                                                                                                                                                                                                                                         | ---           | ---         | ---          | ---         | ---          | ---         |
| 2                                                                                                                                                                                                                                                                                                                                                                                                                                                                                         | 0.94          | 0.77 - 1.14 | 0.80         | 0.69 - 0.92 | 0.94         | 0.77 - 1.14 |
| 3                                                                                                                                                                                                                                                                                                                                                                                                                                                                                         | 0.83          | 0.67 - 1.03 | 0.73         | 0.63 - 0.85 | 0.82         | 0.67 - 1.02 |
| 4                                                                                                                                                                                                                                                                                                                                                                                                                                                                                         | 0.73          | 0.58 - 0.91 | 0.81         | 0.70 - 0.94 | 0.88         | 0.71 - 1.10 |
| 5                                                                                                                                                                                                                                                                                                                                                                                                                                                                                         | 0.67          | 0.54 - 0.84 | 0.63         | 0.53 - 0.74 | 0.76         | 0.60 - 0.99 |
| p for trend                                                                                                                                                                                                                                                                                                                                                                                                                                                                               | 0.0001        |             | <0.0001      |             | 0.0394       |             |
| <b>Dietary Approaches to Stop Hypertension Quintiles</b>                                                                                                                                                                                                                                                                                                                                                                                                                                  |               |             |              |             |              |             |
| 1                                                                                                                                                                                                                                                                                                                                                                                                                                                                                         | ---           | ---         | ---          | ---         | ---          | ---         |
| 2                                                                                                                                                                                                                                                                                                                                                                                                                                                                                         | 0.91          | 0.08 - 1.11 | 0.82         | 0.72 - 0.94 | 0.71         | 0.59 - 0.87 |
| 3                                                                                                                                                                                                                                                                                                                                                                                                                                                                                         | 0.79          | 0.64 - 0.99 | 0.73         | 0.63 - 0.85 | 0.78         | 0.63 - 0.96 |
| 4                                                                                                                                                                                                                                                                                                                                                                                                                                                                                         | 0.83          | 0.66 - 1.04 | 0.69         | 0.59 - 0.82 | 0.80         | 0.64 - 1.00 |
| 5                                                                                                                                                                                                                                                                                                                                                                                                                                                                                         | 0.67          | 0.54 - 0.84 | 0.70         | 0.60 - 0.82 | 0.75         | 0.60 - 0.94 |
| p for trend                                                                                                                                                                                                                                                                                                                                                                                                                                                                               | 0.0005        |             | <0.0001      |             | 0.0801       |             |
| Cox proportional hazard models adjusted for age, gender, race/ethnicity, education, smoking, physical activity, and energy intake. Separate models were developed for each dietary pattern and weight category. Dietary categories (low, high) are based on tertiles of native score. The lowest tertile is the reference group. Weight categories were based on BMI (normal: 18.5 to < 25 kg/m <sup>2</sup> ; overweight: 25 to < 30 kg/m <sup>2</sup> ; obese: ≥30 kg/m <sup>2</sup> ). |               |             |              |             |              |             |

The first set of multivariable models were stratified by weight category and examined the association of incident CRC by quintile of dietary score. Based on these models, which included adjustment for age, gender, race/ethnicity, smoking, and physical activity, and energy intake, increasing dietary quality was consistently associated with decreasing hazard of incident CRC for men of normal weight or were overweight (Table 3a). For obese men, the same general patterns were apparent, but the statistical significance across quintiles of dietary quality was

more marginal than for the other two BMI categories. Smaller and more inconsistent associations, albeit generally in the same direction, were found for women of all three weight categories (Table 3b).

| <b>Table 3b. Hazard Ratios and 95% Confidence Intervals for Incidence of Colorectal Cancer by Baseline Dietary Pattern and Weight Category, NIH-AARP Diet and Health Study for Women, 1996-2006 (n=125,281)</b>                                                                                                                                                                                                                                 |               |             |              |             |              |             |
|-------------------------------------------------------------------------------------------------------------------------------------------------------------------------------------------------------------------------------------------------------------------------------------------------------------------------------------------------------------------------------------------------------------------------------------------------|---------------|-------------|--------------|-------------|--------------|-------------|
| Dietary Score                                                                                                                                                                                                                                                                                                                                                                                                                                   | Normal Weight |             | Overweight   |             | Obese        |             |
|                                                                                                                                                                                                                                                                                                                                                                                                                                                 | Hazard Ratio  | 95% CI      | Hazard Ratio | 95% CI      | Hazard Ratio | 95% CI      |
| <b>Mediterranean Diet Quintiles</b>                                                                                                                                                                                                                                                                                                                                                                                                             |               |             |              |             |              |             |
| 1                                                                                                                                                                                                                                                                                                                                                                                                                                               | ---           | ---         | ---          | ---         | ---          | ---         |
| 2                                                                                                                                                                                                                                                                                                                                                                                                                                               | 0.95          | 0.76 - 1.20 | 1.09         | 0.86 - 1.38 | 1.35         | 1.04 - 1.74 |
| 3                                                                                                                                                                                                                                                                                                                                                                                                                                               | 0.88          | 0.69 - 1.12 | 1.00         | 0.78 - 1.30 | 0.86         | 0.64 - 1.16 |
| 4                                                                                                                                                                                                                                                                                                                                                                                                                                               | 0.90          | 0.68 - 1.18 | 0.81         | 0.59 - 1.11 | 0.89         | 0.63 - 1.25 |
| 5                                                                                                                                                                                                                                                                                                                                                                                                                                               | 1.02          | 0.75 - 1.37 | 0.99         | 0.68 - 1.41 | 0.95         | 0.63 - 1.43 |
| p for trend                                                                                                                                                                                                                                                                                                                                                                                                                                     | 0.9384        |             | 0.4318       |             | 0.2633       |             |
| <b>Healthy Eating Index Quintiles</b>                                                                                                                                                                                                                                                                                                                                                                                                           |               |             |              |             |              |             |
| 1                                                                                                                                                                                                                                                                                                                                                                                                                                               | ---           | ---         | ---          | ---         | ---          | ---         |
| 2                                                                                                                                                                                                                                                                                                                                                                                                                                               | 0.77          | 0.58 - 1.01 | 0.87         | 0.65 - 1.16 | 0.85         | 0.63 - 1.15 |
| 3                                                                                                                                                                                                                                                                                                                                                                                                                                               | 0.71          | 0.54 - 0.94 | 0.94         | 0.71 - 1.25 | 0.90         | 0.67 - 1.21 |
| 4                                                                                                                                                                                                                                                                                                                                                                                                                                               | 0.71          | 0.54 - 0.93 | 0.73         | 0.55 - 0.98 | 0.82         | 0.60 - 1.12 |
| 5                                                                                                                                                                                                                                                                                                                                                                                                                                               | 0.83          | 0.64 - 1.08 | 0.64         | 0.47 - 0.86 | 0.71         | 0.51 - 0.99 |
| p for trend                                                                                                                                                                                                                                                                                                                                                                                                                                     | 0.1557        |             | 0.0018       |             | 0.0573       |             |
| <b>Dietary Approaches to Stop Hypertension Quintiles</b>                                                                                                                                                                                                                                                                                                                                                                                        |               |             |              |             |              |             |
| 1                                                                                                                                                                                                                                                                                                                                                                                                                                               | ---           | ---         | ---          | ---         | ---          | ---         |
| 2                                                                                                                                                                                                                                                                                                                                                                                                                                               | 0.86          | 0.68 - 1.09 | 0.86         | 0.67 - 1.10 | 1.00         | 0.77 - 1.30 |
| 3                                                                                                                                                                                                                                                                                                                                                                                                                                               | 0.70          | 0.53 - 0.93 | 0.92         | 0.70 - 1.20 | 0.78         | 0.57 - 1.06 |
| 4                                                                                                                                                                                                                                                                                                                                                                                                                                               | 0.86          | 0.66 - 1.13 | 0.74         | 0.54 - 1.00 | 0.72         | 0.51 - 1.00 |
| 5                                                                                                                                                                                                                                                                                                                                                                                                                                               | 0.73          | 0.56 - 0.95 | 0.83         | 0.62 - 1.11 | 0.73         | 0.52 - 1.02 |
| p for trend                                                                                                                                                                                                                                                                                                                                                                                                                                     | 0.0389        |             | 0.1256       |             | 0.0128       |             |
| Cox proportional hazard models adjusted for age, gender, race/ethnicity, education, smoking, physical activity, and energy intake. Separate models were developed for each dietary pattern and weight category. Dietary adherence categories are based on lowest and highest tertiles. Weight categories were based on BMI (normal: 18.5 to < 25 kg/m <sup>2</sup> ; overweight: 25 to < 30 kg/m <sup>2</sup> ; obese: ≥30 kg/m <sup>2</sup> ). |               |             |              |             |              |             |

Based on the multivariable model Cox regression models, we predicted the incidence of new colorectal cancer at 10 years separately for men (Table 4a) and women (Table 4b). We found almost no statistical significance for the interaction of dietary measures with weight category for both men and women, providing no basis for refuting the hypothesis that the association of diet with incidence CRC differs by weight category. As shown in Table 4a, we found statistically significant linear trends for men who were of normal weight and who were

overweight, suggesting a gradient affect for increasing dietary quality with decreasing incidence of colorectal cancer at 10 years. Likewise, among obese men we found generally similar trends, which were of more marginal statistical significance. Consistent with the previously described hazard ratios, the findings were also more mixed for women (Table 4b). For both men and women, the absolute predicted rates of colorectal cancer were consistently less than 2.5%.

**Table 4a. Probability and 95% Confidence Interval of Colorectal Cancer at 10 Years by Baseline Dietary Pattern and Weight Category, NIH-AARP Diet and Health Study for Men, 1996-2006 (n=182,762)**

| Dietary Score        | Mediterranean Diet |               | Healthy Eating Index |               | Dietary Approaches to Stop Hypertension |               |
|----------------------|--------------------|---------------|----------------------|---------------|-----------------------------------------|---------------|
|                      | Probability        | 95% CI        | Probability          | 95% CI        | Probability                             | 95% CI        |
| <b>Normal Weight</b> |                    |               |                      |               |                                         |               |
| Quintile 1           | 0.019              | 0.011 - 0.028 | 0.019                | 0.011 - 0.028 | 0.019                                   | 0.010 - 0.027 |
| Quintile 2           | 0.015              | 0.008 - 0.003 | 0.017                | 0.009 - 0.025 | 0.017                                   | 0.009 - 0.025 |
| Quintile 3           | 0.013              | 0.007 - 0.019 | 0.015                | 0.008 - 0.022 | 0.015                                   | 0.007 - 0.022 |
| Quintile 4           | 0.013              | 0.007 - 0.019 | 0.013                | 0.007 - 0.019 | 0.015                                   | 0.008 - 0.022 |
| Quintile 5           | 0.012              | 0.006 - 0.019 | 0.012                | 0.006 - 0.018 | 0.012                                   | 0.006 - 0.018 |
| p-for-trend          | 0.0002             |               | <0.0001              |               | 0.0001                                  |               |
| <b>Overweight</b>    |                    |               |                      |               |                                         |               |
| Quintile 1           | 0.019              | 0.011 - 0.028 | 0.022                | 0.011 - 0.032 | 0.021                                   | 0.011 - 0.031 |
| Quintile 2           | 0.016              | 0.009 - 0.024 | 0.017                | 0.009 - 0.025 | 0.018                                   | 0.010 - 0.026 |
| Quintile 3           | 0.018              | 0.010 - 0.027 | 0.016                | 0.008 - 0.023 | 0.016                                   | 0.008 - 0.024 |
| Quintile 4           | 0.016              | 0.009 - 0.023 | 0.018                | 0.009 - 0.026 | 0.016                                   | 0.008 - 0.023 |
| Quintile 5           | 0.015              | 0.008 - 0.022 | 0.014                | 0.007 - 0.020 | 0.016                                   | 0.008 - 0.023 |
| p-for-trend          | 0.0017             |               | < 0.0001             |               | <0.0001                                 |               |
| <b>Obese</b>         |                    |               |                      |               |                                         |               |
| Quintile 1           | 0.021              | 0.011 - 0.030 | 0.022                | 0.012 - 0.032 | 0.024                                   | 0.012 - 0.035 |
| Quintile 2           | 0.020              | 0.011 - 0.030 | 0.021                | 0.011 - 0.031 | 0.017                                   | 0.009 - 0.026 |
| Quintile 3           | 0.021              | 0.011 - 0.031 | 0.019                | 0.009 - 0.027 | 0.019                                   | 0.010 - 0.029 |
| Quintile 4           | 0.017              | 0.009 - 0.026 | 0.020                | 0.011 - 0.029 | 0.020                                   | 0.010 - 0.030 |
| Quintile 5           | 0.017              | 0.008 - 0.026 | 0.017                | 0.009 - 0.026 | 0.019                                   | 0.010 - 0.028 |
| p-for-trend          | 0.0212             |               | 0.0304               |               | 0.0502                                  |               |

Probabilities are based on a Cox model that adjusts for age, gender, race/ethnicity, education, smoking, physical activity, and energy intake. Models include interaction terms for baseline dietary scores and weight category. Separate models were developed for each dietary pattern. Weight categories were based on BMI (normal: 18.5 to < 25 kg/m<sup>2</sup>; overweight: 25 to < 30 kg/m<sup>2</sup>; obese: ≥30 kg/m<sup>2</sup>).

P-values for interaction terms for quintiles of Mediterranean Diet and weight category are: Q2-overweight, 0.626; Q2-obese 0.159; Q3-overweight, 0.008; Q3-obese, 0.006; Q4-overweight, 0.250; Q4-obese, 0.408; Q5-overweight, 0.367; Q5-obese, 0.366. P-values for interaction terms for quintiles of Healthy Eating Index and weight category are: Q2-overweight, 0.227; Q2-obese 0.961; Q3-overweight, 0.411; Q3-obese, 0.974; Q4-overweight, 0.304; Q4-obese, 0.164; Q5-overweight, 0.726; Q5-obese, 0.381. P-values for interaction terms for quintiles of Dietary Approaches to Stop Hypertension and weight category are: Q2-overweight, 0.486; Q2-obese 0.090; Q3-overweight, 0.733; Q3-obese, 0.974; Q4-overweight, 0.344; Q4-obese, 0.920; Q5-overweight, 0.482; Q5-obese, 0.411.

**Table 4b. Probability and 95% Confidence Interval of Colorectal Cancer at 10 Years by Baseline Dietary Pattern and Weight Category, NIH-AARP Diet and Health Study for Women, 1996-2006 (n=125,281)**

| Dietary Score                                                                                                                                                                                                                                                                                                                                                                                                                                                                                                                                                                                                                                                                                                                                                                                                                                                                                                                                                                                                                                                                                                                                                                                                                                                | Mediterranean Diet |               | Healthy Eating Index |               | Dietary Approaches to Stop Hypertension |               |
|--------------------------------------------------------------------------------------------------------------------------------------------------------------------------------------------------------------------------------------------------------------------------------------------------------------------------------------------------------------------------------------------------------------------------------------------------------------------------------------------------------------------------------------------------------------------------------------------------------------------------------------------------------------------------------------------------------------------------------------------------------------------------------------------------------------------------------------------------------------------------------------------------------------------------------------------------------------------------------------------------------------------------------------------------------------------------------------------------------------------------------------------------------------------------------------------------------------------------------------------------------------|--------------------|---------------|----------------------|---------------|-----------------------------------------|---------------|
|                                                                                                                                                                                                                                                                                                                                                                                                                                                                                                                                                                                                                                                                                                                                                                                                                                                                                                                                                                                                                                                                                                                                                                                                                                                              | Probability        | 95% CI        | Probability          | 95% CI        | Probability                             | 95% CI        |
| <b>Normal Weight</b>                                                                                                                                                                                                                                                                                                                                                                                                                                                                                                                                                                                                                                                                                                                                                                                                                                                                                                                                                                                                                                                                                                                                                                                                                                         |                    |               |                      |               |                                         |               |
| Quintile 1                                                                                                                                                                                                                                                                                                                                                                                                                                                                                                                                                                                                                                                                                                                                                                                                                                                                                                                                                                                                                                                                                                                                                                                                                                                   | 0.011              | 0.001 - 0.021 | 0.013                | 0.001 - 0.025 | 0.012                                   | 0.001 - 0.023 |
| Quintile 2                                                                                                                                                                                                                                                                                                                                                                                                                                                                                                                                                                                                                                                                                                                                                                                                                                                                                                                                                                                                                                                                                                                                                                                                                                                   | 0.010              | 0.001 - 0.020 | 0.010                | 0.000 - 0.019 | 0.011                                   | 0.001 - 0.021 |
| Quintile 3                                                                                                                                                                                                                                                                                                                                                                                                                                                                                                                                                                                                                                                                                                                                                                                                                                                                                                                                                                                                                                                                                                                                                                                                                                                   | 0.009              | 0.000 - 0.018 | 0.009                | 0.000 - 0.018 | 0.009                                   | 0.000 - 0.017 |
| Quintile 4                                                                                                                                                                                                                                                                                                                                                                                                                                                                                                                                                                                                                                                                                                                                                                                                                                                                                                                                                                                                                                                                                                                                                                                                                                                   | 0.010              | 0.000 - 0.019 | 0.009                | 0.000 - 0.018 | 0.011                                   | 0.001 - 0.021 |
| Quintile 5                                                                                                                                                                                                                                                                                                                                                                                                                                                                                                                                                                                                                                                                                                                                                                                                                                                                                                                                                                                                                                                                                                                                                                                                                                                   | 0.011              | 0.000 - 0.021 | 0.011                | 0.001 - 0.022 | 0.009                                   | 0.000 - 0.018 |
| p-for-trend                                                                                                                                                                                                                                                                                                                                                                                                                                                                                                                                                                                                                                                                                                                                                                                                                                                                                                                                                                                                                                                                                                                                                                                                                                                  | 0.9396             |               | 0.1547               |               | 0.0426                                  |               |
| <b>Overweight</b>                                                                                                                                                                                                                                                                                                                                                                                                                                                                                                                                                                                                                                                                                                                                                                                                                                                                                                                                                                                                                                                                                                                                                                                                                                            |                    |               |                      |               |                                         |               |
| Quintile 1                                                                                                                                                                                                                                                                                                                                                                                                                                                                                                                                                                                                                                                                                                                                                                                                                                                                                                                                                                                                                                                                                                                                                                                                                                                   | 0.012              | 0.001 - 0.024 | 0.014                | 0.001 - 0.028 | 0.013                                   | 0.001 - 0.026 |
| Quintile 2                                                                                                                                                                                                                                                                                                                                                                                                                                                                                                                                                                                                                                                                                                                                                                                                                                                                                                                                                                                                                                                                                                                                                                                                                                                   | 0.013              | 0.007 - 0.025 | 0.012                | 0.001 - 0.024 | 0.012                                   | 0.001 - 0.023 |
| Quintile 3                                                                                                                                                                                                                                                                                                                                                                                                                                                                                                                                                                                                                                                                                                                                                                                                                                                                                                                                                                                                                                                                                                                                                                                                                                                   | 0.012              | 0.001 - 0.023 | 0.014                | 0.001 - 0.026 | 0.012                                   | 0.001 - 0.024 |
| Quintile 4                                                                                                                                                                                                                                                                                                                                                                                                                                                                                                                                                                                                                                                                                                                                                                                                                                                                                                                                                                                                                                                                                                                                                                                                                                                   | 0.009              | 0.000 - 0.018 | 0.011                | 0.000 - 0.021 | 0.010                                   | 0.000 - 0.019 |
| Quintile 5                                                                                                                                                                                                                                                                                                                                                                                                                                                                                                                                                                                                                                                                                                                                                                                                                                                                                                                                                                                                                                                                                                                                                                                                                                                   | 0.011              | 0.000 - 0.022 | 0.010                | 0.000 - 0.019 | 0.011                                   | 0.000 - 0.022 |
| p-for-trend                                                                                                                                                                                                                                                                                                                                                                                                                                                                                                                                                                                                                                                                                                                                                                                                                                                                                                                                                                                                                                                                                                                                                                                                                                                  | 0.1391             |               | 0.0015               |               | 0.0242                                  |               |
| <b>Obese</b>                                                                                                                                                                                                                                                                                                                                                                                                                                                                                                                                                                                                                                                                                                                                                                                                                                                                                                                                                                                                                                                                                                                                                                                                                                                 |                    |               |                      |               |                                         |               |
| Quintile 1                                                                                                                                                                                                                                                                                                                                                                                                                                                                                                                                                                                                                                                                                                                                                                                                                                                                                                                                                                                                                                                                                                                                                                                                                                                   | 0.013              | 0.001 - 0.024 | 0.015                | 0.001 - 0.030 | 0.014                                   | 0.001 - 0.028 |
| Quintile 2                                                                                                                                                                                                                                                                                                                                                                                                                                                                                                                                                                                                                                                                                                                                                                                                                                                                                                                                                                                                                                                                                                                                                                                                                                                   | 0.018              | 0.001 - 0.034 | 0.013                | 0.001 - 0.026 | 0.015                                   | 0.001 - 0.030 |
| Quintile 3                                                                                                                                                                                                                                                                                                                                                                                                                                                                                                                                                                                                                                                                                                                                                                                                                                                                                                                                                                                                                                                                                                                                                                                                                                                   | 0.012              | 0.001 - 0.023 | 0.014                | 0.001 - 0.028 | 0.012                                   | 0.000 - 0.024 |
| Quintile 4                                                                                                                                                                                                                                                                                                                                                                                                                                                                                                                                                                                                                                                                                                                                                                                                                                                                                                                                                                                                                                                                                                                                                                                                                                                   | 0.013              | 0.000 - 0.025 | 0.013                | 0.001 - 0.026 | 0.012                                   | 0.000 - 0.023 |
| Quintile 5                                                                                                                                                                                                                                                                                                                                                                                                                                                                                                                                                                                                                                                                                                                                                                                                                                                                                                                                                                                                                                                                                                                                                                                                                                                   | 0.014              | 0.000 - 0.027 | 0.011                | 0.000 - 0.023 | 0.013                                   | 0.000 - 0.025 |
| p-for-trend                                                                                                                                                                                                                                                                                                                                                                                                                                                                                                                                                                                                                                                                                                                                                                                                                                                                                                                                                                                                                                                                                                                                                                                                                                                  | 0.5725             |               | 0.0370               |               | 0.0399                                  |               |
| <p>Probabilities are based on a Cox model that adjusts for age, gender, race/ethnicity, education, smoking, physical activity, and energy intake. Models include interaction terms for baseline dietary scores and weight category. Separate models were developed for each dietary pattern. Weight categories were based on BMI (normal: 18.5 to &lt; 25 kg/m<sup>2</sup>; overweight: 25 to &lt; 30 kg/m<sup>2</sup>; obese: ≥30 kg/m<sup>2</sup>).</p> <p>P-values for interaction terms for quintiles of Mediterranean Diet and weight category are: Q2-overweight, 0.524; Q2-obese 0.024; Q3-overweight, 0.651; Q3-obese, 0.826; Q4-overweight, 0.354; Q4-obese, 0.660; Q5-overweight, 0.547; Q5-obese, 0.881. P-values for interaction terms for quintiles of Healthy Eating Index and weight category are: Q2-overweight, 0.554; Q2-obese 0.664; Q3-overweight, 0.154; Q3-obese, 0.290; Q4-overweight, 0.880; Q4-obese, 0.542; Q5-overweight, 0.156; Q5-obese, 0.358. P-values for interaction terms for quintiles of Dietary Approaches to Stop Hypertension and weight category are: Q2-overweight, 0.902; Q2-obese 0.328; Q3-overweight, 0.254; Q3-obese, 0.530; Q4-overweight, 0.256; Q4-obese, 0.525; Q5-overweight, 0.866; Q5-obese, 0.714.</p> |                    |               |                      |               |                                         |               |



## DISCUSSION

In this large national study of nearly 400,000 of middle aged and older adults, we found that baseline high quality diets as measured by three diet quality indices (Mediterranean Diet Score, the Healthy Eating Index 2010, and the Dietary Approaches to Stop Hypertension Score) were each associated with lower risk of CRC over a subsequent 10-year period among men who were of normal weight and overweight in a generally consistent “dose-response” effect. Trends were less consistent and of smaller magnitude among men who were obese and women in all three weight categories.

Although previous studies have not examined differences according to baseline weight status, our findings are consistent with other studies demonstrating that higher dietary quality is associated with reduced risk of colorectal adenoma in general.<sup>13</sup> For example, a recent narrative review of publications using the Nurses’ Health Study (1976-2016) identified red and processed meat, alcohol, smoking and obesity as factors that increase the risk of CRC.<sup>15</sup> Likewise, an ecological study suggested that 76% of the inter-country variation in colorectal cancer incidence was explained by meat, fish, and olive oil intake, with olive oil intake being associated with reduced risk.<sup>2</sup>

A review of epidemiological studies investigating the associations between dietary patterns including the DASH, the Mediterranean Diet, and the Healthy Eating Index has also shown a consistently reduced risk of colorectal adenoma and cancer incidence of higher scores on all of the dietary indexes for men, but was less conclusive for women.<sup>13 35</sup> Another large prospective examination of four established DASH indexes found that greater compliance with the DASH dietary pattern was associated with a reduced risk of CRC for both men and women.<sup>36</sup> This consistency across the three dietary patterns is not surprising because each of these dietary

1  
2  
3 approaches is built on a similar foundation of fresh fruits and vegetables, whole grains, and low  
4 saturated fat.  
5  
6

7  
8 There are physiologic mechanisms through which diet may be associated with a reduced  
9 risk of CRC and through which this association may differ for men and for women. For  
10 example, studies focused on individual nutrients suggest that olive oil may exert a reduced risk  
11 of CRC by influencing secondary bile acid patterns in the colon. This may in turn affect  
12 polyamine metabolism in colonic enterocytes, reducing progression from normal mucosa to  
13 adenoma and carcinoma.<sup>3</sup> Fiber intake may reduce the contact between carcinogens and the  
14 lining of the colon/rectum and increase stool bulk, which dilutes fecal carcinogens and decreases  
15 transit time.<sup>2,7</sup> Red and processed meat may exert a carcinogenic effect due to heme iron, N-nitro  
16 compounds and heterocyclic amines generated during cooking at high temperatures as well as a  
17 pro-neoplastic effect due to increased adiposity and insulin. Other studies suggest that dietary  
18 patterns that include a high consumption of high saturated fatty acid intake may increase CRC  
19 risk via their effects on serum insulin concentrations and on the bioavailability of insulin-like  
20 growth factor-I (IGF-I).<sup>37</sup> Whole grain intake has been associated with decreased fasting insulin  
21 level and improved insulin sensitivity.<sup>7,38</sup>  
22  
23  
24  
25  
26  
27  
28  
29  
30  
31  
32  
33  
34  
35  
36  
37  
38  
39  
40

41 The differential response of dietary intake to risk of CRC incidence by sex in our study  
42 could be explained by differences in the etiology of CRC between men and women.<sup>13</sup> Studies  
43 have indicated that women are more likely to develop proximal CRC compared to men.<sup>39</sup>  
44 Because proximal and distal CRC appear to arise from different pathways it is possible that the  
45 response to dietary intake varies by proximal and distal location type.<sup>39</sup> Hormonal factors may  
46 also be responsible for sex differences CRC etiology. Studies of postmenopausal hormone  
47 therapy and colorectal cancer report a reduction in risk of colon cancer and a decrease in the risk  
48  
49  
50  
51  
52  
53  
54  
55  
56  
57  
58  
59  
60

1  
2  
3 of rectal cancer for postmenopausal women who had ever taken hormone therapy compared with  
4  
5 women who never used hormones. The CRC risk reduction appears to be stronger for current and  
6  
7 long-term hormone users.<sup>40 41</sup>  
8  
9

10 The association was of borderline significance and inconsistent across the three dietary  
11  
12 measures for obese men and women. It is plausible that the beneficial effects of a healthy diet  
13  
14 are attenuated by the inflammatory, hormonal, and other metabolic changes induced by obesity  
15  
16 that promote colorectal carcinogenesis.<sup>42</sup> For example, the gut microbiome that provides  
17  
18 important metabolic capabilities, is responsive to alterations of diet,<sup>43</sup> and has been shown in  
19  
20 obese people to be different from, and less diverse than, those of the non-obese.<sup>44</sup>  
21  
22  
23

24 Our study has some limitations. Our analytic dataset excluded those with family history  
25  
26 of colorectal cancer and are therefore only generalize to those who are of average risk. Medical  
27  
28 co-morbidity was not included as a covariate in the multivariable models. Our study population  
29  
30 was relatively homogenous with upper-to-middle class Americans in urban centers: non-whites  
31  
32 comprised a relatively small proportion of our sample. Dietary intake was self-reported and  
33  
34 assessed using a single baseline Food Frequency Questionnaire, thus, there is potential for non-  
35  
36 differential measurement error.<sup>45</sup> With only a single measure, we could not examine changes in  
37  
38 dietary intake over time. It is possible that the observed differences between men and women are  
39  
40 artifacts from how the data were collected. For example, it has been suggested that differential  
41  
42 bias could be introduced by the way women and men complete the Food Frequency  
43  
44 Questionnaire.<sup>45 46</sup> Women in the AARP (as a group) may have more variation in diet patterns  
45  
46 and perception of dietary intake (and weight status) over time than men.<sup>25</sup> Additionally, there is  
47  
48 evidence that difference in dietary patterns may vary for men and women who respond in a  
49  
50 similar manner to the same survey.<sup>13</sup> Over 90% of the sample was non-Hispanic white. The  
51  
52  
53  
54  
55  
56  
57  
58  
59  
60

1  
2  
3 research consistently shows that incident rates of CRC and obesity prevalence are higher in  
4 African Americans compared to whites.<sup>47 48</sup> Although our sample was drawn from a nationally  
5 representative sample, it is not representative of adults in that age group because individuals  
6 from low socioeconomic status were not included. This is important because despite steady  
7 improvements in healthy eating patterns among US adults the overall dietary quality remains  
8 poor particularly in low income populations.<sup>49 50</sup>  
9  
10  
11  
12  
13  
14  
15  
16  
17  
18  
19

## 20 CONCLUSION

21  
22 This longitudinal national study of 398,458 middle aged and older adults found that  
23 among normal-weight and overweight men, CRC risk was 25-30% lower with high adherence to  
24 each dietary measure. Health benefits of consuming a high-quality diet extend to normal weight  
25 men, offering potential insights about approaches to cancer prevention. Additional research is  
26 needed to understand the weaker and less consistent results for women.  
27  
28  
29  
30  
31  
32  
33  
34  
35  
36  
37  
38  
39  
40  
41  
42  
43  
44  
45  
46  
47  
48  
49  
50  
51  
52  
53  
54  
55  
56  
57  
58  
59  
60

1  
2  
3 **Acknowledgments:** This research was supported [in part] by the Intramural Research Program  
4 of the NIH, National Cancer Institute. Cancer incidence data from the Atlanta metropolitan area  
5 were collected by the Georgia Center for Cancer Statistics, Department of Epidemiology, Rollins  
6 School of Public Health, Emory University, Atlanta, Georgia. Cancer incidence data from  
7 California were collected by the California Cancer Registry, California Department of Public  
8 Health's Cancer Surveillance and Research Branch, Sacramento, California. Cancer incidence  
9 data from the Detroit metropolitan area were collected by the Michigan Cancer Surveillance  
10 Program, Community Health Administration, Lansing, Michigan. The Florida cancer incidence  
11 data used in this report were collected by the Florida Cancer Data System (Miami, Florida) under  
12 contract with the Florida Department of Health, Tallahassee, Florida. The views expressed herein  
13 are solely those of the authors and do not necessarily reflect those of the FCDC or FDOH.  
14 Cancer incidence data from Louisiana were collected by the Louisiana Tumor Registry,  
15 Louisiana State University Health Sciences Center School of Public Health, New Orleans,  
16 Louisiana. Cancer incidence data from New Jersey were collected by the New Jersey State  
17 Cancer Registry, The Rutgers Cancer Institute of New Jersey, New Brunswick, New Jersey.  
18 Cancer incidence data from North Carolina were collected by the North Carolina Central Cancer  
19 Registry, Raleigh, North Carolina. Cancer incidence data from Pennsylvania were supplied by  
20 the Division of Health Statistics and Research, Pennsylvania Department of Health, Harrisburg,  
21 Pennsylvania. The Pennsylvania Department of Health specifically disclaims responsibility for  
22 any analyses, interpretations or conclusions. Cancer incidence data from Arizona were collected  
23 by the Arizona Cancer Registry, Division of Public Health Services, Arizona Department of  
24 Health Services, Phoenix, Arizona. Cancer incidence data from Texas were collected by the  
25 Texas Cancer Registry, Cancer Epidemiology and Surveillance Branch, Texas Department of  
26 State Health Services, Austin, Texas. Cancer incidence data from Nevada were collected by the  
27 Nevada Central Cancer Registry, Division of Public and Behavioral Health, State of Nevada  
28 Department of Health and Human Services, Carson City, Nevada.

29  
30 We are indebted to the participants in the NIH-AARP Diet and Health Study for their  
31 outstanding cooperation. We also thank Sigurd Hermansen and Kerry Grace Morrissey from  
32 Westat for study outcomes ascertainment and management and Leslie Carroll at Information  
33 Management Services for data support and analysis.

34  
35 The authors want to gratefully acknowledge and thank Drs. Rachel Ballard-Barbash and Jill  
36 Reedy for their invaluable feedback on the manuscript.

37  
38 **Competing Interests:** None declared

39  
40 **Funding Support:** The content of this manuscript was developed with funding from the  
41 National Cancer Institute at the National Institutes of Health (U01-CA1517361, PI: Doubeni).  
42 The contents of this manuscript do not necessarily reflect the views of the funding agencies and  
43 you should not assume endorsement by the Federal Government.

44  
45 Research reported in this publication was supported by the National Institute of Minority Health  
46 and Health Disparities of the National Institutes of Health under Award Number P60MD006912  
47 (PI: Allison). The content is solely the responsibility of the authors and does not necessarily  
48 represent the official views of the National Institutes of Health.

1  
2  
3 Partial support for Dr. Waring provided by NIH grants KL2TR000160 and U01HL105268.  
4  
5

6 Dr. Cutrona was supported by the National Center for Advancing Translational Sciences of the  
7 National Institutes of Health under award number KL2TR000160. The content is solely the  
8 responsibility of the authors and does not necessarily represent the official views of the NIH.  
9  
10  
11  
12  
13  
14  
15  
16  
17  
18  
19  
20  
21  
22  
23  
24  
25  
26  
27  
28  
29  
30  
31  
32  
33  
34  
35  
36  
37  
38  
39  
40  
41  
42  
43  
44  
45  
46  
47  
48  
49  
50  
51  
52  
53  
54  
55  
56  
57  
58  
59  
60

For peer review only

## References

1. Siegel RL, Miller KD, Jemal A. Cancer statistics, 2016. *CA: a cancer journal for clinicians* 2016;66(1):7-30.
2. Huxley RR, Ansary-Moghaddam A, Clifton P, et al. The impact of dietary and lifestyle risk factors on risk of colorectal cancer: a quantitative overview of the epidemiological evidence. *Int J Cancer* 2009;125(1):171-80. doi: 10.1002/ijc.24343 [published Online First: 2009/04/08]
3. Stoneham M, Goldacre M, Seagroatt V, et al. Olive oil, diet and colorectal cancer: an ecological study and a hypothesis. *J Epidemiol Community Health* 2000;54(10):756-60. [published Online First: 2000/09/16]
4. Kontou N, Psaltopoulou T, Soupos N, et al. The mediating effect of Mediterranean diet on the relation between smoking and colorectal cancer: a case-control study. *Eur J Public Health* 2012 doi: cks109 [pii]10.1093/eurpub/cks109 [published Online First: 2012/08/22]
5. Fuchs CS, Giovannucci EL, Colditz GA, et al. Dietary fiber and the risk of colorectal cancer and adenoma in women. *N Engl J Med* 1999;340(3):169-76. doi: 10.1056/NEJM199901213400301 [published Online First: 1999/01/23]
6. Park Y, Hunter DJ, Spiegelman D, et al. Dietary fiber intake and risk of colorectal cancer: a pooled analysis of prospective cohort studies. *JAMA* 2005;294(22):2849-57. doi: 294/22/2849 [pii]10.1001/jama.294.22.2849 [published Online First: 2005/12/15]
7. Aune D, Chan DS, Lau R, et al. Dietary fibre, whole grains, and risk of colorectal cancer: systematic review and dose-response meta-analysis of prospective studies. *BMJ* 2011;343:d6617. [published Online First: 2011/11/15]
8. Doubeni CA, Major JM, Laiyemo AO, et al. Contribution of Behavioral Risk Factors and Obesity to Socioeconomic Differences in Colorectal Cancer Incidence. *JNCI Journal of the National Cancer Institute* 2012;104(18):1353-62. doi: 10.1093/jnci/djs346
9. Larsson SC, Wolk A. Obesity and colon and rectal cancer risk: a meta-analysis of prospective studies. *Am J Clin Nutr* 2007;86(3):556-65. doi: 86/3/556 [pii] [published Online First: 2007/09/08]
10. Moghaddam AA, Woodward M, Huxley R. Obesity and risk of colorectal cancer: a meta-analysis of 31 studies with 70,000 events. *Cancer Epidemiol Biomarkers Prev* 2007;16(12):2533-47. doi: 16/12/2533 [pii]10.1158/1055-9965.EPI-07-0708 [published Online First: 2007/12/19]
11. Howard RA, Freedman DM, Park Y, et al. Physical activity, sedentary behavior, and the risk of colon and rectal cancer in the NIH-AARP Diet and Health Study. *Cancer Causes Control* 2008;19(9):939-53. doi: 10.1007/s10552-008-9159-0 [published Online First: 2008/04/26]
12. Siegel EM, Ulrich CM, Poole EM, et al. The effects of obesity and obesity-related conditions on colorectal cancer prognosis. *Cancer Control* 2010;17(1):52-7. [published Online First: 2009/12/17]
13. Reedy J, Mitrou PN, Krebs-Smith SM, et al. Index-based dietary patterns and risk of colorectal cancer: the NIH-AARP Diet and Health Study. *Am J Epidemiol* 2008;168(1):38-48. doi: kwn097 [pii]10.1093/aje/kwn097 [published Online First: 2008/06/06]
14. Bamia C, Lagiou P, Buckland G, et al. Mediterranean diet and colorectal cancer risk: results from a European cohort. *Eur J Epidemiol* 2013;28(4):317-28. doi: 10.1007/s10654-013-9795-x
15. Lee DH, Keum N, Giovannucci EL. Colorectal Cancer Epidemiology in the Nurses' Health Study. *American Journal of Public Health* 2016;106(9):1599-607. doi: 10.2105/AJPH.2016.303320

16. Pignone M, Rich M, Teutsch SM, et al. Screening for colorectal cancer in adults at average risk: a summary of the evidence for the U.S. Preventive Services Task Force. *Ann Intern Med* 2002;137(2):132-41.
17. Lebowitz B, Capiak K, Neugut AI, et al. Risk of colorectal adenomas and advanced neoplasia in Hispanic, black and white patients undergoing screening colonoscopy. *Aliment Pharmacol Ther* 2012;35(12):1467-73. doi: 10.1111/j.1365-2036.2012.05119.x
18. Platz EA, Willett WC, Colditz GA, et al. Proportion of colon cancer risk that might be preventable in a cohort of middle-aged US men. *Cancer Causes Control* 2000;11(7):579-88.
19. Ogden CL, Carroll MD, Kit BK, et al. Prevalence of childhood and adult obesity in the United States, 2011-2012. *JAMA* 2014;311(8):806-14. doi: 10.1001/jama.2014.732
20. Amine E, Baba N, Belhadj M, et al. Diet, nutrition and the prevention of chronic diseases: report of a Joint WHO/FAO Expert Consultation: World Health Organization 2002.
21. Sacks FM, Obarzanek E, Windhauser MM, et al. Rationale and design of the Dietary Approaches to Stop Hypertension trial (DASH): a multicenter controlled-feeding study of dietary patterns to lower blood pressure. *Annals of epidemiology* 1995;5(2):108-18.
22. Karanja NM, Obarzanek E, Lin P-H, et al. Descriptive characteristics of the dietary patterns used in the Dietary Approaches to Stop Hypertension trial. *Journal of the American Dietetic Association* 1999;99(8):S19-S27.
23. Knuops KB, de Groot LM, Kromhout D, et al. Mediterranean diet, lifestyle factors, and 10-year mortality in elderly European men and women: The Hale project. *JAMA* 2004;292(12):1433-39. doi: 10.1001/jama.292.12.1433
24. Jensen MD, Ryan DH, Apovian CM, et al. 2013 AHA/ACC/TOS Guideline for the Management of Overweight and Obesity in Adults: A Report of the American College of Cardiology/American Heart Association Task Force on Practice Guidelines and The Obesity Society. *Journal of the American College of Cardiology* 2014;63(25\_PA) doi: 10.1016/j.jacc.2013.11.004
25. Schatzkin A, Subar AF, Thompson FE, et al. Design and serendipity in establishing a large cohort with wide dietary intake distributions: the National Institutes of Health-American Association of Retired Persons Diet and Health Study. *Am J Epidemiol* 2001;154(12):1119-25.
26. Thompson FE, Subar AF, Brown CC, et al. Cognitive research enhances accuracy of food frequency questionnaire reports: results of an experimental validation study. *Journal of the American Dietetic Association* 2002;102(2):212-25.
27. Thompson FE, Kipnis V, Midthune D, et al. Performance of a food-frequency questionnaire in the US NIH-AARP (National Institutes of Health-American Association of Retired Persons) Diet and Health Study. *Public Health Nutr* 2008;11(2):183-95. doi: 10.1017/S1368980007000419
28. Guenther PM, Kirkpatrick SI, Reedy J, et al. The Healthy Eating Index-2010 is a valid and reliable measure of diet quality according to the 2010 Dietary Guidelines for Americans. *J Nutr* 2014;144(3):399-407. doi: 10.3945/jn.113.183079
29. Fung TT, Hu FB, McCullough ML, et al. Diet Quality Is Associated with the Risk of Estrogen Receptor-Negative Breast Cancer in Postmenopausal Women. *The Journal of Nutrition* 2006;136(2):466-72.
30. Reedy J, Krebs-Smith SM, Miller PE, et al. Higher diet quality is associated with decreased risk of all-cause, cardiovascular disease, and cancer mortality among older adults. *J Nutr* 2014;144(6):881-9. doi: 10.3945/jn.113.189407
31. Mitrou PN, Kipnis V, Thiebaut AC, et al. Mediterranean dietary pattern and prediction of all-cause mortality in a US population: results from the NIH-AARP Diet and Health Study. *Arch Intern Med* 2007;167(22):2461-8. doi: 10.1001/archinte.167.22.2461 [published Online First: 2007/12/12]



- 1  
2  
3  
4  
5  
6  
7  
8  
9  
10  
11  
12  
13  
14  
15  
16  
17  
18  
19  
20  
21  
22  
23  
24  
25  
26  
27  
28  
29  
30  
31  
32  
33  
34  
35  
36  
37  
38  
39  
40  
41  
42  
43  
44  
45  
46  
47  
48  
49  
50  
51  
52  
53  
54  
55  
56  
57  
58  
59  
60
32. Appel LJ, Moore TJ, Obarzanek E, et al. A clinical trial of the effects of dietary patterns on blood pressure. *New England Journal of Medicine* 1997;336(16):1117-24.
  33. Xu J, Long S. Confidence intervals for predicted outcomes in regression models for categorical outcomes. *The Stata Journal* 2005;5(4):537-59.
  34. Cleves M, Gould W, Gutierrez RG, et al. An Introduction to Survival Analysis Using Stata, Third Edition College Station, TX: Stata Press 2010.
  35. Miller PE, Lesko SM, Muscat JE, et al. Dietary patterns and colorectal adenoma and cancer risk: a review of the epidemiological evidence. *Nutr Cancer* 2010;62(4):413-24. doi: 10.1080/01635580903407114
  36. Miller PE, Cross AJ, Subar AF, et al. Comparison of 4 established DASH diet indexes: examining associations of index scores and colorectal cancer. *Am J Clin Nutr* 2013;98(3):794-803. doi: 10.3945/ajcn.113.063602
  37. Sandhu MS, Dunger DB, Giovannucci EL. Insulin, Insulin-Like Growth Factor-I (IGF-I), IGF Binding Proteins, Their Biologic Interactions, and Colorectal Cancer. *Journal of the National Cancer Institute* 2002;94(13):972-80.
  38. Pereira MA, Jacobs Jr DR, Van Horn L, et al. Dairy consumption, obesity, and the insulin resistance syndrome in young adults: the CARDIA Study. *Jama* 2002;287(16):2081-89.
  39. Jacobs ET, Thompson PA, Martinez ME. Diet, gender, and colorectal neoplasia. *Journal of clinical gastroenterology* 2007;41(8):731-46. doi: 10.1097/MCG.0b013e3180338e56
  40. Grodstein F, Newcomb PA, Stampfer MJ. Postmenopausal hormone therapy and the risk of colorectal cancer: a review and meta-analysis. *Am J Med* 1999;106(5):574-82.
  41. Morch LS, Lidegaard O, Keiding N, et al. The influence of hormone therapies on colon and rectal cancer. *Eur J Epidemiol* 2016;31(5):481-9. doi: 10.1007/s10654-016-0116-z
  42. Dai Z, Xu Y-C, Niu L. Obesity and colorectal cancer risk: a meta-analysis of cohort studies. *World Journal of Gastroenterology* 2007;13(31):4199.
  43. David LA, Maurice CF, Carmody RN, et al. Diet rapidly and reproducibly alters the human gut microbiome. *Nature* 2014;505(7484):559-63. doi: 10.1038/nature12820 <http://www.nature.com/nature/journal/v505/n7484/abs/nature12820.html#supplementary-information>
  44. Turnbaugh PJ, Hamady M, Yatsunencko T, et al. A core gut microbiome in obese and lean twins. *Nature* 2009;457(7228):480-84. doi: [http://www.nature.com/nature/journal/v457/n7228/supinfo/nature07540\\_S1.html](http://www.nature.com/nature/journal/v457/n7228/supinfo/nature07540_S1.html)
  45. Subar AF, Kipnis V, Troiano RP, et al. Using intake biomarkers to evaluate the extent of dietary misreporting in a large sample of adults: the OPEN study. *Am J Epidemiol* 2003;158(1):1-13.
  46. Kipnis V, Subar AF, Midthune D, et al. Structure of dietary measurement error: results of the OPEN biomarker study. *American Journal of Epidemiology* 2003;158(1):14-21.
  47. Ward E, Jemal A, Cokkinides V, et al. Cancer disparities by race/ethnicity and socioeconomic status. *CA Cancer J Clin* 2004;54(2):78-93.
  48. Irby K, Anderson WF, Henson DE, et al. Emerging and widening colorectal carcinoma disparities between Blacks and Whites in the United States (1975-2002). *Cancer Epidemiol Biomarkers Prev* 2006;15(4):792-7. doi: 10.1158/1055-9965.EPI-05-0879
  49. Wang DD, Leung CW, Li Y, et al. Trends in dietary quality among adults in the united states, 1999 through 2010. *JAMA Internal Medicine* 2014;174(10):1587-95. doi: 10.1001/jamainternmed.2014.3422
  50. Krebs-Smith SM, Guenther PM, Subar AF, et al. Americans Do Not Meet Federal Dietary Recommendations. *The Journal of Nutrition* 2010;140(10):1832-38. doi: 10.3945/jn.110.124826

## STROBE Statement—checklist of items that should be included in reports of observational studies

|                              | Item No | Recommendation                                                                                                                                                                                                                                                                                                                                                                                                                                                                                                                                                                                                                                                                                                                    |
|------------------------------|---------|-----------------------------------------------------------------------------------------------------------------------------------------------------------------------------------------------------------------------------------------------------------------------------------------------------------------------------------------------------------------------------------------------------------------------------------------------------------------------------------------------------------------------------------------------------------------------------------------------------------------------------------------------------------------------------------------------------------------------------------|
| <b>Title and abstract</b>    | 1       | (a) Indicate the study's design with a commonly used term in the title or the abstract <u><a href="#">see pg. 1</a></u><br>(b) Provide in the abstract an informative and balanced summary of what was done and what was found <u><a href="#">see pg. 2</a></u>                                                                                                                                                                                                                                                                                                                                                                                                                                                                   |
| <b>Introduction</b>          |         |                                                                                                                                                                                                                                                                                                                                                                                                                                                                                                                                                                                                                                                                                                                                   |
| Background/rationale         | 2       | Explain the scientific background and rationale for the investigation being reported <u><a href="#">see pgs. 4-5</a></u>                                                                                                                                                                                                                                                                                                                                                                                                                                                                                                                                                                                                          |
| Objectives                   | 3       | State specific objectives, including any prespecified hypotheses <u><a href="#">see pgs. 4-5</a></u>                                                                                                                                                                                                                                                                                                                                                                                                                                                                                                                                                                                                                              |
| <b>Methods</b>               |         |                                                                                                                                                                                                                                                                                                                                                                                                                                                                                                                                                                                                                                                                                                                                   |
| Study design                 | 4       | Present key elements of study design early in the paper <u><a href="#">see pg. 5</a></u>                                                                                                                                                                                                                                                                                                                                                                                                                                                                                                                                                                                                                                          |
| Setting                      | 5       | Describe the setting, locations, and relevant dates, including periods of recruitment, exposure, follow-up, and data collection                                                                                                                                                                                                                                                                                                                                                                                                                                                                                                                                                                                                   |
| Participants                 | 6       | (a) <i>Cohort study</i> —Give the eligibility criteria, and the sources and methods of selection of participants. Describe methods of follow-up<br><i>Case-control study</i> —Give the eligibility criteria, and the sources and methods of case ascertainment and control selection. Give the rationale for the choice of cases and controls<br><i>Cross-sectional study</i> —Give the eligibility criteria, and the sources and methods of selection of participants <u><a href="#">see pg. 5</a></u><br>(b) <i>Cohort study</i> —For matched studies, give matching criteria and number of exposed and unexposed<br><i>Case-control study</i> —For matched studies, give matching criteria and the number of controls per case |
| Variables                    | 7       | Clearly define all outcomes, exposures, predictors, potential confounders, and effect modifiers. Give diagnostic criteria, if applicable <u><a href="#">see pgs. 6-8</a></u>                                                                                                                                                                                                                                                                                                                                                                                                                                                                                                                                                      |
| Data sources/<br>measurement | 8*      | For each variable of interest, give sources of data and details of methods of assessment (measurement). Describe comparability of assessment methods if there is more than one group                                                                                                                                                                                                                                                                                                                                                                                                                                                                                                                                              |
| Bias                         | 9       | Describe any efforts to address potential sources of bias                                                                                                                                                                                                                                                                                                                                                                                                                                                                                                                                                                                                                                                                         |
| Study size                   | 10      | Explain how the study size was arrived at                                                                                                                                                                                                                                                                                                                                                                                                                                                                                                                                                                                                                                                                                         |
| Quantitative variables       | 11      | Explain how quantitative variables were handled in the analyses. If applicable, describe which groupings were chosen and why                                                                                                                                                                                                                                                                                                                                                                                                                                                                                                                                                                                                      |
| Statistical methods          | 12      | (a) Describe all statistical methods, including those used to control for confounding<br>(b) Describe any methods used to examine subgroups and interactions<br>(c) Explain how missing data were addressed<br>(d) <i>Cohort study</i> —If applicable, explain how loss to follow-up was addressed<br><i>Case-control study</i> —If applicable, explain how matching of cases and controls was addressed<br><i>Cross-sectional study</i> —If applicable, describe analytical methods taking account of sampling strategy <u><a href="#">see pgs. 8-9</a></u><br>(e) Describe any sensitivity analyses                                                                                                                             |

Continued on next page

**Results**

|                  |     |                                                                                                                                                                                                                                                                                                                                                                                                                                     |
|------------------|-----|-------------------------------------------------------------------------------------------------------------------------------------------------------------------------------------------------------------------------------------------------------------------------------------------------------------------------------------------------------------------------------------------------------------------------------------|
| Participants     | 13* | (a) Report numbers of individuals at each stage of study—eg numbers potentially eligible, examined for eligibility, confirmed eligible, included in the study, completing follow-up, and analysed <u>see pg. 8</u><br>(b) Give reasons for non-participation at each stage<br>(c) Consider use of a flow diagram                                                                                                                    |
| Descriptive data | 14* | (a) Give characteristics of study participants (eg demographic, clinical, social) and information on exposures and potential confounders <u>see pgs. 9-11</u><br>(b) Indicate number of participants with missing data for each variable of interest <u>see pg. 8</u><br>(c) <i>Cohort study</i> —Summarise follow-up time (eg, average and total amount)                                                                           |
| Outcome data     | 15* | <i>Cohort study</i> —Report numbers of outcome events or summary measures over time<br><i>Case-control study</i> —Report numbers in each exposure category, or summary measures of exposure<br><i>Cross-sectional study</i> —Report numbers of outcome events or summary measures <u>see pg. 6</u>                                                                                                                                  |
| Main results     | 16  | (a) Give unadjusted estimates and, if applicable, confounder-adjusted estimates and their precision (eg, 95% confidence interval). Make clear which confounders were adjusted for and why they were included <u>see pgs. 11-15</u><br>(b) Report category boundaries when continuous variables were categorized<br>(c) If relevant, consider translating estimates of relative risk into absolute risk for a meaningful time period |
| Other analyses   | 17  | Report other analyses done—eg analyses of subgroups and interactions, and sensitivity analyses                                                                                                                                                                                                                                                                                                                                      |

**Discussion**

|                  |    |                                                                                                                                                                                                  |
|------------------|----|--------------------------------------------------------------------------------------------------------------------------------------------------------------------------------------------------|
| Key results      | 18 | Summarise key results with reference to study objectives <u>see pgs. 16-19</u>                                                                                                                   |
| Limitations      | 19 | Discuss limitations of the study, taking into account sources of potential bias or imprecision. Discuss both direction and magnitude of any potential bias <u>see pg. 18</u>                     |
| Interpretation   | 20 | Give a cautious overall interpretation of results considering objectives, limitations, multiplicity of analyses, results from similar studies, and other relevant evidence <u>see pgs. 16-18</u> |
| Generalisability | 21 | Discuss the generalisability (external validity) of the study results <u>see pgs. 16-18</u>                                                                                                      |

**Other information**

|         |    |                                                                                                                                                                                     |
|---------|----|-------------------------------------------------------------------------------------------------------------------------------------------------------------------------------------|
| Funding | 22 | Give the source of funding and the role of the funders for the present study and, if applicable, for the original study on which the present article is based <u>see pgs. 19-20</u> |
|---------|----|-------------------------------------------------------------------------------------------------------------------------------------------------------------------------------------|

\*Give information separately for cases and controls in case-control studies and, if applicable, for exposed and unexposed groups in cohort and cross-sectional studies.

**Note:** An Explanation and Elaboration article discusses each checklist item and gives methodological background and published examples of transparent reporting. The STROBE checklist is best used in conjunction with this article (freely available on the Web sites of PLoS Medicine at <http://www.plosmedicine.org/>, Annals of Internal Medicine at <http://www.annals.org/>, and Epidemiology at <http://www.epidem.com/>). Information on the STROBE Initiative is available at [www.strobe-statement.org](http://www.strobe-statement.org).

# BMJ Open

## The Association of Dietary Quality with Colorectal Cancer among Normal Weight, Overweight, and Obese Men and Women: A Prospective Longitudinal Study in the United States

|                                 |                                                                                                                                                                                                                                                                                                                                                                                                                                                                                                                                                                                                                                                                                    |
|---------------------------------|------------------------------------------------------------------------------------------------------------------------------------------------------------------------------------------------------------------------------------------------------------------------------------------------------------------------------------------------------------------------------------------------------------------------------------------------------------------------------------------------------------------------------------------------------------------------------------------------------------------------------------------------------------------------------------|
| Journal:                        | <i>BMJ Open</i>                                                                                                                                                                                                                                                                                                                                                                                                                                                                                                                                                                                                                                                                    |
| Manuscript ID                   | bmjopen-2016-015619.R3                                                                                                                                                                                                                                                                                                                                                                                                                                                                                                                                                                                                                                                             |
| Article Type:                   | Research                                                                                                                                                                                                                                                                                                                                                                                                                                                                                                                                                                                                                                                                           |
| Date Submitted by the Author:   | 18-May-2017                                                                                                                                                                                                                                                                                                                                                                                                                                                                                                                                                                                                                                                                        |
| Complete List of Authors:       | Torres Stone, Rosalie; Clark University, Sociology; University of Massachusetts Medical School, Psychiatry<br>Waring, Molly; University of Massachusetts Medical School, Department of Quantitative Health Sciences<br>Cutrona, Sarah; University of Massachusetts Medical School, Department of Medicine<br>Kiefe, Catarina; UMass Medical School, Quantitative Health Sciences<br>Allison, Jeroan; University of Massachusetts Worcester, Department of Quantitative Health Sciences<br>Doubeni, Chyke A; University of Pennsylvania Perelman School of Medicine, Department of Family Medicine and Community Health, and the Center for Clinical Epidemiology and Biostatistics |
| <b>Primary Subject Heading</b>: | Oncology                                                                                                                                                                                                                                                                                                                                                                                                                                                                                                                                                                                                                                                                           |
| Secondary Subject Heading:      | Gastroenterology and hepatology, Epidemiology, Oncology, Public health                                                                                                                                                                                                                                                                                                                                                                                                                                                                                                                                                                                                             |
| Keywords:                       | EPIDEMIOLOGY, Gastroenterology < INTERNAL MEDICINE, NUTRITION & DIETETICS                                                                                                                                                                                                                                                                                                                                                                                                                                                                                                                                                                                                          |
|                                 |                                                                                                                                                                                                                                                                                                                                                                                                                                                                                                                                                                                                                                                                                    |

SCHOLARONE™  
Manuscripts

1  
2  
3  
4  
5  
6  
7  
8  
9 **Title: The Association of Dietary Quality with Colorectal Cancer among Normal Weight,**  
10 **Overweight, and Obese Men and Women:**  
11 **A Prospective Longitudinal Study in the United States**  
12

13  
14  
15  
16 Rosalie A. Torres Stone,<sup>1,2</sup> Molly E. Waring,<sup>3</sup> Sarah L. Cutrona,<sup>4</sup>  
17 Catarina I. Kiefe,<sup>3</sup> Jeroan Allison,<sup>3</sup> Chyke A. Doubeni<sup>5</sup>  
18  
19

20 <sup>1</sup>Clark University, Sociology Department, Worcester, Ma 01655 USA; <sup>2</sup>Systems and  
21 Psychosocial Advances Research Center (SPARC), Department of Psychiatry, University of  
22 Massachusetts Medical School, 222 Maple Avenue, Shrewsbury, MA 01545 USA, <sup>3</sup>Department  
23 of Quantitative Health Sciences, University of Massachusetts Medical School, Worcester, MA  
24 01605 USA; <sup>4</sup>Department of Medicine, University of Massachusetts Medical School, Worcester,  
25 MA 01605 USA <sup>5</sup>Department of Family Medicine and Community Health, and the Center for  
26 Clinical Epidemiology and Biostatistics, Perelman School of Medicine, University of  
27 Pennsylvania, Philadelphia, PA USA 19104  
28  
29  
30  
31

32  
33 **Author Note**  
34

35 Correspondence concerning this article should be addressed to Rosalie A. Torres Stone, 950  
36 Main Street, Clark University, Sociology Department, Worcester MA 01655, USA. E-mail:  
37 [rtorresstone@clarku.edu](mailto:rtorresstone@clarku.edu); Phone: 508-793-7376; Fax: 508-793-8854  
38  
39

40  
41 **Key Words:** colorectal cancer, diet, food, and nutrition, body mass index  
42  
43

44 **Manuscript Word Count: 3,376**  
45  
46  
47  
48  
49  
50  
51  
52  
53  
54  
55  
56  
57  
58  
59  
60

**ABSTRACT**

**Objective:** Lower body mass index (BMI) and higher dietary quality reduce the risk of colorectal cancer (CRC). A full understanding of how these associations vary by sex and weight is lacking.

**Methods:** We used data from the NIH-AARP Diet and Health Study for 398,458 persons who were 50-71 years old in 1995-1996 and followed through 2006. Exposures were dietary quality as reflected by the Mediterranean Diet, the Healthy Eating Index-2010, and the Dietary Approaches to Stop Hypertension score, stratified by BMI category. The outcome was CRC diagnosis from cancer registry data. Cox Regression models adjusted for disease risk factors.

**Results:** Over a mean duration of 123 months of follow-up, there were 6,515 new diagnoses of colorectal cancer (1,953 among the normal weight, 2,924 among the overweight, and 1,638 among the obese; 4,483 among men and 2,032 among women). For normal weight and overweight men, we found a strong dose-response pattern for the association of increasing quintile of dietary quality with decreasing risk of CRC; this pattern was observed for obese men as well, but less consistently across the three measures of dietary quality. The findings were of smaller magnitude and less consistent for women, but still suggesting associations of similar direction.

**Conclusion:** We observed that increased dietary quality was associated with lower risk of incident CRC up to 10 years later for men regardless of baseline weight category.

**Word Count: 228**

**Key Words:** colorectal cancer, diet, food, and nutrition, body mass index

**Strengths and Limitations of this Study:**

- To our knowledge, this is the first study to examine the potential benefits of healthy eating patterns in reducing colorectal cancer risk among men and women who are at normal weight, overweight and obese adults.
- Key strengths of this study include a large US national study of 398,458 middle aged and older adults with a prospective design, use of three indices of dietary patterns to assess association of high quality diet with outcomes rather than individual dietary components, careful ascertainment of dietary exposures using Food Frequency Questionnaire and cancer outcome, and the long follow-up interval.
- Our study has some limitations. We did not have information on family history of colorectal cancer, although the impact of family history is likely small given the age of the cohort. Dietary intake was self-reported and assessed using a single baseline measurement. Therefore, there is a potential for non-differential classification of dietary exposures and we could not examine changes in dietary intake over time. Our study population was relatively homogeneous with upper to middle class U.S. Americans in urban centers and over 90% of the sample was non-Hispanic white limiting generalizability to diverse population groups

**Contributors**

All authors read and approved the final version of the manuscript. Rosalie A. Torres Stone drafted the original manuscript and interpreted the findings, Chyke A. Doubeni conceived of the study and participated in the analyses and interpretation of the data. Jeroan Allison and Molly E. Waring conducted the analyses and interpreted the data. Sarah L. Cutrona and Catarina I. Kiefe contributed to the interpretation of the findings and critically revised the manuscript.

**Extra data is available:**

Extra data is available by submitting a proposal for each project/manuscript for review by the NIH AARP Steering Committee prior to accessing NIH AARP data and to developing an associated manuscript. A proposal must be submitted through the public website, NIH-AARP Diet & Health Study Tracking and Review System (STaRS, <https://www.nihaarpstars.com>).

**Conflict of Interest:**

None declared

**Data sharing:**

No additional data is available.

**Ethical approval:**

Not required. The data is de-identified. It was submitted as an amendment to the National Cancer Institute Special Studies Institutional Review Board (SSIRB) for review and was approved.

1  
2  
3  
4  
5  
6 **Word Count: 3,376**  
7

## 8 **INTRODUCTION**

9

10 Colorectal cancer (CRC) is the third leading cause of cancer-related deaths in the United  
11 States, resulting in an estimated more than 49,000 deaths in 2016.<sup>1</sup> Modifiable risk factors such  
12 as excess body weight and unhealthy behaviors (sedentary lifestyles, unhealthy dietary patterns,  
13 and smoking) increase the risk of CRC.<sup>2-15</sup> Most colorectal cancers are preventable through  
14 screening, detection and removal of precancerous lesions, or by engaging in healthful  
15 behaviors.<sup>16 17</sup> More specifically, it has been estimated that up to 70% of colorectal cancers  
16 could be avoided by risk factor modification.<sup>18</sup>  
17  
18  
19  
20  
21  
22  
23  
24  
25  
26

27 Obesity is a particularly concerning risk factor, as 37% of U.S. adults are obese.<sup>19</sup> A  
28 recent meta-analysis found a 30% higher risk of colon cancer in men and a 12% higher risk in  
29 women for every 5-kg/m<sup>2</sup> increase in body mass index (BMI).<sup>9</sup> Another meta-analysis found  
30 that obese adults were at roughly 20% greater risk of developing CRC compared with those of  
31 normal weight, and the risk of CRC increased 7% for every 2-kg/m<sup>2</sup> higher BMI.<sup>10</sup>  
32  
33  
34  
35  
36  
37  
38

39 Like obesity, diet is estimated to be one of the most important modifiable risk factors for  
40 CRC.<sup>13-15</sup> A dietary pattern that is rich in whole grains, vegetables, fruit, fish, legumes, and nuts  
41 and low in red and processed meat and alcohol has been linked to a substantial reduction in the  
42 risk of CRC.<sup>2-7 13 14</sup> Therefore, the World Health Organization recommends improving dietary  
43 quality by increasing consumption of fruit and vegetables, as well as legumes, whole grains, and  
44 nuts.<sup>20</sup> These recommendations are similar to those studied in the Dietary Approaches to Stop  
45 Hypertension trial,<sup>21 22</sup> and are also similar to recommendations found in the Mediterranean Diet  
46 examined in the Seven Countries Study.<sup>13 23</sup>  
47  
48  
49  
50  
51  
52  
53  
54  
55  
56  
57  
58  
59  
60



1  
2  
3  
4  
5  
6  
7  
8  
9  
10  
11  
12  
13  
14  
15  
16  
17  
18  
19  
20  
21  
22  
23  
24  
25  
26  
27  
28  
29  
30  
31  
32  
33  
34  
35  
36  
37  
38  
39  
40  
41  
42  
43  
44  
45  
46  
47  
48  
49  
50  
51  
52  
53  
54  
55  
56  
57  
58  
59  
60

Despite the potential benefits of a healthy BMI, many overweight and obese adults are not motivated or able to lose weight,<sup>24</sup> raising important questions. In the absence of weight loss, can a healthy diet still reduce CRC risk among overweight or obese adults? Likewise, because diet is emphasized as a means for weight loss, those who may be of normal weight may also lack the motivation to engage in health eating. These considerations raise unanswered questions about how the association of health eating patterns varies by weight categories. Therefore, our study examined the association between dietary quality and the risk of CRC and studied the variation in this association among normal weight, overweight, and obese adults. Because dietary patterns have been observed to be different for men and women analyses were stratified by gender.<sup>13</sup>

## METHODS

We used data from the National Institutes of Health-AARP (formerly the American Association of Retired Persons) Diet and Health Study. The NIH-AARP cohort was established in 1995-1996. AARP members who were contacted, returned questionnaires eliciting information on demographic and anthropometric characteristics, dietary intake, and health-related behaviors. The initial response rate was 18%. Eligible participants were 50 to 71 years old and resided in six U.S. states (California, Florida, Louisiana, New Jersey, North Carolina, and Pennsylvania) and two metropolitan areas (Atlanta, Georgia, and Detroit, Michigan).

## Outcome

The outcome for this analysis was diagnosis with incident adenocarcinoma of the colon/rectum ascertained from tumor registries through December 31, 2006. Cancer diagnosis in

1  
2  
3 participants was determined through probabilistic linkage with 8 state cancer registries. A  
4  
5 validation study found that this approach captured approximately 90% of all cancers.<sup>25</sup> Cancer  
6  
7 type and histologic characteristics were obtained from tumor registry data using International  
8  
9 Classification of Diseases – Oncology codes [8000, 8010, 8020, 8140-43, 8210-8211, 8221,  
10  
11 8255, 8261-3, 8480-1, 8490, 8510, and 8574].  
12  
13  
14

## 15 16 17 18 **Determinants**

19  
20 The main determinants for this analysis were three indices of dietary quality. At baseline  
21  
22 in 1995-1996, dietary intake during the past 12 months were assessed using a 124-item Food  
23  
24 Frequency Questionnaire. The NIH-AARP Food Frequency Questionnaire was previously  
25  
26 validated against 24-hour dietary recall in this cohort.<sup>25</sup> The Diet History Questionnaire has been  
27  
28 calibrated,<sup>25 26</sup> and further validation was performed by using two 24-h recalls within a subset of  
29  
30 the NIH-AARP Diet and Health Study.<sup>27</sup> By using the guidance-based food group equivalents  
31  
32 and other nutrient variables, we calculated component and index scores for the Healthy Eating  
33  
34 Index-2010 (HEI-2010),<sup>28</sup> the Mediterranean Diet Score,<sup>29</sup> and the Dietary Approaches to Stop  
35  
36 Hypertension (DASH),<sup>29</sup> according to algorithms described by Reedy et. al.<sup>30</sup>  
37  
38  
39  
40

41 The Mediterranean Diet Score ranges from 0 to 9 with higher scores corresponding to  
42  
43 diets more consistent with a Mediterranean diet.<sup>13 29 31</sup> One point each is given for: intake at or  
44  
45 greater than the sex-specific median for vegetables, fruit, nuts, legumes, fish, and whole grains;  
46  
47 and intake less than the sex-specific median for the monounsaturated: saturated fat ratio and red  
48  
49 and processed meat. Alcohol intake was scored by predetermined cut points for moderate intake  
50  
51 (men: 10-25 grams per day, women: 5-15 grams per day);<sup>13</sup> participants with moderate alcohol  
52  
53 intake received 1 point; other intakes (none, occasional, excessive) received 0 points.  
54  
55  
56  
57  
58  
59  
60

1  
2  
3 The Healthy Eating Index 2010 was developed for measuring dietary quality based on  
4 federal guidelines.<sup>28</sup> It awards points based on the adequacy of intake in nine categories (total  
5 vegetables, greens and beans, total fruit, whole fruit, whole grains, dairy, total protein foods, and  
6 seafood and plant proteins, fatty acids) and moderation of intake in three categories (sodium,  
7 refined grains, and empty calories). The Healthy Eating Index 2010 ranges from 0 to 100 with  
8 higher scores indicating better dietary quality.  
9  
10  
11  
12  
13  
14  
15  
16

17 DASH scores capture the diet tested in two DASH randomized controlled feeding trials,<sup>21</sup>  
18  
19  
20  
21  
22  
23  
24  
25  
26  
27  
28  
29  
30  
31  
32  
33  
34  
35  
36  
37  
38  
39  
40  
41  
42  
43  
44  
45  
46  
47  
48  
49  
50  
51  
52  
53  
54  
55  
56  
57  
58  
59  
60

<sup>32</sup> which examined the role of dietary patterns on blood pressure. Several versions of the DASH score exist, and we used the one most commonly found in the literature with U.S. populations.<sup>29</sup> To derive the score for the DASH Diet, intake was classified into quintiles for the following categories: fruits, vegetables, nuts and legumes, whole grains, low-fat dairy (higher intake indicated by higher quintile) and sodium, red and processed meats, and sweetened beverages (higher intake indicated by lower quintiles).<sup>30</sup> Based on these eight categories, the DASH Score ranged from 8 to 40, with higher scores indicating better dietary quality. DASH score were energy adjusted.

BMI was calculated from height and weight self-reported at baseline and categorized based on WHO criteria (normal: 18.5 to < 25 kg/m<sup>2</sup>, overweight: 25 to < 30 kg/m<sup>2</sup>, and obese: ≥ 30 kg/m<sup>2</sup>).

### Covariates

Characteristics self-reported at baseline included gender, age (50-54 years, 55-59 years, 60-64 years, 65-69 years, ≥ 70 years), educational level (high school or less, some college, or college degree), and race/ethnicity (Non-Hispanic White, Non-Hispanic Black, Hispanic,

1  
2  
3 Asian/Pacific Islander, American Indian/Alaskan Native). Other risk factors for CRC included:  
4  
5 smoking status (never smoked, former smoker, current smoker) and physical activity.  
6  
7

8 Participants were asked how often (in the previous 12 months) they engaged in physical activity  
9  
10 that lasted  $\geq 20$  minutes and caused increases in breathing or heart rate, or made the participant  
11  
12 sweat (never, rarely, 1-3 times per month, 1-2 times per week, 3-4 times per week,  $\geq 5$  more  
13  
14 times per week).  
15  
16

### 17 18 19 **Construction of the analytic sample**

20  
21 Of the 566,398 adults enrolled in the Diet-AARP Health Study, we excluded those who:  
22  
23 (1) completed questionnaires by proxy (n=15,760); (2) reported a history of end-stage renal  
24  
25 disease (1,299); (3) reported a history of cancer (8,902) or had registry confirmed prevalent  
26  
27 cancer (50,591); (4) reported a history of colonic or rectal polyps (57,179); (5) reported any first-  
28  
29 degree relatives with colon cancer (50,552); (6) were underweight (BMI  $< 18.5$  kg/m<sup>2</sup>) (5,912);  
30  
31 (7) were missing height or weight (13,944); or (8) reported implausibly high or low energy  
32  
33 intake based on Box-Cox transformation procedures designed for this dataset (n=3,534),<sup>27</sup>  
34  
35 resulting in an analytic sample of 398,458 adults.  
36  
37  
38  
39  
40  
41  
42

### 43 **Statistical Analysis**

44  
45 Univariate and summary characteristics were examined for all variables. Chi-square tests  
46  
47 were used to compare characteristics of participants who did and did not develop CRC over the  
48  
49 follow-up period for categorical variables, and the ANOVA was used for continuous variables.  
50  
51 Bivariate analyses also examined the association of each composite dietary measure and several  
52  
53 sets of food groups with the incidence of colorectal cancer. Linear regression models  
54  
55 characterized the association of participant characteristics with dietary adherence, treating the  
56  
57  
58  
59  
60

1  
2  
3 dietary measures as continuous. Based on known risk factors for CRC, covariates in all models  
4 included age, gender, race/ethnicity, education, smoking status, physical activity, and weight  
5 category. All models were also adjusted for energy intake.  
6  
7  
8  
9

10 Cox regression with duration of observation as the underlying time metric was used to  
11 calculate the hazard of developing CRC for a series of multivariable models. All models entered  
12 the dietary measures as quintiles and included adjustment for age, race/ethnicity, education,  
13 smoking, physical activity, and energy intake. The first set of models were based on stratified  
14 subsamples, being estimated separately for each gender-weight category and each dietary  
15 measure. A second set of Cox regression models was also created across all weight categories  
16 that included interaction terms for weight category and dietary adherence. From this second set  
17 of models, we predicted the probability of incident CRC at 10 years for each level of dietary  
18 quality and weight by raising the baseline hazard at 10 years to the power of the exponentiated  
19 linear predictor. Confidence intervals for the predicted probabilities were constructed with the  
20 delta method for approximation of complex variance estimates using Taylor linearization.<sup>33</sup>  
21  
22 Statistical “trend” tests were performed with the post-regression orthogonal polynomial contrast  
23 function of Stata 14.2 We found no evidence to suggest that proportional hazards assumptions  
24 were violated.<sup>34</sup> All analyses were performed with Stata 14.2 (StataCorp LP, College Station,  
25 TX).  
26  
27  
28  
29  
30  
31  
32  
33  
34  
35  
36  
37  
38  
39  
40  
41  
42  
43  
44  
45  
46  
47

## 48 RESULTS

49 At baseline, most participants were  $\geq 60$  years old (61%) and non-Hispanic white (91%);  
50 59% were men (Table 1).  
51  
52  
53  
54  
55  
56  
57  
58  
59  
60

**Table 1. Baseline Characteristics of Sample by Subsequent Diagnosis of Colorectal Cancer over 10 Years of Follow Up, NIH-AARP Diet and Health Study, 1995-2006**

|                                                                              | Overall | Did Not Develop Colorectal Cancer | Developed Colorectal Cancer | P-value |
|------------------------------------------------------------------------------|---------|-----------------------------------|-----------------------------|---------|
| N                                                                            | 398,458 | 391,943                           | 6,515                       |         |
| <b>Age (years), %</b>                                                        |         |                                   |                             |         |
| <55                                                                          | 17.28   | 17.42                             | 7.97                        | <0.001  |
| 55-59                                                                        | 22.04   | 22.15                             | 15.25                       |         |
| 60-64                                                                        | 26.29   | 26.28                             | 27.50                       |         |
| 65-69                                                                        | 30.33   | 30.12                             | 43.29                       |         |
| > 69                                                                         | 4.06    | 4.03                              | 5.99                        |         |
| <b>Gender</b>                                                                |         |                                   |                             |         |
| Female, %                                                                    | 40.60   | 40.76                             | 31.19                       | <0.001  |
| <b>Race/Ethnicity, %</b>                                                     |         |                                   |                             |         |
| Non-Hispanic White                                                           | 92.31   | 92.30                             | 92.84                       | 0.031   |
| Non-Hispanic-Black                                                           | 3.99    | 3.98                              | 4.16                        |         |
| Hispanic                                                                     | 1.99    | 2.00                              | 1.65                        |         |
| Asian/Pacific Islander                                                       | 1.42    | 1.43                              | 1.06                        |         |
| American Indian/ Alaska Native                                               | 0.29    | 0.29                              | 0.30                        |         |
| <b>Education, %</b>                                                          |         |                                   |                             |         |
| High School                                                                  | 26.38   | 26.31                             | 30.40                       | <0.001  |
| Some College                                                                 | 34.24   | 34.23                             | 34.86                       |         |
| College Degree                                                               | 39.38   | 39.45                             | 34.74                       |         |
| <b>Smoking Status, %</b>                                                     |         |                                   |                             |         |
| Never                                                                        | 37.00   | 37.11                             | 30.71                       | <0.001  |
| Former                                                                       | 50.60   | 50.50                             | 56.68                       |         |
| Current                                                                      | 12.40   | 12.39                             | 12.61                       |         |
| <b>Physical Activity (<math>\geq 20</math> minutes in past 12 months), %</b> |         |                                   |                             |         |
| Never                                                                        | 4.41    | 4.40                              | 5.32                        | <0.001  |
| Rarely                                                                       | 13.63   | 13.61                             | 15.03                       |         |
| 1-2 times/month                                                              | 13.74   | 13.74                             | 13.93                       |         |
| 1-2 times/week                                                               | 21.78   | 21.78                             | 21.51                       |         |
| 2-4 times/week                                                               | 26.99   | 27.01                             | 25.99                       |         |
| 3-5 times/week                                                               | 19.45   | 19.47                             | 18.23                       |         |
| <b>Baseline weight status, %</b>                                             |         |                                   |                             |         |
| Normal                                                                       | 35.09   | 35.18                             | 29.98                       | <0.001  |
| Overweight                                                                   | 42.81   | 42.77                             | 44.88                       |         |
| Obese                                                                        | 22.10   | 22.05                             | 25.14                       |         |
| <b>Dietary Scores (mean <math>\pm</math> sd)</b>                             |         |                                   |                             |         |
| Mediterranean Diet                                                           | 4.20    | 4.20                              | 4.06                        | <0.001  |
| Health Eating Index                                                          | 65.94   | 65.97                             | 64.42                       | <0.001  |
| Dietary Approaches to Stop HTN                                               | 23.85   | 23.85                             | 23.41                       | <0.001  |
| <b>Food Consumption</b>                                                      |         |                                   |                             |         |
| Whole grain oz./day                                                          | 0.997   | 0.998                             | 0.962                       | 0.001   |
| Dark green vegetable cups/day                                                | 0.242   | 0.242                             | 0.221                       | <0.001  |
| Dry beans and peas cups/day                                                  | 0.101   | 0.101                             | 0.100                       | 0.472   |
| Fruit (excluding juice) cups/day                                             | 1.264   | 1.265                             | 1.223                       | 0.003   |
| Chicken and poultry oz./day                                                  | 0.968   | 0.968                             | 0.932                       | 0.003   |
| Fish high in omega-3 oz./day                                                 | 0.169   | 0.169                             | 0.165                       | 0.051   |
| Franks, sausages, luncheon meats oz./day                                     | 0.564   | 0.563                             | 0.628                       | <0.001  |
| Beef, pork, veal, lamb oz./day                                               | 1.625   | 1.622                             | 1.774                       | 0.001   |

Weight status was based on BMI (normal weight: 18.5 to < 25 kg/m<sup>2</sup>; overweight: 25 to < 30 kg/m<sup>2</sup>; obese:  $\geq 30$  kg/m<sup>2</sup>). Food consumption based on equivalent values from MyPyramid Equivalents Database (MPED).

1  
2  
3 About 35% of the sample were normal weight, 43% were overweight, and 22% were obese.  
4  
5 Mean (sd; range) scores for dietary quality were 4.2 (1.8; 0 - 9) for the Mediterranean Diet, 65.9  
6  
7 (10.7; 18.2 - 98.4) for the Healthy Eating Index 2010, and 23.8 (4.1; 8 - 37) for the DASH Diet.  
8  
9

10 Over a mean follow-up duration of 123 months, 6,515 participants (1.64%) were  
11  
12 diagnosed with colorectal cancer. There were 6,515 new diagnoses of colorectal cancer (1,953  
13  
14 among the normal weight, 2,924 among the overweight, and 1,638 among the obese; 4,483  
15  
16 among men and 2,032 among women). Of all new diagnoses, 9.7% were Stage 0; 38.4% were  
17  
18 Stage 1; 14.0% were Stage 2; 22.7% were Stage 3; and 15.3% were Stage 4. The percent of  
19  
20 those diagnosed with colorectal cancer increased moving across BMI categories from normal to  
21  
22 overweight to obese (1.4%, 1.7%, 1.9%; p-value from log-rank trend test < 0.0001).  
23  
24  
25  
26

27 From bivariate analyses, older age, being male, having lower levels of physical activity,  
28  
29 smoking, having less education, and being overweight or obese were associated with an  
30  
31 increased risk of colorectal cancer ( $p < 0.001$ ) (Table 1). Compared to non-Hispanic whites, the  
32  
33 incidence of colorectal cancer was higher for non-Hispanic blacks and lower for Asians/Pacific  
34  
35 Islanders ( $p = 0.031$ ). Those who developed colorectal cancer had lower scores for dietary  
36  
37 adherence and consumed more red and processed meats, less whole grains, less dark green  
38  
39 vegetables, and less fruits.  
40  
41  
42

43 Based on an overall multivariable model for the entire study population, the hazard of  
44  
45 incident colorectal cancer diagnosis was 32% less for women compared to men (aOR; 95% CI:  
46  
47 0.68; 0.64 - 0.73). Compared to those who had normal weight, the hazard of incident colorectal  
48  
49 cancer diagnosis was 13% greater for those who were overweight (aOR; 95% CI: 1.13; 1.05 -  
50  
51 1.21) and 30% greater for those who were obese (aOR; 95% CI: 1.30; 1.20 - 1.40).  
52  
53  
54  
55  
56  
57  
58  
59  
60

1  
2  
3  
4  
5  
6  
7  
8  
9  
10  
11  
12  
13  
14  
15  
16  
17  
18  
19  
20  
21  
22  
23  
24  
25  
26  
27  
28  
29  
30  
31  
32  
33  
34  
35  
36  
37  
38  
39  
40  
41  
42  
43  
44  
45  
46  
47  
48  
49  
50  
51  
52  
53  
54  
55  
56  
57  
58  
59  
60

|                                                                           | Mediterranean Diet |               | Healthy Eating Index |               | DASH Diet |               |
|---------------------------------------------------------------------------|--------------------|---------------|----------------------|---------------|-----------|---------------|
|                                                                           | $\beta$            | 95% CI        | $\beta$              | 95% CI        | $\beta$   | 95% CI        |
| <b>Age (years)</b>                                                        |                    |               |                      |               |           |               |
| <55                                                                       | ---                | ---           | ---                  | ---           | ---       | ---           |
| 55-59                                                                     | 0.14               | 0.12 - 0.16   | 1.07                 | 0.96 - 1.18   | 0.36      | 0.31 - 0.40   |
| 60-64                                                                     | 0.24               | 0.22 - 0.25   | 1.85                 | 1.74 - 1.95   | 0.70      | 0.66 - 0.74   |
| 65-69                                                                     | 0.27               | 0.25 - 0.29   | 2.30                 | 2.19 - 2.40   | 1.00      | 0.96 - 1.05   |
| > 69                                                                      | 0.30               | 0.27 - 0.33   | 2.73                 | 2.53 - 2.92   | 1.31      | 1.23 - 1.38   |
| <b>Gender</b>                                                             |                    |               |                      |               |           |               |
| Male                                                                      | ---                | ---           | ---                  | ---           | ---       | ---           |
| Female                                                                    | 0.49               | 0.47 - 0.50   | 2.71                 | 2.64 - 2.79   | 0.77      | 0.74 - 0.80   |
| <b>Race/Ethnicity</b>                                                     |                    |               |                      |               |           |               |
| Non-Hispanic White                                                        | ---                | ---           | ---                  | ---           | ---       | ---           |
| Non-Hispanic-Black                                                        | 0.25               | 0.22 - 0.28   | 1.03                 | 0.86 - 1.22   | -0.34     | -0.41 - -0.27 |
| Hispanic                                                                  | 0.01               | -0.03 - 0.04  | 0.89                 | 0.63 - 1.15   | 0.04      | -0.06 - 0.14  |
| Asian/Pacific Islander                                                    | -0.08              | -0.12 - -0.03 | -0.57                | -0.87 - -0.27 | -0.57     | -0.68 - -0.45 |
| American Indian/ Alaska Native                                            | 0.00               | -0.11 - 0.11  | 0.31                 | -0.34 - 0.97  | -0.15     | -0.41 - 0.10  |
| <b>Education</b>                                                          |                    |               |                      |               |           |               |
| High School                                                               | ---                | ---           | ---                  | ---           | ---       | ---           |
| Some College                                                              | 0.25               | 0.24 - 0.27   | 1.80                 | 1.71 - 1.90   | 0.65      | 0.62 - 0.68   |
| College Degree                                                            | 0.55               | 0.54 - 0.57   | 3.53                 | 3.44 - 3.62   | 1.39      | 1.35 - 1.42   |
| <b>Smoking Status</b>                                                     |                    |               |                      |               |           |               |
| Never                                                                     | ---                | ---           | ---                  | ---           | ---       | ---           |
| Former                                                                    | 0.01               | -0.00 - 0.24  | -0.30                | -0.38 - -0.22 | -0.17     | -0.20 - -0.14 |
| Current                                                                   | -0.64              | -0.67 - 0.62  | -5.48                | -5.61 - -5.37 | -2.04     | -2.08 - -1.99 |
| <b>Physical Activity (<math>\geq 20</math> minutes in past 12 months)</b> |                    |               |                      |               |           |               |
| Never                                                                     | ---                | ---           | ---                  | ---           | ---       | ---           |
| Rarely                                                                    | 0.14               | 0.11 - 0.17   | 1.15                 | 0.96 - 1.35   | 0.13      | 0.05 - 0.20   |
| 1-2 times/month                                                           | 0.30               | 0.26 - 0.33   | 2.52                 | 2.32 - 2.71   | 0.44      | 0.37 - 0.52   |
| 1-2 times/week                                                            | 0.52               | 0.48 - 0.55   | 4.09                 | 3.90 - 4.28   | 0.94      | 0.87 - 1.01   |
| 2-4 times/week                                                            | 0.77               | 0.75 - 0.80   | 5.98                 | 5.79 - 6.16   | 1.74      | 1.76 - 1.81   |
| 3-5 times/week                                                            | 0.89               | 0.84 - 0.90   | 6.68                 | 6.49 - 6.87   | 2.24      | 2.17 - 2.31   |
| <b>Weight Category</b>                                                    |                    |               |                      |               |           |               |
| Normal                                                                    | ---                | ---           | ---                  | ---           | ---       | ---           |
| Overweight                                                                | -0.14              | -0.15 - -0.13 | -0.32                | -0.40 - -0.24 | -0.35     | -0.38 - -0.32 |
| Obese                                                                     | -0.24              | -0.25 - -0.22 | -0.56                | -0.66 - -0.47 | -0.50     | -0.53 - -0.46 |

From separate linear regression models for each dietary measure, with adjustment for energy intake. Weight categories were based on BMI (normal: 18.5 to < 25 kg/m<sup>2</sup>; overweight: 25 to < 30 kg/m<sup>2</sup>; obese:  $\geq 30$  kg/m<sup>2</sup>).

Results from the linear regression models predicting dietary adherence and the measures of dietary quality are presented in Table 2. We found “dose-response” associations for older age, higher education, and more frequent physical activity with better scores for each dietary measure. Women had better adherence for all three dietary patterns. Those who were non-Hispanic Black had better dietary scores for the Mediterranean Diet and the Health Eating Index,



but had lower DASH scores. Asians/Pacific Islanders had slightly lower scores on all three dietary measures. Separate models for men and women revealed no important differences (data not shown).

**Table 3a. Hazard Ratios and 95% Confidence Intervals for Incidence of Colorectal Cancer by Baseline Dietary Pattern and Weight Category, NIH-AARP Diet and Health Study for Men, 1996-2006 (n=182,762)**

| Dietary Score                                                                                                                                                                                                                                                                                                                                                                                                                                                                             | Normal Weight |             | Overweight   |             | Obese        |             |
|-------------------------------------------------------------------------------------------------------------------------------------------------------------------------------------------------------------------------------------------------------------------------------------------------------------------------------------------------------------------------------------------------------------------------------------------------------------------------------------------|---------------|-------------|--------------|-------------|--------------|-------------|
|                                                                                                                                                                                                                                                                                                                                                                                                                                                                                           | Hazard Ratio  | 95% CI      | Hazard Ratio | 95% CI      | Hazard Ratio | 95% CI      |
| <b>Mediterranean Diet Quintiles</b>                                                                                                                                                                                                                                                                                                                                                                                                                                                       |               |             |              |             |              |             |
| 1                                                                                                                                                                                                                                                                                                                                                                                                                                                                                         | ---           | ---         | ---          | ---         | ---          | ---         |
| 2                                                                                                                                                                                                                                                                                                                                                                                                                                                                                         | 0.79          | 0.66 - 0.96 | 0.83         | 0.73 - 0.95 | 0.97         | 0.80 - 1.17 |
| 3                                                                                                                                                                                                                                                                                                                                                                                                                                                                                         | 0.66          | 0.54 - 0.82 | 0.91         | 0.79 - 1.04 | 0.99         | 0.82 - 1.21 |
| 4                                                                                                                                                                                                                                                                                                                                                                                                                                                                                         | 0.67          | 0.54 - 0.84 | 0.77         | 0.66 - 0.91 | 0.78         | 0.62 - 1.00 |
| 5                                                                                                                                                                                                                                                                                                                                                                                                                                                                                         | 0.65          | 0.51 - 0.83 | 0.73         | 0.60 - 0.88 | 0.79         | 0.59 - 1.08 |
| p for trend                                                                                                                                                                                                                                                                                                                                                                                                                                                                               | 0.0004        |             | 0.0013       |             | 0.0508       |             |
| <b>Healthy Eating Index Quintiles</b>                                                                                                                                                                                                                                                                                                                                                                                                                                                     |               |             |              |             |              |             |
| 1                                                                                                                                                                                                                                                                                                                                                                                                                                                                                         | ---           | ---         | ---          | ---         | ---          | ---         |
| 2                                                                                                                                                                                                                                                                                                                                                                                                                                                                                         | 0.94          | 0.77 - 1.14 | 0.80         | 0.69 - 0.92 | 0.94         | 0.77 - 1.14 |
| 3                                                                                                                                                                                                                                                                                                                                                                                                                                                                                         | 0.83          | 0.67 - 1.03 | 0.73         | 0.63 - 0.85 | 0.82         | 0.67 - 1.02 |
| 4                                                                                                                                                                                                                                                                                                                                                                                                                                                                                         | 0.73          | 0.58 - 0.91 | 0.81         | 0.70 - 0.94 | 0.88         | 0.71 - 1.10 |
| 5                                                                                                                                                                                                                                                                                                                                                                                                                                                                                         | 0.67          | 0.54 - 0.84 | 0.63         | 0.53 - 0.74 | 0.76         | 0.60 - 0.99 |
| p for trend                                                                                                                                                                                                                                                                                                                                                                                                                                                                               | 0.0001        |             | <0.0001      |             | 0.0394       |             |
| <b>Dietary Approaches to Stop Hypertension Quintiles</b>                                                                                                                                                                                                                                                                                                                                                                                                                                  |               |             |              |             |              |             |
| 1                                                                                                                                                                                                                                                                                                                                                                                                                                                                                         | ---           | ---         | ---          | ---         | ---          | ---         |
| 2                                                                                                                                                                                                                                                                                                                                                                                                                                                                                         | 0.91          | 0.08 - 1.11 | 0.82         | 0.72 - 0.94 | 0.71         | 0.59 - 0.87 |
| 3                                                                                                                                                                                                                                                                                                                                                                                                                                                                                         | 0.79          | 0.64 - 0.99 | 0.73         | 0.63 - 0.85 | 0.78         | 0.63 - 0.96 |
| 4                                                                                                                                                                                                                                                                                                                                                                                                                                                                                         | 0.83          | 0.66 - 1.04 | 0.69         | 0.59 - 0.82 | 0.80         | 0.64 - 1.00 |
| 5                                                                                                                                                                                                                                                                                                                                                                                                                                                                                         | 0.67          | 0.54 - 0.84 | 0.70         | 0.60 - 0.82 | 0.75         | 0.60 - 0.94 |
| p for trend                                                                                                                                                                                                                                                                                                                                                                                                                                                                               | 0.0005        |             | <0.0001      |             | 0.0801       |             |
| Cox proportional hazard models adjusted for age, gender, race/ethnicity, education, smoking, physical activity, and energy intake. Separate models were developed for each dietary pattern and weight category. Dietary categories (low, high) are based on tertiles of native score. The lowest tertile is the reference group. Weight categories were based on BMI (normal: 18.5 to < 25 kg/m <sup>2</sup> ; overweight: 25 to < 30 kg/m <sup>2</sup> ; obese: ≥30 kg/m <sup>2</sup> ). |               |             |              |             |              |             |

The first set of multivariable models were stratified by weight category and examined the association of incident CRC by quintile of dietary score. Based on these models, which included adjustment for age, gender, race/ethnicity, smoking, and physical activity, and energy intake, increasing dietary quality was consistently associated with decreasing hazard of incident CRC for men of normal weight or were overweight (Table 3a). For obese men, the same general patterns were apparent, but the statistical significance across quintiles of dietary quality was

more marginal than for the other two BMI categories. Smaller and more inconsistent associations, albeit generally in the same direction, were found for women of all three weight categories (Table 3b).

| <b>Table 3b. Hazard Ratios and 95% Confidence Intervals for Incidence of Colorectal Cancer by Baseline Dietary Pattern and Weight Category, NIH-AARP Diet and Health Study for Women, 1996-2006 (n=125,281)</b>                                                                                                                                                                                                                                 |               |             |              |             |              |             |
|-------------------------------------------------------------------------------------------------------------------------------------------------------------------------------------------------------------------------------------------------------------------------------------------------------------------------------------------------------------------------------------------------------------------------------------------------|---------------|-------------|--------------|-------------|--------------|-------------|
| Dietary Score                                                                                                                                                                                                                                                                                                                                                                                                                                   | Normal Weight |             | Overweight   |             | Obese        |             |
|                                                                                                                                                                                                                                                                                                                                                                                                                                                 | Hazard Ratio  | 95% CI      | Hazard Ratio | 95% CI      | Hazard Ratio | 95% CI      |
| <b>Mediterranean Diet Quintiles</b>                                                                                                                                                                                                                                                                                                                                                                                                             |               |             |              |             |              |             |
| 1                                                                                                                                                                                                                                                                                                                                                                                                                                               | ---           | ---         | ---          | ---         | ---          | ---         |
| 2                                                                                                                                                                                                                                                                                                                                                                                                                                               | 0.95          | 0.76 - 1.20 | 1.09         | 0.86 - 1.38 | 1.35         | 1.04 - 1.74 |
| 3                                                                                                                                                                                                                                                                                                                                                                                                                                               | 0.88          | 0.69 - 1.12 | 1.00         | 0.78 - 1.30 | 0.86         | 0.64 - 1.16 |
| 4                                                                                                                                                                                                                                                                                                                                                                                                                                               | 0.90          | 0.68 - 1.18 | 0.81         | 0.59 - 1.11 | 0.89         | 0.63 - 1.25 |
| 5                                                                                                                                                                                                                                                                                                                                                                                                                                               | 1.02          | 0.75 - 1.37 | 0.99         | 0.68 - 1.41 | 0.95         | 0.63 - 1.43 |
| p for trend                                                                                                                                                                                                                                                                                                                                                                                                                                     | 0.9384        |             | 0.4318       |             | 0.2633       |             |
| <b>Healthy Eating Index Quintiles</b>                                                                                                                                                                                                                                                                                                                                                                                                           |               |             |              |             |              |             |
| 1                                                                                                                                                                                                                                                                                                                                                                                                                                               | ---           | ---         | ---          | ---         | ---          | ---         |
| 2                                                                                                                                                                                                                                                                                                                                                                                                                                               | 0.77          | 0.58 - 1.01 | 0.87         | 0.65 - 1.16 | 0.85         | 0.63 - 1.15 |
| 3                                                                                                                                                                                                                                                                                                                                                                                                                                               | 0.71          | 0.54 - 0.94 | 0.94         | 0.71 - 1.25 | 0.90         | 0.67 - 1.21 |
| 4                                                                                                                                                                                                                                                                                                                                                                                                                                               | 0.71          | 0.54 - 0.93 | 0.73         | 0.55 - 0.98 | 0.82         | 0.60 - 1.12 |
| 5                                                                                                                                                                                                                                                                                                                                                                                                                                               | 0.83          | 0.64 - 1.08 | 0.64         | 0.47 - 0.86 | 0.71         | 0.51 - 0.99 |
| p for trend                                                                                                                                                                                                                                                                                                                                                                                                                                     | 0.1557        |             | 0.0018       |             | 0.0573       |             |
| <b>Dietary Approaches to Stop Hypertension Quintiles</b>                                                                                                                                                                                                                                                                                                                                                                                        |               |             |              |             |              |             |
| 1                                                                                                                                                                                                                                                                                                                                                                                                                                               | ---           | ---         | ---          | ---         | ---          | ---         |
| 2                                                                                                                                                                                                                                                                                                                                                                                                                                               | 0.86          | 0.68 - 1.09 | 0.86         | 0.67 - 1.10 | 1.00         | 0.77 - 1.30 |
| 3                                                                                                                                                                                                                                                                                                                                                                                                                                               | 0.70          | 0.53 - 0.93 | 0.92         | 0.70 - 1.20 | 0.78         | 0.57 - 1.06 |
| 4                                                                                                                                                                                                                                                                                                                                                                                                                                               | 0.86          | 0.66 - 1.13 | 0.74         | 0.54 - 1.00 | 0.72         | 0.51 - 1.00 |
| 5                                                                                                                                                                                                                                                                                                                                                                                                                                               | 0.73          | 0.56 - 0.95 | 0.83         | 0.62 - 1.11 | 0.73         | 0.52 - 1.02 |
| p for trend                                                                                                                                                                                                                                                                                                                                                                                                                                     | 0.0389        |             | 0.1256       |             | 0.0128       |             |
| Cox proportional hazard models adjusted for age, gender, race/ethnicity, education, smoking, physical activity, and energy intake. Separate models were developed for each dietary pattern and weight category. Dietary adherence categories are based on lowest and highest tertiles. Weight categories were based on BMI (normal: 18.5 to < 25 kg/m <sup>2</sup> ; overweight: 25 to < 30 kg/m <sup>2</sup> ; obese: ≥30 kg/m <sup>2</sup> ). |               |             |              |             |              |             |

Based on the multivariable model Cox regression models, we predicted the incidence of new colorectal cancer at 10 years separately for men (Table 4a) and women (Table 4b). We found almost no statistical significance for the interaction of dietary measures with weight category for both men and women, providing no basis for refuting the hypothesis that the association of diet with incidence CRC differs by weight category. As shown in Table 4a, we found statistically significant linear trends for men who were of normal weight and who were

overweight, suggesting a gradient affect for increasing dietary quality with decreasing incidence of colorectal cancer at 10 years. Likewise, among obese men we found generally similar trends, which were of more marginal statistical significance. Consistent with the previously described hazard ratios, the findings were also more mixed for women (Table 4b). For both men and women, the absolute predicted rates of colorectal cancer were consistently less than 2.5%.

| <b>Table 4a. Probability and 95% Confidence Interval of Colorectal Cancer at 10 Years by Baseline Dietary Pattern and Weight Category, NIH-AARP Diet and Health Study for Men, 1996-2006 (n=182,762)</b>                                                                                                                                                                                                                                                                                                                                                                                                                                                                                                                                                                                                                                                                                                                                                                                                                                                                                                                                                                                                                                                     |                    |               |                      |               |                                         |               |
|--------------------------------------------------------------------------------------------------------------------------------------------------------------------------------------------------------------------------------------------------------------------------------------------------------------------------------------------------------------------------------------------------------------------------------------------------------------------------------------------------------------------------------------------------------------------------------------------------------------------------------------------------------------------------------------------------------------------------------------------------------------------------------------------------------------------------------------------------------------------------------------------------------------------------------------------------------------------------------------------------------------------------------------------------------------------------------------------------------------------------------------------------------------------------------------------------------------------------------------------------------------|--------------------|---------------|----------------------|---------------|-----------------------------------------|---------------|
| Dietary Score                                                                                                                                                                                                                                                                                                                                                                                                                                                                                                                                                                                                                                                                                                                                                                                                                                                                                                                                                                                                                                                                                                                                                                                                                                                | Mediterranean Diet |               | Healthy Eating Index |               | Dietary Approaches to Stop Hypertension |               |
|                                                                                                                                                                                                                                                                                                                                                                                                                                                                                                                                                                                                                                                                                                                                                                                                                                                                                                                                                                                                                                                                                                                                                                                                                                                              | Probability        | 95% CI        | Probability          | 95% CI        | Probability                             | 95% CI        |
| <b>Normal Weight</b>                                                                                                                                                                                                                                                                                                                                                                                                                                                                                                                                                                                                                                                                                                                                                                                                                                                                                                                                                                                                                                                                                                                                                                                                                                         |                    |               |                      |               |                                         |               |
| Quintile 1                                                                                                                                                                                                                                                                                                                                                                                                                                                                                                                                                                                                                                                                                                                                                                                                                                                                                                                                                                                                                                                                                                                                                                                                                                                   | 0.019              | 0.011 - 0.028 | 0.019                | 0.011 - 0.028 | 0.019                                   | 0.010 - 0.027 |
| Quintile 2                                                                                                                                                                                                                                                                                                                                                                                                                                                                                                                                                                                                                                                                                                                                                                                                                                                                                                                                                                                                                                                                                                                                                                                                                                                   | 0.015              | 0.008 - 0.003 | 0.017                | 0.009 - 0.025 | 0.017                                   | 0.009 - 0.025 |
| Quintile 3                                                                                                                                                                                                                                                                                                                                                                                                                                                                                                                                                                                                                                                                                                                                                                                                                                                                                                                                                                                                                                                                                                                                                                                                                                                   | 0.013              | 0.007 - 0.019 | 0.015                | 0.008 - 0.022 | 0.015                                   | 0.007 - 0.022 |
| Quintile 4                                                                                                                                                                                                                                                                                                                                                                                                                                                                                                                                                                                                                                                                                                                                                                                                                                                                                                                                                                                                                                                                                                                                                                                                                                                   | 0.013              | 0.007 - 0.019 | 0.013                | 0.007 - 0.019 | 0.015                                   | 0.008 - 0.022 |
| Quintile 5                                                                                                                                                                                                                                                                                                                                                                                                                                                                                                                                                                                                                                                                                                                                                                                                                                                                                                                                                                                                                                                                                                                                                                                                                                                   | 0.012              | 0.006 - 0.019 | 0.012                | 0.006 - 0.018 | 0.012                                   | 0.006 - 0.018 |
| p-for-trend                                                                                                                                                                                                                                                                                                                                                                                                                                                                                                                                                                                                                                                                                                                                                                                                                                                                                                                                                                                                                                                                                                                                                                                                                                                  | 0.0002             |               | <0.0001              |               | 0.0001                                  |               |
| <b>Overweight</b>                                                                                                                                                                                                                                                                                                                                                                                                                                                                                                                                                                                                                                                                                                                                                                                                                                                                                                                                                                                                                                                                                                                                                                                                                                            |                    |               |                      |               |                                         |               |
| Quintile 1                                                                                                                                                                                                                                                                                                                                                                                                                                                                                                                                                                                                                                                                                                                                                                                                                                                                                                                                                                                                                                                                                                                                                                                                                                                   | 0.019              | 0.011 - 0.028 | 0.022                | 0.011 - 0.032 | 0.021                                   | 0.011 - 0.031 |
| Quintile 2                                                                                                                                                                                                                                                                                                                                                                                                                                                                                                                                                                                                                                                                                                                                                                                                                                                                                                                                                                                                                                                                                                                                                                                                                                                   | 0.016              | 0.009 - 0.024 | 0.017                | 0.009 - 0.025 | 0.018                                   | 0.010 - 0.026 |
| Quintile 3                                                                                                                                                                                                                                                                                                                                                                                                                                                                                                                                                                                                                                                                                                                                                                                                                                                                                                                                                                                                                                                                                                                                                                                                                                                   | 0.018              | 0.010 - 0.027 | 0.016                | 0.008 - 0.023 | 0.016                                   | 0.008 - 0.024 |
| Quintile 4                                                                                                                                                                                                                                                                                                                                                                                                                                                                                                                                                                                                                                                                                                                                                                                                                                                                                                                                                                                                                                                                                                                                                                                                                                                   | 0.016              | 0.009 - 0.023 | 0.018                | 0.009 - 0.026 | 0.016                                   | 0.008 - 0.023 |
| Quintile 5                                                                                                                                                                                                                                                                                                                                                                                                                                                                                                                                                                                                                                                                                                                                                                                                                                                                                                                                                                                                                                                                                                                                                                                                                                                   | 0.015              | 0.008 - 0.022 | 0.014                | 0.007 - 0.020 | 0.016                                   | 0.008 - 0.023 |
| p-for-trend                                                                                                                                                                                                                                                                                                                                                                                                                                                                                                                                                                                                                                                                                                                                                                                                                                                                                                                                                                                                                                                                                                                                                                                                                                                  | 0.0017             |               | < 0.0001             |               | <0.0001                                 |               |
| <b>Obese</b>                                                                                                                                                                                                                                                                                                                                                                                                                                                                                                                                                                                                                                                                                                                                                                                                                                                                                                                                                                                                                                                                                                                                                                                                                                                 |                    |               |                      |               |                                         |               |
| Quintile 1                                                                                                                                                                                                                                                                                                                                                                                                                                                                                                                                                                                                                                                                                                                                                                                                                                                                                                                                                                                                                                                                                                                                                                                                                                                   | 0.021              | 0.011 - 0.030 | 0.022                | 0.012 - 0.032 | 0.024                                   | 0.012 - 0.035 |
| Quintile 2                                                                                                                                                                                                                                                                                                                                                                                                                                                                                                                                                                                                                                                                                                                                                                                                                                                                                                                                                                                                                                                                                                                                                                                                                                                   | 0.020              | 0.011 - 0.030 | 0.021                | 0.011 - 0.031 | 0.017                                   | 0.009 - 0.026 |
| Quintile 3                                                                                                                                                                                                                                                                                                                                                                                                                                                                                                                                                                                                                                                                                                                                                                                                                                                                                                                                                                                                                                                                                                                                                                                                                                                   | 0.021              | 0.011 - 0.031 | 0.019                | 0.009 - 0.027 | 0.019                                   | 0.010 - 0.029 |
| Quintile 4                                                                                                                                                                                                                                                                                                                                                                                                                                                                                                                                                                                                                                                                                                                                                                                                                                                                                                                                                                                                                                                                                                                                                                                                                                                   | 0.017              | 0.009 - 0.026 | 0.020                | 0.011 - 0.029 | 0.020                                   | 0.010 - 0.030 |
| Quintile 5                                                                                                                                                                                                                                                                                                                                                                                                                                                                                                                                                                                                                                                                                                                                                                                                                                                                                                                                                                                                                                                                                                                                                                                                                                                   | 0.017              | 0.008 - 0.026 | 0.017                | 0.009 - 0.026 | 0.019                                   | 0.010 - 0.028 |
| p-for-trend                                                                                                                                                                                                                                                                                                                                                                                                                                                                                                                                                                                                                                                                                                                                                                                                                                                                                                                                                                                                                                                                                                                                                                                                                                                  | 0.0212             |               | 0.0304               |               | 0.0502                                  |               |
| <p>Probabilities are based on a Cox model that adjusts for age, gender, race/ethnicity, education, smoking, physical activity, and energy intake. Models include interaction terms for baseline dietary scores and weight category. Separate models were developed for each dietary pattern. Weight categories were based on BMI (normal: 18.5 to &lt; 25 kg/m<sup>2</sup>; overweight: 25 to &lt; 30 kg/m<sup>2</sup>; obese: ≥30 kg/m<sup>2</sup>).</p> <p>P-values for interaction terms for quintiles of Mediterranean Diet and weight category are: Q2-overweight, 0.626; Q2-obese 0.159; Q3-overweight, 0.008; Q3-obese, 0.006; Q4-overweight, 0.250; Q4-obese, 0.408; Q5-overweight, 0.367; Q5-obese, 0.366. P-values for interaction terms for quintiles of Healthy Eating Index and weight category are: Q2-overweight, 0.227; Q2-obese 0.961; Q3-overweight, 0.411; Q3-obese, 0.974; Q4-overweight, 0.304; Q4-obese, 0.164; Q5-overweight, 0.726; Q5-obese, 0.381. P-values for interaction terms for quintiles of Dietary Approaches to Stop Hypertension and weight category are: Q2-overweight, 0.486; Q2-obese 0.090; Q3-overweight, 0.733; Q3-obese, 0.974; Q4-overweight, 0.344; Q4-obese, 0.920; Q5-overweight, 0.482; Q5-obese, 0.411.</p> |                    |               |                      |               |                                         |               |
| <b>Table 4b. Probability and 95% Confidence Interval of Colorectal Cancer at 10 Years by Baseline Dietary Pattern and Weight Category, NIH-AARP Diet and Health Study for Women, 1996-2006 (n=125,281)</b>                                                                                                                                                                                                                                                                                                                                                                                                                                                                                                                                                                                                                                                                                                                                                                                                                                                                                                                                                                                                                                                   |                    |               |                      |               |                                         |               |

| Dietary Score                                                                                                                                                                                                                                                                                                                                                                                                                                                                                                                                                                                                                                                                                                                                                                                                                                                                                                                                                                                                                                                                                                                                                                                                                                                | Mediterranean Diet |               | Healthy Eating Index |               | Dietary Approaches to Stop Hypertension |               |
|--------------------------------------------------------------------------------------------------------------------------------------------------------------------------------------------------------------------------------------------------------------------------------------------------------------------------------------------------------------------------------------------------------------------------------------------------------------------------------------------------------------------------------------------------------------------------------------------------------------------------------------------------------------------------------------------------------------------------------------------------------------------------------------------------------------------------------------------------------------------------------------------------------------------------------------------------------------------------------------------------------------------------------------------------------------------------------------------------------------------------------------------------------------------------------------------------------------------------------------------------------------|--------------------|---------------|----------------------|---------------|-----------------------------------------|---------------|
|                                                                                                                                                                                                                                                                                                                                                                                                                                                                                                                                                                                                                                                                                                                                                                                                                                                                                                                                                                                                                                                                                                                                                                                                                                                              | Probability        | 95% CI        | Probability          | 95% CI        | Probability                             | 95% CI        |
| <b>Normal Weight</b>                                                                                                                                                                                                                                                                                                                                                                                                                                                                                                                                                                                                                                                                                                                                                                                                                                                                                                                                                                                                                                                                                                                                                                                                                                         |                    |               |                      |               |                                         |               |
| Quintile 1                                                                                                                                                                                                                                                                                                                                                                                                                                                                                                                                                                                                                                                                                                                                                                                                                                                                                                                                                                                                                                                                                                                                                                                                                                                   | 0.011              | 0.001 - 0.021 | 0.013                | 0.001 - 0.025 | 0.012                                   | 0.001 - 0.023 |
| Quintile 2                                                                                                                                                                                                                                                                                                                                                                                                                                                                                                                                                                                                                                                                                                                                                                                                                                                                                                                                                                                                                                                                                                                                                                                                                                                   | 0.010              | 0.001 - 0.020 | 0.010                | 0.000 - 0.019 | 0.011                                   | 0.001 - 0.021 |
| Quintile 3                                                                                                                                                                                                                                                                                                                                                                                                                                                                                                                                                                                                                                                                                                                                                                                                                                                                                                                                                                                                                                                                                                                                                                                                                                                   | 0.009              | 0.000 - 0.018 | 0.009                | 0.000 - 0.018 | 0.009                                   | 0.000 - 0.017 |
| Quintile 4                                                                                                                                                                                                                                                                                                                                                                                                                                                                                                                                                                                                                                                                                                                                                                                                                                                                                                                                                                                                                                                                                                                                                                                                                                                   | 0.010              | 0.000 - 0.019 | 0.009                | 0.000 - 0.018 | 0.011                                   | 0.001 - 0.021 |
| Quintile 5                                                                                                                                                                                                                                                                                                                                                                                                                                                                                                                                                                                                                                                                                                                                                                                                                                                                                                                                                                                                                                                                                                                                                                                                                                                   | 0.011              | 0.000 - 0.021 | 0.011                | 0.001 - 0.022 | 0.009                                   | 0.000 - 0.018 |
| p-for-trend                                                                                                                                                                                                                                                                                                                                                                                                                                                                                                                                                                                                                                                                                                                                                                                                                                                                                                                                                                                                                                                                                                                                                                                                                                                  | 0.9396             |               | 0.1547               |               | 0.0426                                  |               |
| <b>Overweight</b>                                                                                                                                                                                                                                                                                                                                                                                                                                                                                                                                                                                                                                                                                                                                                                                                                                                                                                                                                                                                                                                                                                                                                                                                                                            |                    |               |                      |               |                                         |               |
| Quintile 1                                                                                                                                                                                                                                                                                                                                                                                                                                                                                                                                                                                                                                                                                                                                                                                                                                                                                                                                                                                                                                                                                                                                                                                                                                                   | 0.012              | 0.001 - 0.024 | 0.014                | 0.001 - 0.028 | 0.013                                   | 0.001 - 0.026 |
| Quintile 2                                                                                                                                                                                                                                                                                                                                                                                                                                                                                                                                                                                                                                                                                                                                                                                                                                                                                                                                                                                                                                                                                                                                                                                                                                                   | 0.013              | 0.007 - 0.025 | 0.012                | 0.001 - 0.024 | 0.012                                   | 0.001 - 0.023 |
| Quintile 3                                                                                                                                                                                                                                                                                                                                                                                                                                                                                                                                                                                                                                                                                                                                                                                                                                                                                                                                                                                                                                                                                                                                                                                                                                                   | 0.012              | 0.001 - 0.023 | 0.014                | 0.001 - 0.026 | 0.012                                   | 0.001 - 0.024 |
| Quintile 4                                                                                                                                                                                                                                                                                                                                                                                                                                                                                                                                                                                                                                                                                                                                                                                                                                                                                                                                                                                                                                                                                                                                                                                                                                                   | 0.009              | 0.000 - 0.018 | 0.011                | 0.000 - 0.021 | 0.010                                   | 0.000 - 0.019 |
| Quintile 5                                                                                                                                                                                                                                                                                                                                                                                                                                                                                                                                                                                                                                                                                                                                                                                                                                                                                                                                                                                                                                                                                                                                                                                                                                                   | 0.011              | 0.000 - 0.022 | 0.010                | 0.000 - 0.019 | 0.011                                   | 0.000 - 0.022 |
| p-for-trend                                                                                                                                                                                                                                                                                                                                                                                                                                                                                                                                                                                                                                                                                                                                                                                                                                                                                                                                                                                                                                                                                                                                                                                                                                                  | 0.1391             |               | 0.0015               |               | 0.0242                                  |               |
| <b>Obese</b>                                                                                                                                                                                                                                                                                                                                                                                                                                                                                                                                                                                                                                                                                                                                                                                                                                                                                                                                                                                                                                                                                                                                                                                                                                                 |                    |               |                      |               |                                         |               |
| Quintile 1                                                                                                                                                                                                                                                                                                                                                                                                                                                                                                                                                                                                                                                                                                                                                                                                                                                                                                                                                                                                                                                                                                                                                                                                                                                   | 0.013              | 0.001 - 0.024 | 0.015                | 0.001 - 0.030 | 0.014                                   | 0.001 - 0.028 |
| Quintile 2                                                                                                                                                                                                                                                                                                                                                                                                                                                                                                                                                                                                                                                                                                                                                                                                                                                                                                                                                                                                                                                                                                                                                                                                                                                   | 0.018              | 0.001 - 0.034 | 0.013                | 0.001 - 0.026 | 0.015                                   | 0.001 - 0.030 |
| Quintile 3                                                                                                                                                                                                                                                                                                                                                                                                                                                                                                                                                                                                                                                                                                                                                                                                                                                                                                                                                                                                                                                                                                                                                                                                                                                   | 0.012              | 0.001 - 0.023 | 0.014                | 0.001 - 0.028 | 0.012                                   | 0.000 - 0.024 |
| Quintile 4                                                                                                                                                                                                                                                                                                                                                                                                                                                                                                                                                                                                                                                                                                                                                                                                                                                                                                                                                                                                                                                                                                                                                                                                                                                   | 0.013              | 0.000 - 0.025 | 0.013                | 0.001 - 0.026 | 0.012                                   | 0.000 - 0.023 |
| Quintile 5                                                                                                                                                                                                                                                                                                                                                                                                                                                                                                                                                                                                                                                                                                                                                                                                                                                                                                                                                                                                                                                                                                                                                                                                                                                   | 0.014              | 0.000 - 0.027 | 0.011                | 0.000 - 0.023 | 0.013                                   | 0.000 - 0.025 |
| p-for-trend                                                                                                                                                                                                                                                                                                                                                                                                                                                                                                                                                                                                                                                                                                                                                                                                                                                                                                                                                                                                                                                                                                                                                                                                                                                  | 0.5725             |               | 0.0370               |               | 0.0399                                  |               |
| <p>Probabilities are based on a Cox model that adjusts for age, gender, race/ethnicity, education, smoking, physical activity, and energy intake. Models include interaction terms for baseline dietary scores and weight category. Separate models were developed for each dietary pattern. Weight categories were based on BMI (normal: 18.5 to &lt; 25 kg/m<sup>2</sup>; overweight: 25 to &lt; 30 kg/m<sup>2</sup>; obese: ≥30 kg/m<sup>2</sup>).</p> <p>P-values for interaction terms for quintiles of Mediterranean Diet and weight category are: Q2-overweight, 0.524; Q2-obese 0.024; Q3-overweight, 0.651; Q3-obese, 0.826; Q4-overweight, 0.354; Q4-obese, 0.660; Q5-overweight, 0.547; Q5-obese, 0.881. P-values for interaction terms for quintiles of Healthy Eating Index and weight category are: Q2-overweight, 0.554; Q2-obese 0.664; Q3-overweight, 0.154; Q3-obese, 0.290; Q4-overweight, 0.880; Q4-obese, 0.542; Q5-overweight, 0.156; Q5-obese, 0.358. P-values for interaction terms for quintiles of Dietary Approaches to Stop Hypertension and weight category are: Q2-overweight, 0.902; Q2-obese 0.328; Q3-overweight, 0.254; Q3-obese, 0.530; Q4-overweight, 0.256; Q4-obese, 0.525; Q5-overweight, 0.866; Q5-obese, 0.714.</p> |                    |               |                      |               |                                         |               |

## DISCUSSION

In this large national study of nearly 400,000 of middle aged and older adults, we found that baseline high quality diets as measured by three diet quality indices (Mediterranean Diet Score, the Healthy Eating Index 2010, and the Dietary Approaches to Stop Hypertension Score) were each associated with lower risk of CRC over a subsequent 10-year period among men who were of normal weight and overweight in a generally consistent “dose-response” effect. Trends were less consistent and of smaller magnitude among men who were obese and women in all three weight categories.

Although previous studies have not examined differences according to baseline weight status, our findings are consistent with other studies demonstrating that higher dietary quality is associated with reduced risk of colorectal adenoma in general.<sup>13</sup> For example, a recent narrative review of publications using the Nurses’ Health Study (1976-2016) identified red and processed meat, alcohol, smoking and obesity as factors that increase the risk of CRC.<sup>15</sup> Likewise, an ecological study suggested that 76% of the inter-country variation in colorectal cancer incidence was explained by meat, fish, and olive oil intake, with olive oil intake being associated with reduced risk.<sup>2</sup>

A review of epidemiological studies investigating the associations between dietary patterns including the DASH, the Mediterranean Diet, and the Healthy Eating Index has also shown a consistently reduced risk of colorectal adenoma and cancer incidence of higher scores on all of the dietary indexes for men, but was less conclusive for women.<sup>13 35</sup> Another large prospective examination of four established DASH indexes found that greater compliance with the DASH dietary pattern was associated with a reduced risk of CRC for both men and women.<sup>36</sup> This consistency across the three dietary patterns is not surprising because each of these dietary

1  
2  
3 approaches is built on a similar foundation of fresh fruits and vegetables, whole grains, and low  
4  
5 saturated fat.  
6

7  
8 There are physiologic mechanisms through which diet may be associated with a reduced  
9  
10 risk of CRC and through which this association may differ for men and for women. For  
11  
12 example, studies focused on individual nutrients suggest that olive oil may exert a reduced risk  
13  
14 of CRC by influencing secondary bile acid patterns in the colon. This may in turn affect  
15  
16 polyamine metabolism in colonic enterocytes, reducing progression from normal mucosa to  
17  
18 adenoma and carcinoma.<sup>3</sup> Fiber intake may reduce the contact between carcinogens and the  
19  
20 lining of the colon/rectum and increase stool bulk, which dilutes fecal carcinogens and decreases  
21  
22 transit time.<sup>2,7</sup> Red and processed meat may exert a carcinogenic effect due to heme iron, N-nitro  
23  
24 compounds and heterocyclic amines generated during cooking at high temperatures as well as a  
25  
26 pro-neoplastic effect due to increased adiposity and insulin. Other studies suggest that dietary  
27  
28 patterns that include a high consumption of high saturated fatty acid intake may increase CRC  
29  
30 risk via their effects on serum insulin concentrations and on the bioavailability of insulin-like  
31  
32 growth factor-I (IGF-I).<sup>37</sup> Whole grain intake has been associated with decreased fasting insulin  
33  
34 level and improved insulin sensitivity.<sup>7,38</sup>  
35  
36  
37  
38  
39  
40

41 The differential response of dietary intake to risk of CRC incidence by sex in our study  
42  
43 could be explained by differences in the etiology of CRC between men and women.<sup>13</sup> Studies  
44  
45 have indicated that women are more likely to develop proximal CRC compared to men.<sup>39</sup>  
46  
47 Because proximal and distal CRC appear to arise from different pathways it is possible that the  
48  
49 response to dietary intake varies by proximal and distal location type.<sup>39</sup> Hormonal factors may  
50  
51 also be responsible for sex differences CRC etiology. Studies of postmenopausal hormone  
52  
53 therapy and colorectal cancer report a reduction in risk of colon cancer and a decrease in the risk  
54  
55  
56  
57  
58  
59  
60

1  
2  
3 of rectal cancer for postmenopausal women who had ever taken hormone therapy compared with  
4 women who never used hormones. The CRC risk reduction appears to be stronger for current and  
5 long-term hormone users.<sup>40 41</sup>  
6  
7

8  
9  
10 The association was of borderline significance and inconsistent across the three dietary  
11 measures for obese men and women. It is plausible that the beneficial effects of a healthy diet  
12 are attenuated by the inflammatory, hormonal, and other metabolic changes induced by obesity  
13 that promote colorectal carcinogenesis.<sup>42</sup> For example, the gut microbiome that provides  
14 important metabolic capabilities, is responsive to alterations of diet,<sup>43</sup> and has been shown in  
15 obese people to be different from, and less diverse than, those of the non-obese.<sup>44</sup>  
16  
17

18  
19  
20 Our study has some limitations. We did not have information on family history of  
21 colorectal cancer, although the impact of family history is likely small given the age of the  
22 cohort.<sup>45</sup> Medical co-morbidity was not included as a covariate in the multivariable models. Our  
23 study population was relatively homogenous with upper-to-middle class Americans in urban  
24 centers: non-whites comprised a relatively small proportion of our sample. Dietary intake was  
25 self-reported and assessed using a single baseline Food Frequency Questionnaire, thus, there is  
26 potential for non-differential measurement error.<sup>46</sup> With only a single measure, we could not  
27 examine changes in dietary intake over time. It is possible that the observed differences between  
28 men and women are artifacts from how the data were collected. For example, it has been  
29 suggested that differential bias could be introduced by the way women and men complete the  
30 Food Frequency Questionnaire.<sup>46 47</sup> Women in the AARP (as a group) may have more variation  
31 in diet patterns and perception of dietary intake (and weight status) over time than men.<sup>25</sup>  
32  
33 Additionally, there is evidence that difference in dietary patterns may vary for men and women  
34 who respond in a similar manner to the same survey.<sup>13</sup> Over 90% of the sample was non-  
35  
36  
37  
38  
39  
40  
41  
42  
43  
44  
45  
46  
47  
48  
49  
50  
51  
52  
53  
54  
55  
56  
57  
58  
59  
60

1  
2  
3 Hispanic white. The research consistently shows that incident rates of CRC and obesity  
4 prevalence are higher in African Americans compared to whites.<sup>48 49</sup> Although our sample was  
5 drawn from a nationally representative sample, it is not representative of adults in that age group  
6 because individuals from low socioeconomic status were not included. This is important because  
7 despite steady improvements in healthy eating patterns among US adults the overall dietary  
8 quality remains poor particularly in low income populations.<sup>50 51</sup>  
9  
10  
11  
12  
13  
14  
15  
16

17 This is a large U.S. national study with a prospective design of 398,458 middle aged and  
18 older adults with careful ascertainment of cancer outcome and detailed exposure measure using a  
19 well-validated Food Frequency Questionnaire. We used three indices of dietary patterns to  
20 assess association of high quality diet with outcomes rather than individuals dietary components.  
21 The cohort was followed up over a subsequent 10-year period.  
22  
23  
24  
25  
26  
27  
28  
29  
30

## 31 CONCLUSION

32 This longitudinal national study of 398,458 middle aged and older adults found that  
33 among normal-weight and overweight men, CRC risk was 25-30% lower with high adherence to  
34 each dietary measure. Health benefits of consuming a high-quality diet extend to normal weight  
35 men, offering potential insights about approaches to cancer prevention. Additional research is  
36 needed to understand the weaker and less consistent results for women.  
37  
38  
39  
40  
41  
42  
43  
44  
45  
46  
47  
48  
49  
50  
51  
52  
53  
54  
55  
56  
57  
58  
59  
60



1  
2  
3 **Acknowledgments:** This research was supported [in part] by the Intramural Research Program  
4 of the NIH, National Cancer Institute. Cancer incidence data from the Atlanta metropolitan area  
5 were collected by the Georgia Center for Cancer Statistics, Department of Epidemiology, Rollins  
6 School of Public Health, Emory University, Atlanta, Georgia. Cancer incidence data from  
7 California were collected by the California Cancer Registry, California Department of Public  
8 Health's Cancer Surveillance and Research Branch, Sacramento, California. Cancer incidence  
9 data from the Detroit metropolitan area were collected by the Michigan Cancer Surveillance  
10 Program, Community Health Administration, Lansing, Michigan. The Florida cancer incidence  
11 data used in this report were collected by the Florida Cancer Data System (Miami, Florida) under  
12 contract with the Florida Department of Health, Tallahassee, Florida. The views expressed herein  
13 are solely those of the authors and do not necessarily reflect those of the FCDC or FDOH.  
14 Cancer incidence data from Louisiana were collected by the Louisiana Tumor Registry,  
15 Louisiana State University Health Sciences Center School of Public Health, New Orleans,  
16 Louisiana. Cancer incidence data from New Jersey were collected by the New Jersey State  
17 Cancer Registry, The Rutgers Cancer Institute of New Jersey, New Brunswick, New Jersey.  
18 Cancer incidence data from North Carolina were collected by the North Carolina Central Cancer  
19 Registry, Raleigh, North Carolina. Cancer incidence data from Pennsylvania were supplied by  
20 the Division of Health Statistics and Research, Pennsylvania Department of Health, Harrisburg,  
21 Pennsylvania. The Pennsylvania Department of Health specifically disclaims responsibility for  
22 any analyses, interpretations or conclusions. Cancer incidence data from Arizona were collected  
23 by the Arizona Cancer Registry, Division of Public Health Services, Arizona Department of  
24 Health Services, Phoenix, Arizona. Cancer incidence data from Texas were collected by the  
25 Texas Cancer Registry, Cancer Epidemiology and Surveillance Branch, Texas Department of  
26 State Health Services, Austin, Texas. Cancer incidence data from Nevada were collected by the  
27 Nevada Central Cancer Registry, Division of Public and Behavioral Health, State of Nevada  
28 Department of Health and Human Services, Carson City, Nevada.

29  
30 We are indebted to the participants in the NIH-AARP Diet and Health Study for their  
31 outstanding cooperation. We also thank Sigurd Hermansen and Kerry Grace Morrissey from  
32 Westat for study outcomes ascertainment and management and Leslie Carroll at Information  
33 Management Services for data support and analysis.

34  
35 The authors want to gratefully acknowledge and thank Drs. Rachel Ballard-Barbash and Jill  
36 Reedy for their invaluable feedback on the manuscript.

37  
38 **Competing Interests:** None declared

39  
40 **Funding Support:** The content of this manuscript was developed with funding from the  
41 National Cancer Institute at the National Institutes of Health (U01-CA1517361, PI: Doubeni).  
42 The contents of this manuscript do not necessarily reflect the views of the funding agencies and  
43 you should not assume endorsement by the Federal Government.

44  
45 Research reported in this publication was supported by the National Institute of Minority Health  
46 and Health Disparities of the National Institutes of Health under Award Number P60MD006912  
47 (PI: Allison). The content is solely the responsibility of the authors and does not necessarily  
48 represent the official views of the National Institutes of Health.

1  
2  
3 Partial support for Dr. Waring provided by NIH grants KL2TR000160 and U01HL105268.  
4  
5

6 Dr. Cutrona was supported by the National Center for Advancing Translational Sciences of the  
7 National Institutes of Health under award number KL2TR000160. The content is solely the  
8 responsibility of the authors and does not necessarily represent the official views of the NIH.  
9  
10  
11  
12  
13  
14  
15  
16  
17  
18  
19  
20  
21  
22  
23  
24  
25  
26  
27  
28  
29  
30  
31  
32  
33  
34  
35  
36  
37  
38  
39  
40  
41  
42  
43  
44  
45  
46  
47  
48  
49  
50  
51  
52  
53  
54  
55  
56  
57  
58  
59  
60

For peer review only

## References

1. Siegel RL, Miller KD, Jemal A. Cancer statistics, 2016. *CA: a cancer journal for clinicians* 2016;66(1):7-30.
2. Huxley RR, Ansary-Moghaddam A, Clifton P, et al. The impact of dietary and lifestyle risk factors on risk of colorectal cancer: a quantitative overview of the epidemiological evidence. *Int J Cancer* 2009;125(1):171-80. doi: 10.1002/ijc.24343 [published Online First: 2009/04/08]
3. Stoneham M, Goldacre M, Seagroatt V, et al. Olive oil, diet and colorectal cancer: an ecological study and a hypothesis. *J Epidemiol Community Health* 2000;54(10):756-60. [published Online First: 2000/09/16]
4. Kontou N, Psaltopoulou T, Soupos N, et al. The mediating effect of Mediterranean diet on the relation between smoking and colorectal cancer: a case-control study. *Eur J Public Health* 2012 doi: cks109 [pii]  
10.1093/eurpub/cks109 [published Online First: 2012/08/22]
5. Fuchs CS, Giovannucci EL, Colditz GA, et al. Dietary fiber and the risk of colorectal cancer and adenoma in women. *N Engl J Med* 1999;340(3):169-76. doi: 10.1056/NEJM199901213400301 [published Online First: 1999/01/23]
6. Park Y, Hunter DJ, Spiegelman D, et al. Dietary fiber intake and risk of colorectal cancer: a pooled analysis of prospective cohort studies. *JAMA* 2005;294(22):2849-57. doi: 294/22/2849 [pii]  
10.1001/jama.294.22.2849 [published Online First: 2005/12/15]
7. Aune D, Chan DS, Lau R, et al. Dietary fibre, whole grains, and risk of colorectal cancer: systematic review and dose-response meta-analysis of prospective studies. *BMJ* 2011;343:d6617. [published Online First: 2011/11/15]
8. Doubeni CA, Major JM, Laiyemo AO, et al. Contribution of Behavioral Risk Factors and Obesity to Socioeconomic Differences in Colorectal Cancer Incidence. *JNCI Journal of the National Cancer Institute* 2012;104(18):1353-62. doi: 10.1093/jnci/djs346
9. Larsson SC, Wolk A. Obesity and colon and rectal cancer risk: a meta-analysis of prospective studies. *Am J Clin Nutr* 2007;86(3):556-65. doi: 86/3/556 [pii] [published Online First: 2007/09/08]
10. Moghaddam AA, Woodward M, Huxley R. Obesity and risk of colorectal cancer: a meta-analysis of 31 studies with 70,000 events. *Cancer Epidemiol Biomarkers Prev* 2007;16(12):2533-47. doi: 16/12/2533 [pii]  
10.1158/1055-9965.EPI-07-0708 [published Online First: 2007/12/19]
11. Howard RA, Freedman DM, Park Y, et al. Physical activity, sedentary behavior, and the risk of colon and rectal cancer in the NIH-AARP Diet and Health Study. *Cancer Causes Control* 2008;19(9):939-53. doi: 10.1007/s10552-008-9159-0 [published Online First: 2008/04/26]
12. Siegel EM, Ulrich CM, Poole EM, et al. The effects of obesity and obesity-related conditions on colorectal cancer prognosis. *Cancer Control* 2010;17(1):52-7. [published Online First: 2009/12/17]
13. Reedy J, Mitrou PN, Krebs-Smith SM, et al. Index-based dietary patterns and risk of colorectal cancer: the NIH-AARP Diet and Health Study. *Am J Epidemiol* 2008;168(1):38-48. doi: kwn097 [pii]  
10.1093/aje/kwn097 [published Online First: 2008/06/06]
14. Bamia C, Lagiou P, Buckland G, et al. Mediterranean diet and colorectal cancer risk: results from a European cohort. *Eur J Epidemiol* 2013;28(4):317-28. doi: 10.1007/s10654-013-9795-x
15. Lee DH, Keum N, Giovannucci EL. Colorectal Cancer Epidemiology in the Nurses' Health Study. *American Journal of Public Health* 2016;106(9):1599-607. doi: 10.2105/AJPH.2016.303320

16. Pignone M, Rich M, Teutsch SM, et al. Screening for colorectal cancer in adults at average risk: a summary of the evidence for the U.S. Preventive Services Task Force. *Ann Intern Med* 2002;137(2):132-41.
  17. Lebowitz B, Capiak K, Neugut AI, et al. Risk of colorectal adenomas and advanced neoplasia in Hispanic, black and white patients undergoing screening colonoscopy. *Aliment Pharmacol Ther* 2012;35(12):1467-73. doi: 10.1111/j.1365-2036.2012.05119.x
  18. Platz EA, Willett WC, Colditz GA, et al. Proportion of colon cancer risk that might be preventable in a cohort of middle-aged US men. *Cancer Causes Control* 2000;11(7):579-88.
  19. Ogden CL, Carroll MD, Kit BK, et al. Prevalence of childhood and adult obesity in the United States, 2011-2012. *JAMA* 2014;311(8):806-14. doi: 10.1001/jama.2014.732
  20. Amine E, Baba N, Belhadj M, et al. Diet, nutrition and the prevention of chronic diseases: report of a Joint WHO/FAO Expert Consultation: World Health Organization 2002.
  21. Sacks FM, Obarzanek E, Windhauser MM, et al. Rationale and design of the Dietary Approaches to Stop Hypertension trial (DASH): a multicenter controlled-feeding study of dietary patterns to lower blood pressure. *Annals of epidemiology* 1995;5(2):108-18.
  22. Karanja NM, Obarzanek E, Lin P-H, et al. Descriptive characteristics of the dietary patterns used in the Dietary Approaches to Stop Hypertension trial. *Journal of the American Dietetic Association* 1999;99(8):S19-S27.
  23. Knuops KB, de Groot LM, Kromhout D, et al. Mediterranean diet, lifestyle factors, and 10-year mortality in elderly European men and women: The Hale project. *JAMA* 2004;292(12):1433-39. doi: 10.1001/jama.292.12.1433
  24. Jensen MD, Ryan DH, Apovian CM, et al. 2013 AHA/ACC/TOS Guideline for the Management of Overweight and Obesity in Adults: A Report of the American College of Cardiology/American Heart Association Task Force on Practice Guidelines and The Obesity Society. *Journal of the American College of Cardiology* 2014;63(25\_PA) doi: 10.1016/j.jacc.2013.11.004
  25. Schatzkin A, Subar AF, Thompson FE, et al. Design and serendipity in establishing a large cohort with wide dietary intake distributions: the National Institutes of Health-American Association of Retired Persons Diet and Health Study. *Am J Epidemiol* 2001;154(12):1119-25.
  26. Thompson FE, Subar AF, Brown CC, et al. Cognitive research enhances accuracy of food frequency questionnaire reports: results of an experimental validation study. *Journal of the American Dietetic Association* 2002;102(2):212-25.
  27. Thompson FE, Kipnis V, Midthune D, et al. Performance of a food-frequency questionnaire in the US NIH-AARP (National Institutes of Health-American Association of Retired Persons) Diet and Health Study. *Public Health Nutr* 2008;11(2):183-95. doi: 10.1017/S1368980007000419
  28. Guenther PM, Kirkpatrick SI, Reedy J, et al. The Healthy Eating Index-2010 is a valid and reliable measure of diet quality according to the 2010 Dietary Guidelines for Americans. *J Nutr* 2014;144(3):399-407. doi: 10.3945/jn.113.183079
  29. Fung TT, Hu FB, McCullough ML, et al. Diet Quality Is Associated with the Risk of Estrogen Receptor-Negative Breast Cancer in Postmenopausal Women. *The Journal of Nutrition* 2006;136(2):466-72.
  30. Reedy J, Krebs-Smith SM, Miller PE, et al. Higher diet quality is associated with decreased risk of all-cause, cardiovascular disease, and cancer mortality among older adults. *J Nutr* 2014;144(6):881-9. doi: 10.3945/jn.113.189407
  31. Mitrou PN, Kipnis V, Thiebaut AC, et al. Mediterranean dietary pattern and prediction of all-cause mortality in a US population: results from the NIH-AARP Diet and Health Study. *Arch Intern Med* 2007;167(22):2461-8. doi: 10.1001/archinte.167.22.2461 [pii]
- 10.1001/archinte.167.22.2461 [published Online First: 2007/12/12]

- 1  
2  
3  
4  
5  
6  
7  
8  
9  
10  
11  
12  
13  
14  
15  
16  
17  
18  
19  
20  
21  
22  
23  
24  
25  
26  
27  
28  
29  
30  
31  
32  
33  
34  
35  
36  
37  
38  
39  
40  
41  
42  
43  
44  
45  
46  
47  
48  
49  
50  
51  
52  
53  
54  
55  
56  
57  
58  
59  
60
32. Appel LJ, Moore TJ, Obarzanek E, et al. A clinical trial of the effects of dietary patterns on blood pressure. *New England Journal of Medicine* 1997;336(16):1117-24.
33. Xu J, Long S. Confidence intervals for predicted outcomes in regression models for categorical outcomes. *The Stata Journal* 2005;5(4):537-59.
34. Cleves M, Gould W, Gutierrez RG, et al. An Introduction to Survival Analysis Using Stata, Third Edition College Station, TX: Stata Press 2010.
35. Miller PE, Lesko SM, Muscat JE, et al. Dietary patterns and colorectal adenoma and cancer risk: a review of the epidemiological evidence. *Nutr Cancer* 2010;62(4):413-24. doi: 10.1080/01635580903407114
36. Miller PE, Cross AJ, Subar AF, et al. Comparison of 4 established DASH diet indexes: examining associations of index scores and colorectal cancer. *Am J Clin Nutr* 2013;98(3):794-803. doi: 10.3945/ajcn.113.063602
37. Sandhu MS, Dunger DB, Giovannucci EL. Insulin, Insulin-Like Growth Factor-I (IGF-I), IGF Binding Proteins, Their Biologic Interactions, and Colorectal Cancer. *Journal of the National Cancer Institute* 2002;94(13):972-80.
38. Pereira MA, Jacobs Jr DR, Van Horn L, et al. Dairy consumption, obesity, and the insulin resistance syndrome in young adults: the CARDIA Study. *Jama* 2002;287(16):2081-89.
39. Jacobs ET, Thompson PA, Martinez ME. Diet, gender, and colorectal neoplasia. *Journal of clinical gastroenterology* 2007;41(8):731-46. doi: 10.1097/MCG.0b013e3180338e56
40. Grodstein F, Newcomb PA, Stampfer MJ. Postmenopausal hormone therapy and the risk of colorectal cancer: a review and meta-analysis. *Am J Med* 1999;106(5):574-82.
41. Morch LS, Lidegaard O, Keiding N, et al. The influence of hormone therapies on colon and rectal cancer. *Eur J Epidemiol* 2016;31(5):481-9. doi: 10.1007/s10654-016-0116-z
42. Dai Z, Xu Y-C, Niu L. Obesity and colorectal cancer risk: a meta-analysis of cohort studies. *World Journal of Gastroenterology* 2007;13(31):4199.
43. David LA, Maurice CF, Carmody RN, et al. Diet rapidly and reproducibly alters the human gut microbiome. *Nature* 2014;505(7484):559-63. doi: 10.1038/nature12820
- <http://www.nature.com/nature/journal/v505/n7484/abs/nature12820.html#supplementary-information>
44. Turnbaugh PJ, Hamady M, Yatsunencko T, et al. A core gut microbiome in obese and lean twins. *Nature* 2009;457(7228):480-84. doi: [http://www.nature.com/nature/journal/v457/n7228/supinfo/nature07540\\_S1.html](http://www.nature.com/nature/journal/v457/n7228/supinfo/nature07540_S1.html)
45. Doubeni CA, Fletcher RH. Family history of colorectal cancer: it is time to rethink screening recommendations. *Gastroenterology* 2015;149(6):1321-2. doi: 10.1053/j.gastro.2015.09.030
46. Subar AF, Kipnis V, Troiano RP, et al. Using intake biomarkers to evaluate the extent of dietary misreporting in a large sample of adults: the OPEN study. *Am J Epidemiol* 2003;158(1):1-13.
47. Kipnis V, Subar AF, Midthune D, et al. Structure of dietary measurement error: results of the OPEN biomarker study. *American Journal of Epidemiology* 2003;158(1):14-21.
48. Ward E, Jemal A, Cokkinides V, et al. Cancer disparities by race/ethnicity and socioeconomic status. *CA Cancer J Clin* 2004;54(2):78-93.
49. Irby K, Anderson WF, Henson DE, et al. Emerging and widening colorectal carcinoma disparities between Blacks and Whites in the United States (1975-2002). *Cancer Epidemiol Biomarkers Prev* 2006;15(4):792-7. doi: 10.1158/1055-9965.EPI-05-0879
50. Wang DD, Leung CW, Li Y, et al. TRends in dietary quality among adults in the united states, 1999 through 2010. *JAMA Internal Medicine* 2014;174(10):1587-95. doi: 10.1001/jamainternmed.2014.3422

1  
2  
3 51. Krebs-Smith SM, Guenther PM, Subar AF, et al. Americans Do Not Meet Federal Dietary  
4 Recommendations. *The Journal of Nutrition* 2010;140(10):1832-38. doi: 10.3945/jn.110.124826  
5  
6  
7  
8  
9  
10  
11  
12  
13  
14  
15  
16  
17  
18  
19  
20  
21  
22  
23  
24  
25  
26  
27  
28  
29  
30  
31  
32  
33  
34  
35  
36  
37  
38  
39  
40  
41  
42  
43  
44  
45  
46  
47  
48  
49  
50  
51  
52  
53  
54  
55  
56  
57  
58  
59  
60

For peer review only

## STROBE Statement—checklist of items that should be included in reports of observational studies

|                              | Item No | Recommendation                                                                                                                                                                                                                                                                                                                                                                                                                                                                                                                                                                                                                                                                                                                    |
|------------------------------|---------|-----------------------------------------------------------------------------------------------------------------------------------------------------------------------------------------------------------------------------------------------------------------------------------------------------------------------------------------------------------------------------------------------------------------------------------------------------------------------------------------------------------------------------------------------------------------------------------------------------------------------------------------------------------------------------------------------------------------------------------|
| <b>Title and abstract</b>    | 1       | (a) Indicate the study's design with a commonly used term in the title or the abstract <u><a href="#">see pg. 1</a></u><br>(b) Provide in the abstract an informative and balanced summary of what was done and what was found <u><a href="#">see pg. 2</a></u>                                                                                                                                                                                                                                                                                                                                                                                                                                                                   |
| <b>Introduction</b>          |         |                                                                                                                                                                                                                                                                                                                                                                                                                                                                                                                                                                                                                                                                                                                                   |
| Background/rationale         | 2       | Explain the scientific background and rationale for the investigation being reported <u><a href="#">see pgs. 4-5</a></u>                                                                                                                                                                                                                                                                                                                                                                                                                                                                                                                                                                                                          |
| Objectives                   | 3       | State specific objectives, including any prespecified hypotheses <u><a href="#">see pgs. 4-5</a></u>                                                                                                                                                                                                                                                                                                                                                                                                                                                                                                                                                                                                                              |
| <b>Methods</b>               |         |                                                                                                                                                                                                                                                                                                                                                                                                                                                                                                                                                                                                                                                                                                                                   |
| Study design                 | 4       | Present key elements of study design early in the paper <u><a href="#">see pg. 5</a></u>                                                                                                                                                                                                                                                                                                                                                                                                                                                                                                                                                                                                                                          |
| Setting                      | 5       | Describe the setting, locations, and relevant dates, including periods of recruitment, exposure, follow-up, and data collection                                                                                                                                                                                                                                                                                                                                                                                                                                                                                                                                                                                                   |
| Participants                 | 6       | (a) <i>Cohort study</i> —Give the eligibility criteria, and the sources and methods of selection of participants. Describe methods of follow-up<br><i>Case-control study</i> —Give the eligibility criteria, and the sources and methods of case ascertainment and control selection. Give the rationale for the choice of cases and controls<br><i>Cross-sectional study</i> —Give the eligibility criteria, and the sources and methods of selection of participants <u><a href="#">see pg. 5</a></u><br>(b) <i>Cohort study</i> —For matched studies, give matching criteria and number of exposed and unexposed<br><i>Case-control study</i> —For matched studies, give matching criteria and the number of controls per case |
| Variables                    | 7       | Clearly define all outcomes, exposures, predictors, potential confounders, and effect modifiers. Give diagnostic criteria, if applicable <u><a href="#">see pgs. 6-8</a></u>                                                                                                                                                                                                                                                                                                                                                                                                                                                                                                                                                      |
| Data sources/<br>measurement | 8*      | For each variable of interest, give sources of data and details of methods of assessment (measurement). Describe comparability of assessment methods if there is more than one group                                                                                                                                                                                                                                                                                                                                                                                                                                                                                                                                              |
| Bias                         | 9       | Describe any efforts to address potential sources of bias                                                                                                                                                                                                                                                                                                                                                                                                                                                                                                                                                                                                                                                                         |
| Study size                   | 10      | Explain how the study size was arrived at                                                                                                                                                                                                                                                                                                                                                                                                                                                                                                                                                                                                                                                                                         |
| Quantitative variables       | 11      | Explain how quantitative variables were handled in the analyses. If applicable, describe which groupings were chosen and why                                                                                                                                                                                                                                                                                                                                                                                                                                                                                                                                                                                                      |
| Statistical methods          | 12      | (a) Describe all statistical methods, including those used to control for confounding<br>(b) Describe any methods used to examine subgroups and interactions<br>(c) Explain how missing data were addressed<br>(d) <i>Cohort study</i> —If applicable, explain how loss to follow-up was addressed<br><i>Case-control study</i> —If applicable, explain how matching of cases and controls was addressed<br><i>Cross-sectional study</i> —If applicable, describe analytical methods taking account of sampling strategy <u><a href="#">see pgs. 8-9</a></u><br>(e) Describe any sensitivity analyses                                                                                                                             |

Continued on next page

**Results**

|                  |     |                                                                                                                                                                                                                                                                                                                                                                                                                                     |
|------------------|-----|-------------------------------------------------------------------------------------------------------------------------------------------------------------------------------------------------------------------------------------------------------------------------------------------------------------------------------------------------------------------------------------------------------------------------------------|
| Participants     | 13* | (a) Report numbers of individuals at each stage of study—eg numbers potentially eligible, examined for eligibility, confirmed eligible, included in the study, completing follow-up, and analysed <u>see pg. 8</u><br>(b) Give reasons for non-participation at each stage<br>(c) Consider use of a flow diagram                                                                                                                    |
| Descriptive data | 14* | (a) Give characteristics of study participants (eg demographic, clinical, social) and information on exposures and potential confounders <u>see pgs. 9-11</u><br>(b) Indicate number of participants with missing data for each variable of interest <u>see pg. 8</u><br>(c) <i>Cohort study</i> —Summarise follow-up time (eg, average and total amount)                                                                           |
| Outcome data     | 15* | <i>Cohort study</i> —Report numbers of outcome events or summary measures over time<br><i>Case-control study</i> —Report numbers in each exposure category, or summary measures of exposure<br><i>Cross-sectional study</i> —Report numbers of outcome events or summary measures <u>see pg. 6</u>                                                                                                                                  |
| Main results     | 16  | (a) Give unadjusted estimates and, if applicable, confounder-adjusted estimates and their precision (eg, 95% confidence interval). Make clear which confounders were adjusted for and why they were included <u>see pgs. 11-15</u><br>(b) Report category boundaries when continuous variables were categorized<br>(c) If relevant, consider translating estimates of relative risk into absolute risk for a meaningful time period |
| Other analyses   | 17  | Report other analyses done—eg analyses of subgroups and interactions, and sensitivity analyses                                                                                                                                                                                                                                                                                                                                      |

**Discussion**

|                  |    |                                                                                                                                                                                                  |
|------------------|----|--------------------------------------------------------------------------------------------------------------------------------------------------------------------------------------------------|
| Key results      | 18 | Summarise key results with reference to study objectives <u>see pgs. 16-19</u>                                                                                                                   |
| Limitations      | 19 | Discuss limitations of the study, taking into account sources of potential bias or imprecision. Discuss both direction and magnitude of any potential bias <u>see pg. 18</u>                     |
| Interpretation   | 20 | Give a cautious overall interpretation of results considering objectives, limitations, multiplicity of analyses, results from similar studies, and other relevant evidence <u>see pgs. 16-18</u> |
| Generalisability | 21 | Discuss the generalisability (external validity) of the study results <u>see pgs. 16-18</u>                                                                                                      |

**Other information**

|         |    |                                                                                                                                                                                     |
|---------|----|-------------------------------------------------------------------------------------------------------------------------------------------------------------------------------------|
| Funding | 22 | Give the source of funding and the role of the funders for the present study and, if applicable, for the original study on which the present article is based <u>see pgs. 19-20</u> |
|---------|----|-------------------------------------------------------------------------------------------------------------------------------------------------------------------------------------|

\*Give information separately for cases and controls in case-control studies and, if applicable, for exposed and unexposed groups in cohort and cross-sectional studies.

**Note:** An Explanation and Elaboration article discusses each checklist item and gives methodological background and published examples of transparent reporting. The STROBE checklist is best used in conjunction with this article (freely available on the Web sites of PLoS Medicine at <http://www.plosmedicine.org/>, Annals of Internal Medicine at <http://www.annals.org/>, and Epidemiology at <http://www.epidem.com/>). Information on the STROBE Initiative is available at [www.strobe-statement.org](http://www.strobe-statement.org).
